# Supplementary material for: Seasonal Dynamics of Lake Winnipeg’s Microbial Communities Reveal Aerobic Anoxygenic Phototrophic Populations Coincide with Sunlight Availability
Source: MDPI journal article supplement (doi:10.3390/microorganisms10091690), 2022-08-23
Supplement: s1 [file s1]

# **Seasonal dynamics of Lake Winnipeg's microbial communities reveal aerobic anoxygenic phototrophic populations to coincide with sunlight availability**

*Steven B. Kuzyk, Xiao Ma, and Vladimir Yurkov\**

*Microbiology Department, University of Manitoba, Winnipeg, MB, R3T 2N2, Canada*

*\*Corresponding author*

## **Supplemental Figures:**

**Figure S1. AAP counts on various complex media.**

**Figure S2. Rarefaction curves of sequenced microbial communities.**

**Figure S3. Alternative colourations of PCoA ordination based on Jaccard diversity distance matrix.**

**Figure S4. Littoral community composition of sediment compared to liquid samples.**

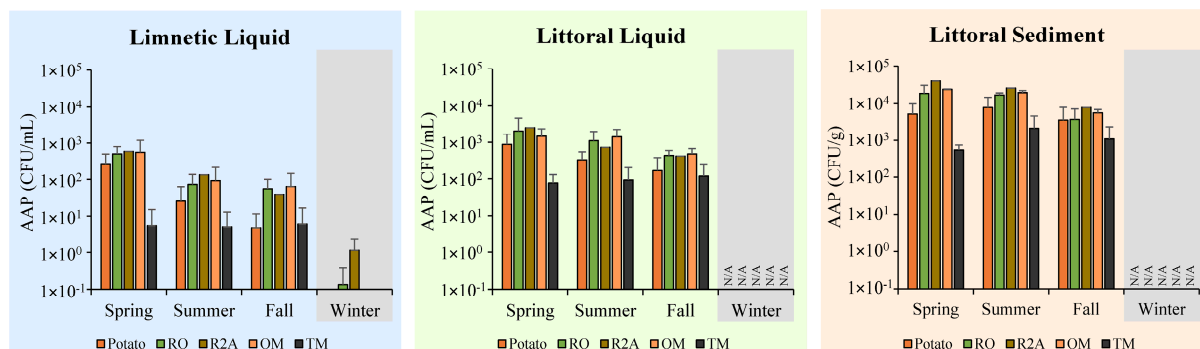

**Figure S1. AAP counts on various complex media.** Enumerated values from all limnetic water and littoral water/sediment samples, averaged by season. N/A, not analyzed.

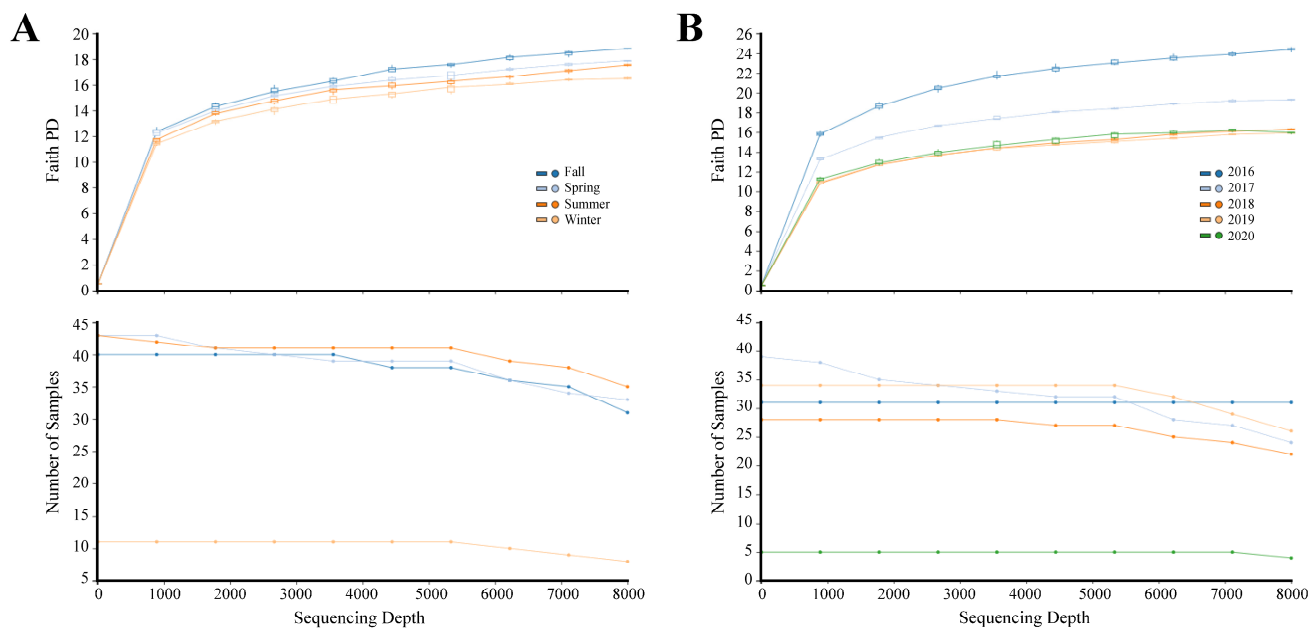

**Figure S2. Rarefaction curves of sequenced microbial communities. (A)** Yearly and **(B)** seasonal totals of 16S V4 rRNA genes reached a plateau in diversity, when all samples reached sufficient sequencing depth.

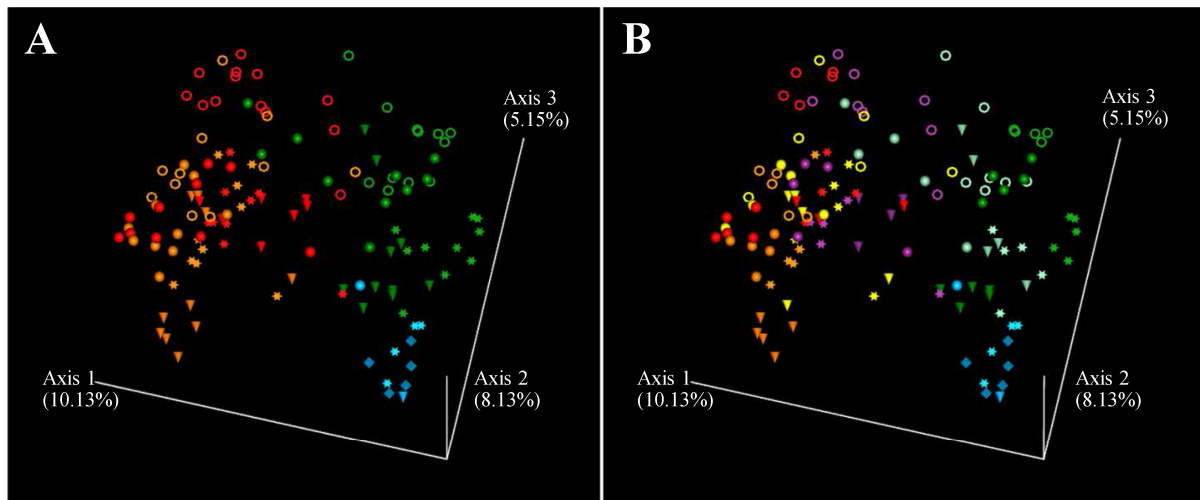

**Figure S3. Alternative colouration of PCoA ordination based on Jaccard diversity distance matrix. (A)** Seasons included: Winter, blue; Spring, green; Summer, orange; Fall, red. **(B)** Euphotic zones separated: Winter limnetic, blue; Spring limnetic, green; Spring littoral, teal; Summer limnetic, orange; Summer littoral, yellow; Fall limnetic, red; Fall littoral, purple.

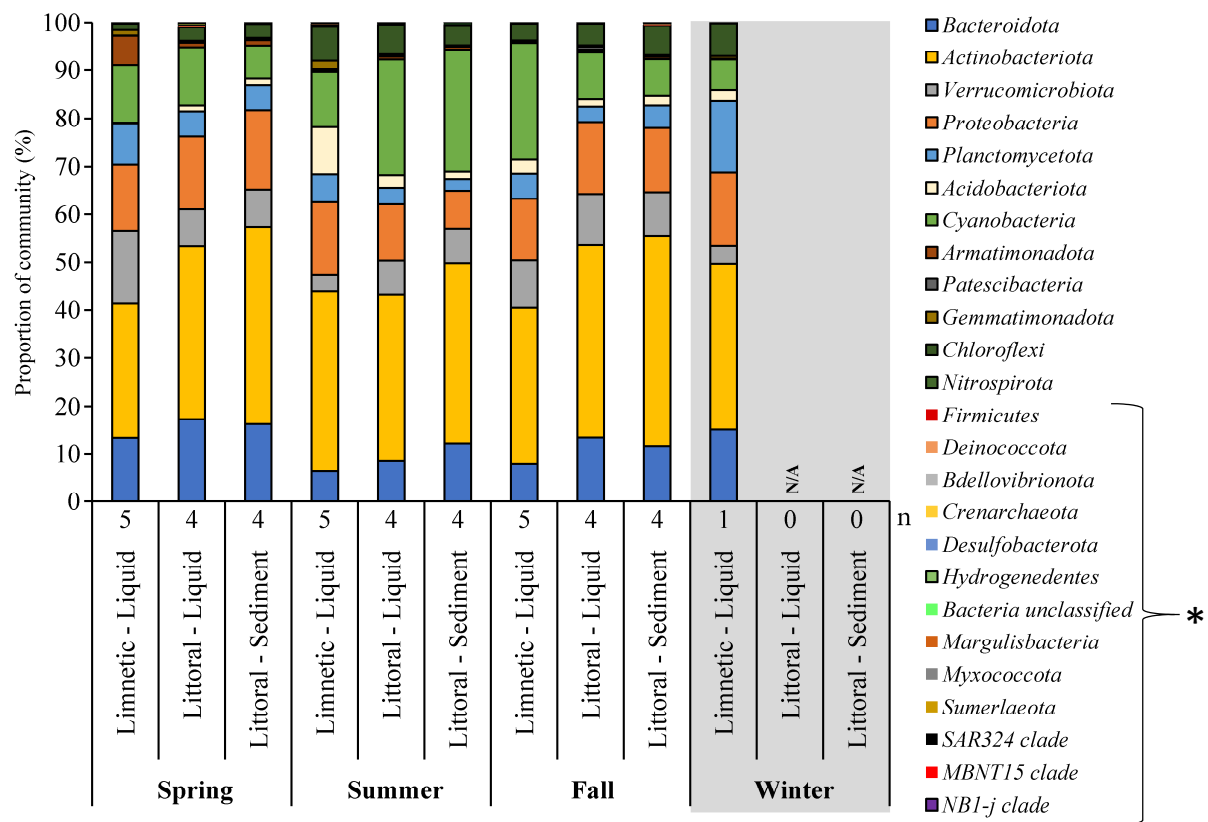

**Figure S4. Littoral community composition of sediment compared to liquid samples.** Zone averages from Spring 2017 to Winter of 2018. N/A, not analyzed; n, number of samples per season. \*, *Minimal Clades* (<1%).
