# Supplementary material for: Seasonal Dynamics of Lake Winnipeg’s Microbial Communities Reveal Aerobic Anoxygenic Phototrophic Populations Coincide with Sunlight Availability
Source: MDPI journal article supplement (doi:10.3390/microorganisms10091690), 2022-08-23
Supplement: s1 [file s1]

# **Seasonal dynamics of Lake Winnipeg's microbial communities reveal aerobic anoxygenic phototrophic populations to coincide with sunlight availability**

*Steven B. Kuzyk, Xiao Ma, and Vladimir Yurkov\**

*Microbiology Department, University of Manitoba, Winnipeg, MB, R3T 2N2, Canada*

*\*Corresponding author*

## **Supplemental Tables:**

**Table S1. Sampling dates and environmental parameters.**

**Table S2. Average elemental composition of limnetic site samples.**

**Table S3. Media composition used to cultivate different groups of microorganisms.**

**Table S4. Enumeration data from all individual sites and seasons.**

**Table S5. AAP type species used as reference for eDNA 16S V4 rRNA gene analysis.**

**Table S6. AnAnP type species used as reference for eDNA 16S V4 rRNA gene analysis.**

**Table S1. Sampling dates and environmental parameters. Listed for each site (1-10).**

| Year | Season | Characteristic        | 1<br>Littoral | 2<br>Littoral | 3<br>Littoral | 4<br>Littoral | 5<br>Littoral | 6<br>Limnetic | 7<br>Limnetic | 8<br>Limnetic | 9<br>Limnetic | 10<br>Limnetic |
|------|--------|-----------------------|---------------|---------------|---------------|---------------|---------------|---------------|---------------|---------------|---------------|----------------|
| 2016 | Spring | Date                  | 2016.06.14    | 2016.06.14    | 2016.06.14    | 2016.06.14    | 2016.06.14    | 2016.06.02    | 2016.06.02    | 2016.06.07    | 2016.06.07    | 2016.06.07     |
|      |        | Time                  | 8:12          | 14:07         | 10:24         | 11:27         | 12:16         | 12:20         | 15:10         | 11:52         | 14:15         | 17:45          |
|      |        | Daylight (h)          | 16:26:57      | 16:24:45      | 16:26:16      | 16:27:42      | 16:26:48      | 16:15:22      | 16:16:51      | 16:24:32      | 16:18:15      | 16:25:47       |
|      |        | Water pH              | 8.3           | 8.6           | 8.3           | 8.6           | 8.5           | 8.1           | 8.5           | 8.1           | 8.2           | 7.8            |
|      |        | Water (°C)            | 14.0          | 13.0          | 15.0          | 11.0          | 18.0          | 12.0          | 13.0          | 14.2          | 15.1          | 14.6           |
|      |        | Air (°C)              | 26.0          | 28.0          | 27.0          | 27.0          | 24.0          | 10.3          | 12.0          | 10.5          | 15.0          | 12.6           |
|      | Summer | Water clarity (m)     | 0.81          | 0.50          | 0.20          | 0.30          | 0.76          | 0.80          | 1.10          | 1.25          | 1.05          | 0.8            |
|      |        | Light intensity (lux) | 106000        | 125500        | 126300        | 124700        | 127400        | 78000         | 107800        | 126700        | 127000        | 33600          |
|      |        | Date                  | 2016.08.25    | 2016.08.25    | 2016.08.25    | 2016.08.25    | 2016.08.25    | 2016.07.29    | 2016.07.29    | 2016.07.19    | 2016.07.19    | 2016.07.19     |
|      |        | Time                  | 7:38          | 9:13          | 9:51          | 10:37         | 11:25         | 18:00         | 14:03         | 11:58         | 14:44         | 18:23          |
|      |        | Daylight (h)          | 13:54:19      | 13:53:29      | 13:54:03      | 13:54:36      | 13:54:16      | 15:20:21      | 15:27:29      | 15:54:59      | 15:56:00      | 15:56:04       |
|      |        | Water pH              | 8.5           | 8.4           | 8.6           | 8.8           | 8.8           | 8.4           | 8.3           | 8.0           | 7.8           | 8.1            |
|      | Fall   | Water (°C)            | 23.0          | 25.0          | 23.0          | 22.0          | 22.0          | 22.7          | 22.1          | 20.9          | 21.1          | 21.1           |
|      |        | Air (°C)              | 13.0          | 17.0          | 18.5          | 18.0          | 19.0          | 28.5          | 24.0          | 23.2          | 23.5          | 23.5           |
|      |        | Water clarity (m)     | 0.20          | 0.10          | 0.20          | 0.20          | 0.10          | 0.50          | 0.75          | 0.40          | 0.30          | 0.4            |
|      |        | Light intensity (lux) | 47300         | 106000        | 40500         | 46600         | 129100        | 120400        | 100400        | 50500         | 115300        | 102700         |
|      |        | Date                  | 2016.10.17    | 2016.10.17    | 2016.10.17    | 2016.10.17    | 2016.10.17    | 2016.09.26    | 2016.09.26    | 2016.09.12    | 2016.09.12    | 2016.09.12     |
|      |        | Time                  | 9:57          | 11:25         | 12:12         | 12:50         | 13:25         | 10:31         | 12:51         | 13:00         | 19:11         | 14:33          |
|      |        | Daylight (h)          | 10:35:32      | 10:36:13      | 10:35:45      | 10:35:19      | 10:35:35      | 11:46:46      | 11:58:12      | 12:48:05      | 12:48:16      | 12:48:17       |
|      |        | Water pH              | 8.0           | 8.3           | 8.3           | 8.3           | 8.5           | 8.0           | 8.2           | 8.3           | 8.3           | 8.2            |
|      |        | Water (°C)            | 9.0           | 8.0           | 9.0           | 13.0          | 14.0          | 14.9          | 16.1          | 18.9          | 14.6          | 18.9           |
|      |        | Air (°C)              | 13.0          | 11.0          | 12.5          | 13.0          | 15.0          | 10.7          | 12.5          | 13.5          | 12.0          | 15.5           |
|      |        | Water clarity (m)     | 0.10          | 0.20          | 0.20          | 0.20          | 0.13          | 0.35          | 0.40          | 0.25          | 0.45          | 0.5            |
|      |        | Light intensity (lux) | 116800        | 117500        | 126600        | 127800        | 122800        | 22000         | 45000         | 30000         | 3050          | 32000          |
| 2017 | Winter | Date                  | N/A           | 2017.02.22    | N/A           | N/A            |
|      |        | Time                  | N/A           | 12:03         | N/A           | N/A            |
|      |        | Daylight (h)          | N/A           | 10:31:04      | N/A           | N/A            |
|      |        | Water pH              | N/A           | 7.8           | N/A           | N/A            |
|      |        | Water (°C)            | N/A           | 0.1           | N/A           | N/A            |
|      |        | Air (°C)              | N/A           | -1.4          | N/A           | N/A            |
|      | Spring | Water clarity (m)     | N/A           | 1.80          | N/A           | N/A            |
|      |        | Light intensity (lux) | N/A            |
|      |        | Date                  | 2017.05.08    | 2017.05.08    | 2017.05.08    | 2017.05.08    | 2017.05.08    | 2017.05.31    | 2017.05.31    | 2017.06.06    | 2017.06.06    | 2017.06.06     |
|      |        | Time                  | 7:45          | 9:15          | 9:55          | 10:38         | 11:10         | 11:54         | 14:03         | 15:50         | 21:40         | 17:50          |
|      |        | Daylight (h)          | 15:10:10      | 15:08:42      | 15:09:43      | 15:10:40      | 15:10:04      | 16:11:24      | 16:12:52      | 16:22:54      | 16:24:03      | 16:24:09       |
|      |        | Water pH              | 8.7           | 8.4           | 8.4           | 8.2           | 8.7           | 8.4           | 8.4           | 8.5           | 8.4           | 8.3            |
|      | Summer | Water (°C)            | 16.0          | 19.5          | 17.5          | 17.0          | 17.5          | 11.7          | 12.7          | 15.1          | 13.2          | 16.2           |
|      |        | Air (°C)              | 22.0          | 18.0          | 20.5          | 24.5          | 22.0          | 18.0          | 13.6          | 20.7          | 20.6          | 19.6           |
|      |        | Water clarity (m)     | 0.03          | 0.38          | 0.13          | 0.13          | 0.05          | 1.40          | 1.40          | 1.50          | 1.40          | 1.5            |
|      |        | Light intensity (lux) | 106100        | 114300        | 122800        | 119300        | 126100        | 127000        | 129000        | 125900        | 60000         | 123200         |
|      |        | Date                  | 2017.08.04    | 2017.08.17    | 2017.08.17    | 2017.08.17    | 2017.08.17    | 2017.08.04    | 2017.08.04    | 2017.07.25    | 2017.07.25    | 2017.07.25     |
|      |        | Time                  | 21:00         | 8:48          | 9:45          | 10:25         | 11:06         | 10:46         | 12:45         | 12:06         | 16:27         | 14:29          |
|      | Fall   | Daylight (h)          | 15:07:10      | 14:22:39      | 14:23:23      | 14:24:05      | 14:23:39      | 15:08:38      | 15:09:40      | 16:19:44      | 15:40:51      | 15:40:55       |
|      |        | Water pH              | 8.3           | 9.1           | 8.8           | 8.9           | 9.2           | 8.2           | 8.3           | 8.2           | 8.3           | 8.1            |
|      |        | Water (°C)            | 22.5          | 22.0          | 24.0          | 22.0          | 22.5          | 22.0          | 22.9          | 20.8          | 22.6          | 21.3           |
|      |        | Air (°C)              | 22.2          | 14.0          | 18.0          | 18.5          | 19.0          | 20.3          | 22.1          | 21.8          | 21.8          | 22.6           |
|      |        | Water clarity (m)     | 0.90          | 1.30          | 1.17          | 1.04          | >1.32         | 0.45          | 0.70          | 0.35          | 0.25          | 0.4            |
|      |        | Light intensity (lux) | N/A           | 74400         | 109700        | 110100        | 120400        | 128700        | 143100        | 129500        | 11340         | 56200          |
| 2018 | Winter | Date                  | 2017.10.01    | 2017.10.01    | 2017.10.15    | 2017.10.15    | 2017.10.15    | 2017.10.04    | 2017.10.04    | 2017.09.18    | 2017.09.18    | 2017.09.18     |
|      |        | Time                  | 8:23          | 10:21         | 7:30          | 8:10          | 8:50          | 13:35         | 13:47         | 18:20         | 23:10         | 21:20          |
|      |        | Daylight (h)          | 11:36:25      | 11:36:38      | 11:36:29      | 11:36:21      | 11:36:26      | 11:24:47      | 11:24:34      | 12:26:01      | 12:26:06      | 12:26:07       |
|      |        | Water pH              | 8.8           | 9.1           | 8.0           | 8.2           | 8.1           | 8.2           | 8.2           | 8.5           | 8.0           | 8.4            |
|      |        | Water (°C)            | 9.5           | 13.0          | 16.0          | 15.0          | 15.0          | 13.1          | 12.3          | 15.5          | 13.0          | 15.4           |
|      |        | Air (°C)              | 14.0          | 17.0          | 4.0           | 5.0           | 5.5           | 13.4          | 11.3          | 11.9          | 15.5          | 14.8           |
|      | Spring | Water clarity (m)     | 0.84          | 0.48          | 0.90          | 1.00          | 0.35          | 0.90          | 0.90          | 0.79          | 1.07          | 0.79           |
|      |        | Light intensity (lux) | 43700         | 61000         | 2020          | 16240         | 25220         | 21700         | 41800         | 125400        | 72900         | 119300         |
|      |        | Date                  | N/A           | N/A           | N/A           | N/A           | N/A           | 2018.02.26    | N/A           | 2018.02.26    | N/A           | N/A            |
|      |        | Time                  | N/A           | N/A           | N/A           | N/A           | N/A           | 15:30         | N/A           | 10:35         | N/A           | N/A            |
|      |        | Daylight (h)          | N/A           | N/A           | N/A           | N/A           | N/A           | 10:45:52      | N/A           | 10:45:22      | N/A           | N/A            |
|      |        | Water pH              | N/A           | N/A           | N/A           | N/A           | N/A           | 7.71          | N/A           | 7.72          | N/A           | N/A            |
|      | Summer | Water (°C)            | N/A           | N/A           | N/A           | N/A           | N/A           | -0.1          | N/A           | -0.1          | N/A           | N/A            |
|      |        | Air (°C)              | N/A           | N/A           | N/A           | N/A           | N/A           | -5.0          | N/A           | -2.0          | N/A           | N/A            |
|      |        | Water clarity (m)     | N/A           | N/A           | N/A           | N/A           | N/A           | 1.00          | N/A           | 1.40          | N/A           | N/A            |
|      |        | Light intensity (lux) | N/A            |

Table S1. (continued)

| Year | Season | Characteristic        | 1          | 2          | 3          | 4          | 5          | 6          | 7          | 8          | 9          | 10         |
|------|--------|-----------------------|------------|------------|------------|------------|------------|------------|------------|------------|------------|------------|
|      |        |                       | Littoral   | Littoral   | Littoral   | Littoral   | Littoral   | Limnetic   | Limnetic   | Limnetic   | Limnetic   | Limnetic   |
| 2018 | Spring | Date                  | 2018.05.29 | 2018.05.29 | 2018.05.29 | 2018.05.29 | 2018.05.29 | 2018.06.13 | 2018.06.12 | 2018.06.13 | 2018.06.04 | 2018.06.04 |
|      |        | Time                  | 7:42       | 9:19       | 10:07      | 10:52      | 11:35      | 9:26       | 10:00      | 12:53      | 8:59       | 10:14      |
|      |        | Daylight (h)          | 16:05:02   | 16:03:03   | 16:04:25   | 16:05:42   | 16:04:54   | 16:23:20   | 16:22:17   | 16:22:34   | 16:20:45   | 16:30:35   |
|      |        | Water pH              | 9.2        | 9.4        | 9.1        | 9.3        | 8.7        | 8.2        | 8.1        | 8.2        | 8.0        | 8.2        |
|      |        | Water (°C)            | 15.0       | 19.0       | 15.5       | 16.0       | 20.0       | 16.2       | 13.7       | 12.9       | 17.2       | 15.6       |
|      |        | Air (°C)              | 20.0       | 25.5       | 27.5       | 27.0       | 26.0       | 16.5       | 16.0       | 18.5       | 20.3       | 20         |
|      | Summer | Water clarity (m)     | 1.07       | 0.05       | 0.52       | 1.00       | 0.97       | 1.96       | 1.20       | 2.33       | 2.33       | 2.33       |
|      |        | Light intensity (lux) | 60400      | 118800     | 123500     | 124900     | 124800     | 99000      | 13700      | 92100      | 119400     | 124200     |
|      |        | Date                  | 2018.07.30 | 2018.08.08 | 2018.08.08 | 2018.08.08 | 2018.08.08 | 2018.08.07 | 2018.07.31 | 2018.08.07 | 2018.07.30 | 2018.07.30 |
|      |        | Time                  | 3:50       | 8:07       | 8:51       | 9:36       | 10:17      | 10:35      | 9:44       | 12:00      | 12:08      | 10:39      |
|      |        | Daylight (h)          | 15:23:11   | 14:53:45   | 14:54:41   | 14:55:33   | 14:55:00   | 14:59:45   | 15:22:56   | 15:00:54   | 15:01:39   | 15:01:43   |
|      |        | Water pH              | 8.5        | 8.8        | 8.4        | 8.6        | 8.8        | 8.3        | 8.2        | 8.3        | 8.1        | 8.2        |
|      | Fall   | Water (°C)            | 21.5       | 24.0       | 22.0       | 22.0       | 21.5       | 20.0       | 21.2       | 20.2       | 21.1       | 20.6       |
|      |        | Air (°C)              | 31.0       | 22.0       | 24.0       | 24.5       | 24.0       | 19.1       | 18.3       | 18.9       | 15.8       | 25.6       |
|      |        | Water clarity (m)     | 0.81       | 0.42       | 0.50       | 0.58       | 0.20       | 0.39       | 0.84       | 0.67       | 0.56       | 0.53       |
|      |        | Light intensity (lux) | 105300     | 61500      | 82900      | 86900      | 104700     | 1170       | 2340       | 9850       | 3240       | 8320       |
|      |        | Date                  | 2018.10.22 | 2018.10.08 | 2018.10.08 | 2018.10.08 | 2018.10.08 | 2018.10.22 | -          | 2018.09.25 | -          | 2018.09.25 |
|      |        | Time                  | 18:00      | 8:34       | 9:20       | 10:15      | 10:50      | 10:19      | -          | 11:32      | -          | 13:53      |
|      |        | Daylight (h)          | 10:18:59   | 11:11:19   | 11:11:03   | 11:10:48   | 11:10:57   | 10:18:11   | Ship       | 12:00:03   | Ship       | 12:00:02   |
|      |        | Water pH              | 8.0        | 8.5        | 8.3        | 8.3        | 8.3        | 8.2        | Repaired   | 8.4        | Repaired   | 8.3        |
|      |        | Water (°C)            | 3.0        | 4.5        | 6.0        | 6.0        | 6.5        | 4.1        | No         | 12.1       | No         | 12.2       |
|      |        | Air (°C)              | 1.5        | 4.0        | 4.5        | 4.5        | 6.0        | 2.6        | Sampling   | 7.2        | Sampling   | 9.3        |
|      |        | Water clarity (m)     | 0.25       | 0.15       | 0.41       | 0.67       | 0.29       | 0.65       | -          | 0.50       | -          | 0.86       |
|      |        | Light intensity (lux) | 6890       | 4800       | 11240      | 14090      | 2250       | 12270      | -          | 128700     | -          | 122800     |
| 2019 | Winter | Alternative Sites     | N/A        | N/A        | N/A        | N/A        | N/A        | W10        | W1         | W9         | W6         | W8         |
|      |        | Date                  | N/A        | N/A        | N/A        | N/A        | N/A        | 2019.02.28 | 2019.02.20 | 2019.02.28 | 2019.02.21 | 2019.02.28 |
|      |        | Time                  | N/A        | N/A        | N/A        | N/A        | N/A        | 13:20      | 9:00       | 9:30       | 10:50      | 11:30      |
|      |        | Daylight (h)          | N/A        | N/A        | N/A        | N/A        | N/A        | 10:41:11   | 10:12:29   | 10:40:37   | 10:19:28   | 10:50:10   |
|      |        | Water pH              | N/A        | N/A        | N/A        | N/A        | N/A        | 7.8        | 8.17       | 7.7        | 8.09       | 7.96       |
|      |        | Water (°C)            | N/A        | N/A        | N/A        | N/A        | N/A        | -0.5       | -1.0       | -0.7       | -1.0       | 0.8        |
|      |        | Air (°C)              | N/A        | N/A        | N/A        | N/A        | N/A        | -8.0       | -18.9      | -9.0       | -17.1      | -10        |
|      |        | Water clarity (m)     | N/A        | N/A        | N/A        | N/A        | N/A        | 1.8        | 0.70       | 1.2        | 0.60       | 0.6        |
|      |        | Light intensity (lux) | N/A        |
|      | Spring | Sites                 | 1          | 2          | 3          | 4          | 5          | 6          | 7          | 8          | 9          | 10         |
|      |        | Date                  | 2019.06.03 | 2019.06.08 | 2019.06.08 | 2019.06.05 | 2019.06.08 | 2019.06.03 | 2019.06.03 | 2019.06.05 | 2019.06.05 | 2019.06.05 |
|      |        | Time                  | 7:07       | 7:38       | 8:28       | 7:00       | 9:26       | 11:30      | 2:30       | 10:25      | 16:45      | 13:12      |
|      |        | Daylight (h)          | 16:13:44   | 16:18:44   | 16:20:13   | 16:17:33   | 16:20:44   | 16:15:44   | 16:17:12   | 16:20:50   | 16:21:58   | 16:22:05   |
|      |        | Water pH              | 8.4        | 7.5        | 8.1        | 8.0        | 7.6        | 8.2        | 8.4        | 8.5        | 8.0        | 8.5        |
|      |        | Water (°C)            | 13.0       | 16.0       | 13.0       | 12.0       | 15.5       | 10.5       | 11.1       | 11.2       | 12.4       | 12         |
|      | Summer | Air (°C)              | 12.9       | 18.0       | 18.0       | 12.1       | 17.0       | 10.2       | 11.3       | 12.9       | 18.7       | 17.1       |
|      |        | Water clarity (m)     | 0.76       | 0.38       | 0.34       | 0.53       | >1.50      | 0.9        | 0.8        | 1.2        | 1.6        | 1.1        |
|      |        | Light intensity (lux) | 12020      | 8550       | 8140       | 106800     | 28700      | 6630       | 37800      | 126200     | 48400      | 66200      |
|      |        | Date                  | 2019.08.06 | 2019.08.13 | 2019.08.13 | 2019.08.13 | 2019.08.13 | 2019.08.06 | 2019.08.06 | 2019.07.23 | 2019.07.23 | 2019.07.23 |
|      |        | Time                  | 7:20       | 7:02       | 8:20       | 10:20      | 9:05       | 11:33      | 2:15       | 11:24      | 17:15      | 14:05      |
|      |        | Daylight (h)          | 15:02:21   | 14:37:59   | 14:38:49   | 14:39:36   | 14:39:07   | 15:03:42   | 15:04:42   | 15:46:41   | 15:47:39   | 15:47:44   |
|      | Fall   | Water pH              | 8.4        | 8.7        | 8.4        | 8.3        | 8.2        | 8.4        | 8.3        | 8.0        | 8.1        | 8          |
|      |        | Water (°C)            | 26.0       | 25.0       | 23.0       | 24.0       | 19.0       | 22.2       | 22.1       | 21.8       | 21.3       | 22.7       |
|      |        | Air (°C)              | 16.7       | 15.5       | 25.5       | 24.0       | 23.0       | 21.8       | 24.8       | 23.1       | 23.2       | 24.1       |
|      |        | Water clarity (m)     | 0.65       | 0.39       | 0.61       | 0.51       | 1.02       | 0.50       | 1.40       | 0.60       | 0.85       | 0.8        |
|      |        | Light intensity (lux) | 15310      | 6030       | 95500      | 118000     | 116500     | 41500      | 64600      | 119700     | 122400     | 117800     |
|      |        | Date                  | 2019.10.02 | 2019.09.22 | 2019.09.22 | 2019.09.22 | 2019.09.22 | 2019.10.02 | 2019.10.02 | 2019.09.16 | 2019.09.16 | 2019.09.16 |
| 2020 | Winter | Time                  | 8:55       | 8:11       | 11:03      | 12:28      | 11:55      | 13:10      | 16:10      | 13:03      | 19:00      | 15:45      |
|      |        | Daylight (h)          | 11:34:29   | 12:12:21   | 12:12:24   | 12:12:26   | 12:12:25   | 13:28:13   | 11:34:07   | 12:35:34   | 12:35:42   | 12:35:42   |
|      |        | Water pH              | 8.2        | 8.2        | 8.1        | 8.0        | 8.2        | 8.2        | 8.2        | 8.2        | 8.0        | 8.2        |
|      |        | Water (°C)            | 9.0        | 15.0       | 15.5       | 14.0       | 16.0       | 11.9       | 10.4       | 15.8       | 16.8       | 16.2       |
|      |        | Air (°C)              | 3.1        | 14.5       | 16.0       | 17.0       | 14.5       | 4.7        | 5.2        | 21.4       | 23.1       | 27.7       |
|      |        | Water clarity (m)     | 0.33       | 0.17       | 0.27       | 0.19       | 0.13       | 0.50       | 0.70       | 0.50       | 0.09       | 0.85       |
|      |        | Light intensity (lux) | 4380       | 10980      | 122000     | 133500     | 192000     | 29400      | 18800      | 35200      | N/A        | 7750       |
|      |        | Alternative Sites     | N/A        | N/A        | N/A        | N/A        | N/A        | W10        | W1         | W9         | W6         | W8         |
|      |        | Date                  | N/A        | N/A        | N/A        | N/A        | N/A        | 2020.02.24 | 2020.03.04 | 2020.02.24 | 2020.03.03 | 2020.02.24 |
|      |        | Time                  | N/A        | N/A        | N/A        | N/A        | N/A        | 14:10      | 9:30       | 13:15      | 9:30       | 10:30      |
|      |        | Daylight (h)          | N/A        | N/A        | N/A        | N/A        | N/A        | 10:36:30   | 11:05:44   | 10:35:53   | 11:03:09   | 10:33:30   |
|      |        | Water pH              | N/A        | N/A        | N/A        | N/A        | N/A        | 6.3        | 6.66       | 7.1        | 6.53       | 6.34       |
|      |        | Water (°C)            | N/A        | N/A        | N/A        | N/A        | N/A        | 0.4        | -9.2       | 0.3        | -10.1      | -2.9       |
|      |        | Air (°C)              | N/A        | N/A        | N/A        | N/A        | N/A        | -0.9       | -0.8       | -0.5       | -0.7       | -0.6       |
|      |        | Water clarity (m)     | N/A        | N/A        | N/A        | N/A        | N/A        | 1.00       | 0.70       | 0.70       | 0.50       | 0.6        |
|      |        | Light intensity (lux) | N/A        |

N/A, Not analyzed

**Table S2. Average elemental composition of limnetic site samples. Listed as ppm.**

|                                      | 2016<br>Spring | Summer   | Fall     | 2017<br>Winter | Spring   | Summer    | Fall       | 2018<br>Winter |
|--------------------------------------|----------------|----------|----------|----------------|----------|-----------|------------|----------------|
| <b>Ag</b>                            | L0.00001       | 0.000005 | L0.00001 | L0.00001       | L0.00001 | L0.00001  | L0.00001   | L0.00001       |
| <b>Al</b>                            | 0.191          | 1.5035   | 1.42     | 0.213          | 0.113    | 0.68      | 0.261      | 0.12           |
| <b>As</b>                            | 0.00188        | 0.001825 | 0.002395 | 0.00116        | 0.001645 | 0.00207   | 0.002885   | 0.001135       |
| <b>Ba</b>                            | 0.02625        | 0.0314   | 0.0371   | 0.00996        | 0.0229   | 0.0327    | 0.03275    | 0.0117         |
| <b>Be</b>                            | L0.0002        | L0.0002  | L0.0002  | L0.0002        | L0.0002  | L0.0001   | L0.0001    | L0.0001        |
| <b>Bi</b>                            | L0.0002        | L0.0002  | L0.0002  | L0.0002        | L0.0002  | L0.00005  | L0.00005   | L0.00005       |
| <b>B</b>                             | 0.0315         | 0.0245   | 0.0305   | L0.01          | 0.0245   | 0.033     | 0.038      | 0.01           |
| <b>Cd</b>                            | 0.00001        | 0.00002  | 0.00002  | 0.00001        | L0.00001 | 0.00002   | 0.00000955 | 0.0000179      |
| <b>Ca</b>                            | 33.65          | 25.4     | 27.85    | 11.5           | 28.2     | 32        | 36.1       | 15.25          |
| <b>C (organic)</b>                   | 10.175         | 8.775    | 10.35    | 12.24          | 10.175   | 9.15      | 11.85      | 12.6           |
| <b>C (inorganic)</b>                 | 17.575         | 20.025   | 20.05    | 9.26           | 19.275   | 22        | 20.775     | 10.5           |
| <b>C (total)</b>                     | 27.75          | 28.8     | 30.4     | 21.5           | 29.45    | 31.15     | 32.625     | 23.1           |
| <b>Cs</b>                            | L0.0001        | 0.000205 | 0.00018  | L0.0001        | L0.0001  | 0.000099  | 0.0000445  | 0.0000945      |
| <b>Cl</b>                            | 12.1           | 8.83     | 11.375   | 1.66           | 9.58     | 9.72      | 11.71      | 2              |
| <b>Cr</b>                            | 0.00034        | 0.002155 | 0.002055 | 0.00046        | 0.00023  | 0.001105  | 0.00048    | 0.00031        |
| <b>Co</b>                            | L0.0002        | 0.0005   | 0.000505 | L0.0002        | L0.0002  | 0.00038   | 0.000175   | L0.0001        |
| <b>Cu</b>                            | 0.001845       | 0.002465 | 0.002695 | 0.00134        | 0.001705 | 0.002355  | 0.00201    | 0.001565       |
| <b>Fe</b>                            | 0.1725         | 1.233    | 1.163    | 0.21           | 0.1025   | 0.7435    | 0.2525     | 0.1155         |
| <b>K</b>                             | 3.795          | 3.105    | 3.66     | 0.931          | 3.06     | 3.585     | 3.875      | 0.988          |
| <b>Li</b>                            | 0.01545        | 0.01125  | 0.0151   | L0.002         | 0.01265  | 0.01585   | 0.0194     | 0.00365        |
| <b>Mg</b>                            | 15.3           | 11.655   | 14.32    | 3.66           | 14.05    | 15.65     | 18.2       | 5.17           |
| <b>Mn</b>                            | 0.01865        | 0.0561   | 0.0511   | 0.00672        | 0.02256  | 0.06615   | 0.0204     | 0.01021        |
| <b>Hg</b>                            | N/A            | N/A      | N/A      | N/A            | N/A      | N/A       | N/A        | N/A            |
| <b>Mo</b>                            | 0.000895       | 0.00069  | 0.00086  | L0.0002        | 0.0007   | 0.00079   | 0.001058   | 0.0002075      |
| <b>Ni</b>                            | 0.00168        | 0.00275  | 0.00287  | 0.00084        | 0.001415 | 0.00256   | 0.00174    | 0.000885       |
| <b>N</b>                             | 0.8575         | 0.8425   | 0.8025   | 0.59           | 0.5875   | 0.765     | 0.7425     | 0.505          |
| <b>N (Kjeldahl)</b>                  | 0.6925         | 0.625    | 0.5775   | 0.41           | 0.5875   | 0.6125    | 0.6875     | 0.385          |
| <b>NH<sub>3</sub></b>                | 0.01375        | 0.0105   | 0.01375  | 0.04           | 0.01025  | 0.0465    | 0.02125    | L0.01          |
| <b>NO<sub>2</sub>+NO<sub>3</sub></b> | 0.1655         | 0.218    | 0.22425  | 0.181          | N/A      | 0.1515    | 0.0795     | 0.1215         |
| <b>Na</b>                            | 16.15          | 11.82    | 14.505   | 2.37           | 13.55    | 15.15     | 17.8       | 3.055          |
| <b>O</b>                             | 10.05          | 8.05     | 8.8      | 10.6           | 10.2     | 7.25      | 9.5        | 14.25          |
| <b>P</b>                             | 0.065          | 0.09325  | 0.13625  | 0.032          | 0.05575  | 0.11075   | 0.104      | 0.032          |
| <b>P (dissolved)</b>                 | 0.0395         | 0.0595   | 0.08425  | 0.024          | 0.0415   | 0.07475   | 0.07925    | 0.0235         |
| <b>P (inorganic)</b>                 | 0.054          | 0.0825   | 0.12425  | 0.028          | 0.0455   | 0.10575   | 0.098      | 0.03           |
| <b>P (particulate)</b>               | 0.0265         | 0.041    | 0.054    | L0.014         | 0.016    | 0.042     | 0.03       | L0.014         |
| <b>P (reactive)</b>                  | 0.0405         | 0.06425  | 0.0995   | 0.026          | 0.03675  | 0.09075   | 0.0965     | 0.024          |
| <b>P (acid hydrolizable)</b>         | 0.01625        | 0.0215   | 0.02675  | L0.014         | L0.014   | 0.01525   | L0.014     | L0.014         |
| <b>Pb</b>                            | 0.000115       | 0.000585 | 0.000555 | 0.00013        | 0.0001   | 0.000473  | 0.0001725  | 0.0001115      |
| <b>Rb</b>                            | 0.001765       | 0.004075 | 0.0042   | 0.0016         | 0.001555 | 0.00289   | 0.002265   | 0.00164        |
| <b>Sb</b>                            | L0.0002        | L0.0002  | L0.0002  | L0.0002        | L0.0002  | 0.000195  | 0.00017    | 0.00012        |
| <b>Se</b>                            | 0.00025        | 0.00023  | 0.000275 | L0.0001        | 0.000225 | 0.0002685 | 0.0003     | 0.0001595      |
| <b>Si</b>                            | 1.08           | 6.51     | 7.405    | 2.36           | 0.595    | 4.765     | 4.93       | 2.1            |
| <b>Sr</b>                            | 0.10195        | 0.0768   | 0.09675  | 0.0233         | 0.0866   | 0.1009    | 0.119      | 0.02915        |
| <b>Sn</b>                            | L0.0002        | L0.0002  | L0.0002  | L0.0002        | L0.0002  | L0.0001   | L0.0001    | L0.0001        |
| <b>SO<sub>4</sub></b>                | 50.8           | 37.8     | 47.9     | 3.74           | 44.7     | 52        | 67.25      | 3.015          |
| <b>Te</b>                            | L0.0002        | L0.0002  | L0.0002  | L0.0002        | L0.0002  | L0.0002   | L0.0002    | L0.0002        |
| <b>Tl</b>                            | L0.0001        | L0.0001  | L0.0001  | L0.0001        | L0.0001  | 0.000015  | L0.00001   | L0.00001       |
| <b>Th</b>                            | L0.0001        | 0.00036  | 0.00031  | L0.0001        | L0.0001  | 0.000155  | L0.0001    | L0.0001        |
| <b>Ti</b>                            | 0.00578        | 0.0538   | 0.0487   | 0.00661        | 0.00328  | 0.02135   | 0.007475   | 0.0035         |
| <b>U</b>                             | 0.0015         | 0.001085 | 0.00127  | 0.00011        | 0.001365 | 0.001535  | 0.00177    | 0.0001115      |
| <b>V</b>                             | 0.00189        | 0.005085 | 0.005545 | 0.00077        | 0.001475 | 0.00346   | 0.002965   | 0.000785       |
| <b>Zn</b>                            | 0.0014         | 0.0048   | 0.0053   | 0.0038         | L0.002   | 0.004     | L0.003     | 0.00355        |
| <b>Zr</b>                            | L0.0004        | 0.00167  | 0.00149  | L0.0004        | L0.0004  | 0.000707  | 0.000336   | 0.0001625      |

**Table S2. Continued.** Listed as ppm.

|                                      | 2018<br>Spring | Summer     | Fall        | 2019<br>Winter | Spring      | Summer     | Fall       | 2020<br>Winter |
|--------------------------------------|----------------|------------|-------------|----------------|-------------|------------|------------|----------------|
| <b>Ag</b>                            | L0.00001       | L0.00001   | L0.00001    | L0.00001       | L0.00001    | L0.00001   | L0.00001   | L0.00001       |
| <b>Al</b>                            | 0.1485         | 0.383      | 0.274       | 0.062          | 0.1109      | 0.27125    | 0.55075    | 0.151          |
| <b>As</b>                            | 0.001745       | 0.002185   | 0.00301     | 0.001145       | 0.002095    | 0.0024725  | 0.00307    | 0.00102        |
| <b>Ba</b>                            | 0.02315        | 0.02885    | 0.03235     | 0.01185        | 0.0224      | 0.026625   | 0.0351     | 0.01265        |
| <b>Be</b>                            | L0.0001        | L0.0001    | L0.0001     | L0.0001        | L0.0001     | L0.0001    | L0.0001    | L0.0001        |
| <b>Bi</b>                            | L0.00005       | L0.00005   | L0.00005    | L0.00005       | L0.00005    | L0.00005   | L0.00005   | L0.00005       |
| <b>B</b>                             | 0.0275         | 0.026      | 0.035       | L0.01          | 0.0195      | 0.02725    | 0.0355     | L0.01          |
| <b>Cd</b>                            | 0.00001285     | 0.00001435 | 0.00001295  | 0.00003265     | 0.00000975  | 0.0000084  | 0.0000139  | 0.0000368      |
| <b>Ca</b>                            | 26.8           | 28.55      | 31          | 16.85          | 27.45       | 28.9       | 30.675     | 13.95          |
| <b>C (organic)</b>                   | 9.825          | 8.5        | 8.7         | 9.565          | 8.788333333 | 9.8025     | 9.1225     | 10.925         |
| <b>C (inorganic)</b>                 | 18.95          | 18.35      | 19.3        | 11.155         | 17.7        | 19.9       | 20.5875    | 9.45           |
| <b>C (total)</b>                     | 28.775         | 26.85      | 28          | 20.7           | 26.46666667 | 29.65      | 29.725     | 20.35          |
| <b>Cs</b>                            | 0.000036       | 0.0000615  | 0.0000465   | 0.0425         | 0.02775     | 0.05325    | 0.08075    | 0.1585         |
| <b>Cl</b>                            | 10.75          | 11.2       | 12.55       | 2.72           | 10.2025     | 10.8       | 9.7725     | 2.435          |
| <b>Cr</b>                            | 0.00032        | 0.00071    | 0.000875    | 0.000215       | 0.0002725   | 0.0005825  | 0.0009375  | 0.000475       |
| <b>Co</b>                            | 0.000125       | 0.00024    | 0.000195    | L0.1           | 0.135       | 0.2075     | 0.285      | L0.1           |
| <b>Cu</b>                            | 0.00175        | 0.002145   | 0.00212     | 0.00137        | 0.00186     | 0.0019025  | 0.00234    | 0.00158        |
| <b>Fe</b>                            | 0.1685         | 0.45       | 0.326       | 0.062          | 0.135       | 0.3175     | 0.47975    | 0.2285         |
| <b>K</b>                             | 2.98           | 3.6        | 3.795       | 1.067          | 3.8225      | 3.985      | 4.0925     | 1.106          |
| <b>Li</b>                            | 0.01295        | 0.01315    | 0.01775     | 0.00231        | 0.0127      | 0.013825   | 0.01585    | 0.002055       |
| <b>Mg</b>                            | 14.2           | 15.95      | 17.1        | 5.54           | 13.9        | 14.175     | 15.4       | 4.705          |
| <b>Mn</b>                            | 0.02705        | 0.0337     | 0.02735     | 0.003105       | 0.0192      | 0.0422     | 0.024825   | 0.006015       |
| <b>Hg</b>                            | N/A            | N/A        | N/A         | L0.000005      | 0.000925    | 0.0011875  | 0.00126125 | L0.000005      |
| <b>Mo</b>                            | 0.0007175      | 0.0008535  | 0.0010595   | 0.000222       | 0.000791    | 0.0009255  | 0.00100125 | 0.0002005      |
| <b>Ni</b>                            | 0.00156        | 0.002135   | 0.00184     | 0.00077        | 0.0019475   | 0.00207    | 0.0020675  | 0.00096        |
| <b>N</b>                             | 0.44           | 0.5725     | 0.696666667 | 0.67           | 0.506666667 | 0.6175     | 0.84125    | 0.585          |
| <b>N (Kjeldahl)</b>                  | 0.4275         | 0.46       | 0.656666667 | 0.515          | 0.495       | 0.5825     | 0.7525     | 0.5            |
| <b>NH<sub>3</sub></b>                | 0.011          | 0.0185     | 0.015666667 | L0.01          | L0.01       | 0.01625    | 0.036375   | L0.01          |
| <b>NO<sub>2</sub>+NO<sub>3</sub></b> | 0.0197         | 0.111075   | 0.0423      | 0.1555         | 0.01105     | 0.0366     | 0.091125   | 0.08355        |
| <b>Na</b>                            | 14.8           | 15.4       | 17.45       | 3.475          | 13.75       | 13.9       | 13.725     | 3.205          |
| <b>O</b>                             | 10.5           | 8.45       | 11.1        | 14.4           | 9.75        | 7.3        | 9.5        | 16.3           |
| <b>P</b>                             | 0.0569         | 0.093925   | 0.111733333 | 0.02545        | 0.064783333 | 0.10085    | 0.135375   | 0.0232         |
| <b>P (dissolved)</b>                 | 0.0359         | 0.06775    | 0.088533333 | 0.02           | 0.04735     | 0.074375   | 0.105425   | 0.0164         |
| <b>P (inorganic)</b>                 | 0.04665        | 0.0807     | 0.1012      | 0.0184         | 0.06505     | 0.0837625  | 0.120125   | 0.0181         |
| <b>P (particulate)</b>               | 0.018          | 0.02905    | 0.0276      | 0.00545        | 0.019075    | 0.031125   | 0.047275   | 0.00675        |
| <b>P (reactive)</b>                  | 0.030475       | 0.0617     | 0.082966667 | 0.01485        | 0.03215     | 0.0574     | 0.103775   | 0.01375        |
| <b>P (acid hydrolizable)</b>         | 0.01615        | 0.019      | 0.0184      | L0.0042        | 0.0329      | 0.026375   | 0.017525   | 0.00765        |
| <b>Pb</b>                            | 0.0001105      | 0.000227   | 0.000278    | 0.000074       | 0.000101    | 0.00017375 | 0.00031525 | 0.0001955      |
| <b>Rb</b>                            | 0.001705       | 0.00244    | 0.00228     | 0.00159        | 0.00155     | 0.00207    | 0.002655   | 0.001755       |
| <b>Sb</b>                            | 0.00011        | 0.00013    | 0.000185    | 0.00026        | 0.00013     | 0.00014    | 0.0001775  | 0.0001         |
| <b>Se</b>                            | 0.000234       | 0.000244   | 0.0002945   | 0.0001185      | 0.00021275  | 0.00022725 | 0.0002935  | 0.0001215      |
| <b>Si</b>                            | 2.27           | 4.565      | 5.34        | 2.585          | 0.8175      | 3.3125     | 7.525      | 2.05           |
| <b>Sr</b>                            | 0.089          | 0.0927     | 0.111       | 0.03275        | 0.088475    | 0.0966     | 0.10735    | 0.03075        |
| <b>Sn</b>                            | L0.0001        | L0.0001    | L0.0001     | L0.0001        | L0.0001     | L0.0001    | 0.0001325  | 0.00013        |
| <b>SO<sub>4</sub></b>                | 46.45          | 51.15      | 60.5        | 4.86           | 43.225      | 52.25      | 56.5       | 4.615          |
| <b>Te</b>                            | L0.0002        | L0.0002    | L0.0002     | L0.0002        | L0.0002     | L0.0002    | L0.0002    | L0.0002        |
| <b>Tl</b>                            | L0.00001       | 0.000013   | 0.000011    | L0.00001       | L0.00001    | 0.00001    | 0.000014   | L0.00001       |
| <b>Th</b>                            | L0.0001        | L0.0001    | L0.0001     | L0.0001        | L0.0001     | L0.0001    | 0.0001425  | L0.0001        |
| <b>Ti</b>                            | 0.00464        | 0.01244    | 0.008565    | 0.00143        | 0.0035525   | 0.0083225  | 0.018635   | 0.004565       |
| <b>U</b>                             | 0.001125       | 0.001085   | 0.00141     | 0.0001365      | 0.00105725  | 0.001355   | 0.00146    | 0.0001385      |
| <b>V</b>                             | 0.001575       | 0.002815   | 0.00299     | 0.00064        | 0.001995    | 0.0025025  | 0.004325   | 0.00075        |
| <b>Zn</b>                            | L0.003         | L0.003     | 0.00335     | 0.0067         | L0.003      | L0.003     | 0.005925   | 0.0091         |
| <b>Zr</b>                            | 0.000222       | 0.0003375  | 0.0003395   | 0.000123       | 0.000188    | 0.0002975  | 0.000795   | 0.000205       |

*L, Less than the detection limit listed*

**Table S3. Media composition used to cultivate different groups of microorganisms.** Values are listed as g/L unless otherwise noted. All were adjusted to pH 5.9 prior to autoclaving.

| Component                       | RO       | OM          | BG-11    | PNSM     | PM       | DM       |
|---------------------------------|----------|-------------|----------|----------|----------|----------|
| MgCl <sub>2</sub>               | -        | -           | -        | 0.5      | -        | -        |
| MgSO <sub>4</sub>               | 0.50     | 0.50        | 0.0750   | -        | -        | 0.50     |
| KH <sub>2</sub> PO <sub>4</sub> | 0.30     | 0.30        | 0.0300   | 0.3      | -        | 0.30     |
| NH <sub>4</sub> Cl              | 0.30     | 0.30        | -        | 0.3      | -        | 0.30     |
| NaNO <sub>3</sub>               | -        | -           | 0.1500   | -        | -        | -        |
| KCl                             | 0.30     | 0.30        | -        | -        | -        | -        |
| CaCl <sub>2</sub>               | 0.05     | 0.05        | -        | 0.1      | -        | 0.10     |
| Na <sub>2</sub> CO <sub>3</sub> | -        | -           | 0.0200   | -        | -        | -        |
| NaAcetate                       | 1.00     | <b>0.10</b> | -        | 1.0      | 0.50     | -        |
| NaCitrate                       | -        | -           | 0.0060   | -        | -        | -        |
| Malic Acid                      | -        | -           | -        | 0.3      | -        | -        |
| Na <sub>2</sub> CO <sub>3</sub> | -        | -           | 0.0200   | -        | -        | -        |
| Na <sub>2</sub> -EDTA           | -        | -           | 0.0001   | -        | -        | -        |
| Ferric Ammonium Citrate         | -        | -           | 0.0060   | -        | -        | -        |
| Potato Extract*                 | -        | -           | -        | -        | *        | -        |
| Yeast Extract                   | 1.00     | <b>0.05</b> | -        | 0.2      | 1.00     | -        |
| Bacto Peptone                   | 0.50     | -           | -        | -        | -        | -        |
| Casamino Acids                  | 0.50     | <b>0.05</b> | -        | -        | -        | -        |
| Trace Elements                  | 2 mL     | 2 mL        | 2 mL     | 2 mL     | 2 mL     | -        |
| Vitamins                        | 2 mL     | 2 mL        | 2 mL     | 2 mL     | 2 mL     | -        |
| <i>Added after autoclaving:</i> |          |             |          |          |          |          |
| Cystine (0.3mM)                 | -        | -           | -        | 5 mL     | -        | -        |
| Methionine (0.3mM)              | -        | -           | -        | 5 mL     | -        | -        |
| ph adjustments                  | <b>A</b> | <b>A</b>    | <b>B</b> | <b>C</b> | <b>B</b> | <b>D</b> |

**A**, 4.0uL/mL 0.5N NaOH added after autoclaving to achieve 7.5 pH

**B**, Self-adjusts to pH 7.5 during autoclaving process

**C**, 3.0uL/mL 0.5N NaOH added after autoclaving to achieve 7.5 pH

**D**, 2.4uL/mL 0.5N NaOH added after autoclaving to achieve 7.5 pH

\* 1L of water per kg of peeled potatoes (organic better), cut in halves or quarters depending on size, enough water to cover all by 1-2 cm. Boiled for 1 h, strained water through cotton and dilute to twice volume.

| Trace Elements                    | g/L   | Essential Vitamins                               | g/L  |
|-----------------------------------|-------|--------------------------------------------------|------|
| FeSO <sub>4</sub>                 | 0.300 | Nicotinic Acid                                   | 0.40 |
| MnCl <sub>2</sub>                 | 0.003 | Thiamin                                          | 0.40 |
| CoCl <sub>2</sub>                 | 0.005 | Biotin                                           | 0.08 |
| CuCl <sub>2</sub>                 | 0.001 | B <sub>12</sub>                                  | 0.02 |
| NiCl <sub>2</sub>                 | 0.002 |                                                  |      |
| Na <sub>2</sub> MoO <sub>4</sub>  | 0.003 | <b>Filter sterilize solution and refrigerate</b> |      |
| ZnSO <sub>4</sub>                 | 0.005 |                                                  |      |
| H <sub>3</sub> BO <sub>3</sub>    | 0.002 |                                                  |      |
| <b>In 0.5L Adjust to 3.0pH</b>    |       |                                                  |      |
| <b>Fill to 1L and refrigerate</b> |       |                                                  |      |

**Table S4 (1/7). Enumeration data from all individual sites and seasons.** Bacterial counts from liquid and sediment listed as means with standard deviation of triplicates with CFU/mL or CFU/g, respectfully.

| Year   | Season | Medium          |                           | 1                         |                           | 2                         |                           | 3                         |                           | 4                         |                           |                           |                           |
|--------|--------|-----------------|---------------------------|---------------------------|---------------------------|---------------------------|---------------------------|---------------------------|---------------------------|---------------------------|---------------------------|---------------------------|---------------------------|
|        |        |                 |                           | liquid                    | sediment                  | liquid                    | sediment                  | liquid                    | sediment                  | liquid                    | sediment                  |                           |                           |
| 2016   | Spring | RO              | Total                     | 6.55±0.75×10 <sup>3</sup> | 2.11±0.54×10 <sup>5</sup> | 3.40±0.40×10 <sup>3</sup> | 1.60±0.07×10 <sup>4</sup> | 1.01±0.22×10 <sup>4</sup> | 1.42±0.03×10 <sup>5</sup> | 5.10±1.00×10 <sup>3</sup> | 3.45±0.15×10 <sup>3</sup> |                           |                           |
|        |        |                 | Pigmented                 | 1.90±0.40×10 <sup>3</sup> | 2.40±2.30×10 <sup>4</sup> | 1.40±0.20×10 <sup>3</sup> | 3.55±0.05×10 <sup>3</sup> | 1.85±0.45×10 <sup>3</sup> | 2.95±0.45×10 <sup>4</sup> | 3.00±0.00×10 <sup>2</sup> | 1.50±0.20×10 <sup>3</sup> |                           |                           |
|        |        |                 | AAP                       | 2.00×10 <sup>2</sup>      | 1.17×10 <sup>4</sup>      | 3.77×10 <sup>2</sup>      | 1.08×10 <sup>3</sup>      | 4.32×10 <sup>2</sup>      | 1.12×10 <sup>4</sup>      | 8.68×10 <sup>1</sup>      | 1.33×10 <sup>3</sup>      |                           |                           |
|        |        | OM              | Total                     | 7.50±0.70×10 <sup>4</sup> | 1.74±0.47×10 <sup>6</sup> | 4.25±1.75×10 <sup>4</sup> | 1.31±0.42×10 <sup>5</sup> | 2.85±0.46×10 <sup>4</sup> | 4.85±0.75×10 <sup>5</sup> | N/A                       | 4.65±1.65×10 <sup>5</sup> |                           |                           |
|        |        |                 | Pigmented                 | 4.50±1.50×10 <sup>3</sup> | 2.85±0.75×10 <sup>5</sup> | 8.00±1.00×10 <sup>3</sup> | 2.80±1.00×10 <sup>4</sup> | 4.30±1.30×10 <sup>3</sup> | 9.00±2.00×10 <sup>4</sup> | 1.90±0.40×10 <sup>3</sup> | 5.00±1.00×10 <sup>4</sup> |                           |                           |
|        |        |                 | AAP                       | 7.50×10 <sup>2</sup>      | 3.29×10 <sup>4</sup>      | 4.44×10 <sup>2</sup>      | 2.47×10 <sup>4</sup>      | 3.25×10 <sup>2</sup>      | 3.46×10 <sup>3</sup>      | 4.75×10 <sup>1</sup>      | 1.43×10 <sup>4</sup>      |                           |                           |
|        |        | RO <sub>T</sub> | Total                     | 2.00±1.00×10 <sup>1</sup> | 2.31±0.36×10 <sup>3</sup> | 5.00±0.00×10 <sup>1</sup> | 4.00±0.00×10 <sup>1</sup> | 1.30±0.00×10 <sup>2</sup> | 4.70±0.00×10 <sup>3</sup> | 4.00±0.00×10 <sup>1</sup> | 7.60±0.00×10 <sup>2</sup> |                           |                           |
|        |        |                 | Pigmented                 | 1.50±0.50×10 <sup>1</sup> | 1.87±0.17×10 <sup>3</sup> | 4.00±0.00×10 <sup>1</sup> | 4.00±0.00×10 <sup>1</sup> | 1.30±0.00×10 <sup>2</sup> | 1.50±0.00×10 <sup>3</sup> | 3.00±0.00×10 <sup>1</sup> | 5.10±0.00×10 <sup>2</sup> |                           |                           |
|        |        |                 | AAP                       | 0                         | 6.57×10 <sup>2</sup>      | 0                         | 3.79×10 <sup>1</sup>      | 1.08×10 <sup>1</sup>      | 1.00×10 <sup>3</sup>      | 9.00×10 <sup>0</sup>      | 1.52×10 <sup>2</sup>      |                           |                           |
|        |        | Potato          | Total                     | 8.90±0.00×10 <sup>2</sup> | 5.45±1.45×10 <sup>4</sup> | 9.10±0.00×10 <sup>2</sup> | 3.50±0.00×10 <sup>3</sup> | 2.75±0.00×10 <sup>3</sup> | 4.60±0.00×10 <sup>4</sup> | 1.64±0.00×10 <sup>3</sup> | 8.91±0.00×10 <sup>3</sup> |                           |                           |
|        |        |                 | Pigmented                 | 2.60±0.10×10 <sup>2</sup> | 1.35±0.75×10 <sup>4</sup> | 3.20±0.00×10 <sup>2</sup> | 1.00±0.00×10 <sup>3</sup> | 3.30±0.00×10 <sup>2</sup> | 6.00±0.00×10 <sup>3</sup> | 2.30±0.00×10 <sup>2</sup> | 2.80±0.00×10 <sup>2</sup> |                           |                           |
|        |        |                 | AAP                       | 1.73×10 <sup>1</sup>      | 3.46×10 <sup>2</sup>      | 3.37×10 <sup>1</sup>      | 5.00×10 <sup>1</sup>      | 6.60×10 <sup>1</sup>      | 3.53×10 <sup>2</sup>      | 2.56×10 <sup>1</sup>      | 6.53×10 <sup>1</sup>      |                           |                           |
|        |        | BG-11           | Total                     | 6.45±0.25×10 <sup>4</sup> | 7.50±1.50×10 <sup>5</sup> | 7.65±0.25×10 <sup>4</sup> | 4.16±1.98×10 <sup>4</sup> | 1.70±1.41×10 <sup>4</sup> | 3.02±0.14×10 <sup>5</sup> | 5.15±1.25×10 <sup>4</sup> | 3.25±0.15×10 <sup>5</sup> |                           |                           |
|        |        |                 | AOP                       | 1.50±1.50×10 <sup>1</sup> | 4.60±0.60×10 <sup>2</sup> | 8.50±5.50×10 <sup>1</sup> | 1.00±0.30×10 <sup>3</sup> | 6.00±2.00×10 <sup>2</sup> | 2.05±0.05×10 <sup>4</sup> | 5.00±5.00×10 <sup>1</sup> | 5.00±5.00×10 <sup>2</sup> |                           |                           |
|        |        |                 | PNSm                      | Total                     | 4.35±2.25×10 <sup>2</sup> | 7.40±0.00×10 <sup>3</sup> | 2.40±0.00×10 <sup>2</sup> | 9.10±0.00×10 <sup>2</sup> | 1.70±0.00×10 <sup>2</sup> | 6.30±0.00×10 <sup>3</sup> | 9.00±0.00×10 <sup>1</sup> | 8.20±0.00×10 <sup>2</sup> |                           |
|        |        | Summer          | AnAnP                     |                           | 0                         | 0                         | 0                         | 0                         | 0                         | 0                         | 0                         | 0                         |                           |
|        |        |                 |                           | RO                        | Total                     | 5.95±0.85×10 <sup>4</sup> | 2.80±0.80×10 <sup>5</sup> | 4.85±0.35×10 <sup>3</sup> | 5.15±0.55×10 <sup>6</sup> | 6.65±0.55×10 <sup>3</sup> | 9.60±2.20×10 <sup>3</sup> | 7.15±3.75×10 <sup>3</sup> | 1.37±0.04×10 <sup>4</sup> |
|        |        |                 |                           | Pigmented                 | 7.50±1.50×10 <sup>3</sup> | 8.50±6.50×10 <sup>4</sup> | 1.50±0.30×10 <sup>3</sup> | 1.80±1.00×10 <sup>6</sup> | 3.25±1.15×10 <sup>3</sup> | 3.95±0.35×10 <sup>3</sup> | 5.05±2.15×10 <sup>3</sup> | 1.95±0.25×10 <sup>3</sup> |                           |
|        |        |                 | AAP                       |                           | 1.32×10 <sup>3</sup>      | 1.23×10 <sup>4</sup>      | 3.46×10 <sup>2</sup>      | 8.00×10 <sup>4</sup>      | 8.92×10 <sup>2</sup>      | 7.29×10 <sup>2</sup>      | 1.36×10 <sup>3</sup>      | 3.78×10 <sup>2</sup>      |                           |
|        |        |                 |                           | OM                        | Total                     | 4.05±0.45×10 <sup>5</sup> | 5.05±0.15×10 <sup>5</sup> | 4.05±1.45×10 <sup>4</sup> | 6.10±0.30×10 <sup>7</sup> | 2.02±1.95×10 <sup>4</sup> | 4.80±0.40×10 <sup>4</sup> | 1.37±0.01×10 <sup>4</sup> | 8.00±1.00×10 <sup>4</sup> |
|        |        |                 |                           | Pigmented                 | 1.50±0.30×10 <sup>5</sup> | 1.25±0.65×10 <sup>5</sup> | 1.75±0.95×10 <sup>4</sup> | 2.35±0.55×10 <sup>7</sup> | 2.05±0.25×10 <sup>3</sup> | 1.30±0.70×10 <sup>4</sup> | 5.30±1.80×10 <sup>3</sup> | 2.30±0.30×10 <sup>4</sup> |                           |
|        |        |                 | AAP                       |                           | 1.11×10 <sup>4</sup>      | 1.39×10 <sup>4</sup>      | 1.22×10 <sup>3</sup>      | 0                         | 1.58×10 <sup>2</sup>      | 5.80×10 <sup>2</sup>      | 4.16×10 <sup>2</sup>      | 2.17×10 <sup>3</sup>      |                           |
|        |        |                 |                           | RO <sub>T</sub>           | Total                     | 1.55±0.00×10 <sup>3</sup> | 3.10±0.00×10 <sup>3</sup> | 8.70±0.00×10 <sup>2</sup> | 2.41±0.00×10 <sup>4</sup> | 2.60±0.00×10 <sup>2</sup> | 9.60±0.00×10 <sup>2</sup> | 2.30±0.00×10 <sup>2</sup> | 5.30±0.00×10 <sup>2</sup> |
|        |        |                 |                           | Pigmented                 | 1.39±0.00×10 <sup>3</sup> | 3.10±0.00×10 <sup>3</sup> | 8.70±0.00×10 <sup>2</sup> | 2.41±0.00×10 <sup>4</sup> | 3.10±0.00×10 <sup>2</sup> | 8.10±0.00×10 <sup>2</sup> | 2.30±0.00×10 <sup>2</sup> | 4.90±0.00×10 <sup>2</sup> |                           |
|        | AAP    |                 |                           | 0                         | 0                         | 3.00×10 <sup>1</sup>      | 0                         | 2.21×10 <sup>1</sup>      | 9.95×10 <sup>1</sup>      | 4.26×10 <sup>1</sup>      | 0                         |                           |                           |
|        |        |                 | Potato                    | Total                     | 7.90±0.00×10 <sup>3</sup> | 4.40±0.00×10 <sup>4</sup> | 4.00±0.00×10 <sup>2</sup> | 2.41±0.00×10 <sup>4</sup> | 1.05±0.00×10 <sup>3</sup> | 2.24±0.00×10 <sup>3</sup> | 1.60±0.00×10 <sup>2</sup> | 9.10±0.00×10 <sup>3</sup> |                           |
|        |        |                 | Pigmented                 | 2.70±0.00×10 <sup>3</sup> | 6.00±0.00×10 <sup>3</sup> | 1.90±0.00×10 <sup>2</sup> | 2.41±0.00×10 <sup>4</sup> | 3.70±0.00×10 <sup>2</sup> | 1.02±0.00×10 <sup>3</sup> | 8.00±0.00×10 <sup>1</sup> | 1.00±0.00×10 <sup>3</sup> |                           |                           |
|        | Fall   | AAP             |                           | 6.75×10 <sup>2</sup>      | 7.50×10 <sup>2</sup>      | 3.45×10 <sup>1</sup>      | 0                         | 0                         | 9.71×10 <sup>1</sup>      | 0                         | 0                         |                           |                           |
|        |        |                 | BG-11                     | Total                     | 1.07±0.00×10 <sup>6</sup> | 7.50±0.00×10 <sup>5</sup> | 5.50±0.00×10 <sup>5</sup> | 4.10±0.00×10 <sup>5</sup> | 9.00±0.00×10 <sup>5</sup> | 1.49±0.00×10 <sup>5</sup> | 7.20±0.00×10 <sup>3</sup> | 1.58±0.00×10 <sup>5</sup> |                           |
|        |        |                 | AOP                       | 2.20±0.00×10 <sup>3</sup> | 2.20±0.00×10 <sup>3</sup> | 3.70±0.00×10 <sup>2</sup> | 2.00±0.00×10 <sup>4</sup> | 1.40±0.00×10 <sup>4</sup> | 4.90±0.00×10 <sup>2</sup> | 4.60±0.00×10 <sup>2</sup> | 5.00±0.00×10 <sup>2</sup> |                           |                           |
|        |        | PNSm            | Total                     | 1.88±0.00×10 <sup>3</sup> | 1.27±0.00×10 <sup>3</sup> | 9.80±0.00×10 <sup>2</sup> | 4.40±0.00×10 <sup>4</sup> | 1.20±0.00×10 <sup>2</sup> | 1.90±0.00×10 <sup>2</sup> | 8.40±0.00×10 <sup>2</sup> | 4.50±0.00×10 <sup>3</sup> |                           |                           |
|        |        |                 | AnAnP                     |                           | 3.00±0.00×10 <sup>1</sup> | 0                         | 0                         | 0                         | 0                         | 0                         | 0                         | 0                         |                           |
|        |        |                 | RO                        | Total                     | 7.75±0.35×10 <sup>3</sup> | 2.44±0.14×10 <sup>4</sup> | 1.08±0.13×10 <sup>4</sup> | 5.35±0.35×10 <sup>3</sup> | 8.10±3.40×10 <sup>3</sup> | 8.95±0.25×10 <sup>3</sup> | 6.65±1.45×10 <sup>2</sup> | 1.07±0.55×10 <sup>5</sup> |                           |
|        |        | Pigmented       |                           | 2.75±0.45×10 <sup>3</sup> | 7.50±0.50×10 <sup>3</sup> | 3.00±0.20×10 <sup>3</sup> | 1.15±0.45×10 <sup>3</sup> | 1.30±0.10×10 <sup>3</sup> | 2.10±0.60×10 <sup>3</sup> | 2.65±0.65×10 <sup>2</sup> | 2.50±0.50×10 <sup>4</sup> |                           |                           |
|        |        |                 | AAP                       | 2.43×10 <sup>2</sup>      | 4.69×10 <sup>2</sup>      | 4.44×10 <sup>2</sup>      | 3.38×10 <sup>1</sup>      | 1.63×10 <sup>2</sup>      | 1.17×10 <sup>2</sup>      | 5.68×10 <sup>1</sup>      | 0                         |                           |                           |
|        |        |                 | OM                        | Total                     | 5.95±0.65×10 <sup>4</sup> | 2.06±0.15×10 <sup>5</sup> | 4.62±0.35×10 <sup>4</sup> | 7.90±0.10×10 <sup>4</sup> | 1.80±0.09×10 <sup>4</sup> | 1.31±0.19×10 <sup>4</sup> | 2.18±0.15×10 <sup>3</sup> | 2.04±0.24×10 <sup>6</sup> |                           |
|        |        | Pigmented       |                           | 4.50±1.50×10 <sup>3</sup> | 1.80±0.30×10 <sup>4</sup> | 4.00±0.10×10 <sup>3</sup> | 5.00±1.00×10 <sup>3</sup> | 1.50±0.20×10 <sup>3</sup> | 1.10±0.30×10 <sup>3</sup> | 5.00±0.30×10 <sup>2</sup> | 5.50±0.50×10 <sup>5</sup> |                           |                           |
|        |        |                 | AAP                       | 5.63×10 <sup>2</sup>      | 0                         | 1.74×10 <sup>2</sup>      | 2.38×10 <sup>2</sup>      | 9.38×10 <sup>1</sup>      | 7.33×10 <sup>1</sup>      | 4.55×10 <sup>1</sup>      | 0                         |                           |                           |
|        |        |                 | RO <sub>T</sub>           | Total                     | 3.80±0.00×10 <sup>2</sup> | 5.00±0.00×10 <sup>3</sup> | 1.18±0.00×10 <sup>3</sup> | 4.00±0.00×10 <sup>2</sup> | 1.10±0.00×10 <sup>2</sup> | 9.80±0.00×10 <sup>2</sup> | 6.00±0.00×10 <sup>1</sup> | 1.00±0.00×10 <sup>4</sup> |                           |
|        | 2017   | Spring          | RO                        | Total                     | 7.63±2.10×10 <sup>3</sup> | 8.67±0.80×10 <sup>4</sup> | 1.71±0.27×10 <sup>4</sup> | 1.84±0.00×10 <sup>4</sup> | 2.20±0.04×10 <sup>4</sup> | 5.47±0.90×10 <sup>5</sup> | 1.53±0.05×10 <sup>4</sup> | 9.40±0.75×10 <sup>5</sup> |                           |
|        |        |                 |                           | Pigmented                 | 2.27±0.45×10 <sup>3</sup> | 4.33±1.85×10 <sup>4</sup> | 1.83±0.15×10 <sup>3</sup> | 2.17±0.40×10 <sup>3</sup> | 5.40±1.00×10 <sup>3</sup> | 1.09±0.04×10 <sup>4</sup> | 1.09±0.04×10 <sup>4</sup> | 3.37±0.70×10 <sup>5</sup> |                           |
|        |        |                 |                           | AAP                       | 1.62×10 <sup>2</sup>      | 4.48×10 <sup>3</sup>      | 0                         | 9.85×10 <sup>1</sup>      | 2.08×10 <sup>2</sup>      | 2.73×10 <sup>3</sup>      | 2.73×10 <sup>3</sup>      | 1.02×10 <sup>5</sup>      |                           |
|        |        |                 | OM                        | Total                     | 1.63±0.33×10 <sup>4</sup> | 2.20±0.27×10 <sup>5</sup> | 6.93±1.20×10 <sup>4</sup> | 1.63±0.30×10 <sup>4</sup> | 5.79±0.16×10 <sup>4</sup> | 8.77±0.10×10 <sup>5</sup> | 2.49±0.05×10 <sup>4</sup> | 1.91±0.25×10 <sup>6</sup> |                           |
|        |        |                 |                           | Pigmented                 | 4.40±0.85×10 <sup>3</sup> | 5.05±0.25×10 <sup>4</sup> | 1.10±0.65×10 <sup>4</sup> | 4.70±1.70×10 <sup>3</sup> | 7.83±0.90×10 <sup>3</sup> | 4.33±0.65×10 <sup>5</sup> | 1.19±0.13×10 <sup>4</sup> | 3.40±0.00×10 <sup>5</sup> |                           |
|        |        |                 |                           | AAP                       | 5.50×10 <sup>2</sup>      | 0                         | 5.50×10 <sup>2</sup>      | 2.14×10 <sup>2</sup>      | 5.11×10 <sup>3</sup>      | 1.63×10 <sup>5</sup>      | 6.78×10 <sup>3</sup>      | 8.50×10 <sup>4</sup>      |                           |
|        |        |                 | RO <sub>T</sub>           | Total                     | 6.67±0.00×10 <sup>0</sup> | 2.47±1.70×10 <sup>2</sup> | 6.23±0.95×10 <sup>2</sup> | 5.43±0.25×10 <sup>2</sup> | 4.47±2.25×10 <sup>2</sup> | 2.67±0.55×10 <sup>2</sup> | 1.40±0.15×10 <sup>2</sup> | 1.07±0.55×10 <sup>3</sup> |                           |
|        |        |                 |                           | Pigmented                 | 3.33±5.00×10 <sup>0</sup> | 2.37±1.55×10 <sup>2</sup> | 4.90±0.65×10 <sup>2</sup> | 4.87±0.35×10 <sup>2</sup> | 3.73±3.20×10 <sup>2</sup> | 4.27±0.30×10 <sup>2</sup> | 1.23±0.10×10 <sup>2</sup> | 8.33±3.00×10 <sup>2</sup> |                           |
|        |        |                 |                           | AAP                       | 0                         | 1.18×10 <sup>2</sup>      | 2.45×10 <sup>2</sup>      | 3.35×10 <sup>2</sup>      | 1.87×10 <sup>2</sup>      | 1.42×10 <sup>2</sup>      | 5.29×10 <sup>1</sup>      | 7.69×10 <sup>2</sup>      |                           |
| Potato |        |                 | Total                     | 6.80±0.45×10 <sup>3</sup> | 1.08±0.13×10 <sup>4</sup> | 2.13±0.30×10 <sup>3</sup> | 1.00±0.09×10 <sup>5</sup> | 5.97±0.85×10 <sup>3</sup> | 2.83±0.30×10 <sup>3</sup> | 6.10±1.40×10 <sup>3</sup> | 3.07±0.05×10 <sup>4</sup> |                           |                           |
|        |        |                 | Pigmented                 | 8.40±0.70×10 <sup>3</sup> | 1.38±0.09×10 <sup>4</sup> | 4.57±0.65×10 <sup>3</sup> | 1.47±0.04×10 <sup>5</sup> | 2.12±0.81×10 <sup>4</sup> | 3.07±0.20×10 <sup>4</sup> | 2.45±0.06×10 <sup>4</sup> | 3.37±0.10×10 <sup>4</sup> |                           |                           |
|        |        |                 | AAP                       | 1.20×10 <sup>3</sup>      | 5.52×10 <sup>2</sup>      | 4.57×10 <sup>2</sup>      | 3.50×10 <sup>4</sup>      | 1.18×10 <sup>3</sup>      | 5.12×10 <sup>3</sup>      | 5.52×10 <sup>3</sup>      | 3.37×10 <sup>3</sup>      |                           |                           |
| BG-11  | Total  |                 | 1.58±0.12×10 <sup>4</sup> | 1.42±0.10×10 <sup>5</sup> | 1.25±0.00×10 <sup>5</sup> | 1.80±0.00×10 <sup>5</sup> | 1.42±0.03×10 <sup>5</sup> | 1.10±0.04×10 <sup>6</sup> | 3.09±0.40×10 <sup>4</sup> | 1.75±0.21×10 <sup>6</sup> |                           |                           |                           |
|        | AOP    |                 | 3.33±5.00×10 <sup>0</sup> | 3.93±0.60×10 <sup>2</sup> | 9.85±9.75×10 <sup>3</sup> | 1.45±0.05×10 <sup>3</sup> | 2.23±0.45×10 <sup>2</sup> | 1.83±0.10×10 <sup>4</sup> | 9.00±0.00×10 <sup>1</sup> | 2.89±3.00×10 <sup>3</sup> |                           |                           |                           |
|        | PNSm   |                 | Total                     | 9.67±3.50×10 <sup>1</sup> | 4.00±0.80×10 <sup>2</sup> | 9.70±1.20×10 <sup>2</sup> | 1.66±1.04×10 <sup>3</sup> | 9.37±1.10×10 <sup>2</sup> | 2.17±0.44×10 <sup>3</sup> | 1.77±0.05×10 <sup>2</sup> | 1.76±0.24×10 <sup>4</sup> |                           |                           |
| 2017   | Spring |                 | AnAnP                     |                           | 3.33±5.00×10 <sup>0</sup> | 7.00±3.50×10 <sup>1</sup> | 3.00±1.50×10 <sup>1</sup> | 2.73±2.10×10 <sup>2</sup> | 0                         | 6.73±0.30×10 <sup>2</sup> | 3.33±0.00×10 <sup>0</sup> | 5.93±5.35×10 <sup>3</sup> |                           |
|        |        |                 |                           | RO                        | Total                     | 7.63±2.10×10 <sup>3</sup> | 8.67±0.80×10 <sup>4</sup> | 1.71±0.27×10 <sup>4</sup> | 1.84±0.00×10 <sup>4</sup> | 2.20±0.04×10 <sup>4</sup> | 5.47±0.90×10 <sup>5</sup> | 1.53±0.05×10 <sup>4</sup> | 9.40±0.75×10 <sup>5</sup> |
|        |        |                 |                           | Pigmented                 | 2.27±0.45×10 <sup>3</sup> | 4.33±1.85×10 <sup>4</sup> | 1.83±0.15×10 <sup>3</sup> | 2.17±0.40×10 <sup>3</sup> | 5.40±1.00×10 <sup>3</sup> | 1.09±0.04×10 <sup>4</sup> | 1.09±0.04×10 <sup>4</sup> | 3.37±0.70×10 <sup>5</sup> |                           |
|        |        |                 | AAP                       |                           | 1.62×10 <sup>2</sup>      | 4.48×10 <sup>3</sup>      | 0                         | 9.85×10 <sup>1</sup>      | 2.08×10 <sup>2</sup>      | 2.73×10 <sup>3</sup>      | 2.73×10 <sup>3</sup>      | 1.02×10 <sup>5</sup>      |                           |
|        |        |                 |                           | OM                        | Total                     | 1.63±0.33×10 <sup>4</sup> | 2.20±0.27×10 <sup>5</sup> | 6.93±1.20×10 <sup>4</sup> | 1.63±0.30×10 <sup>4</sup> | 5.79±0.16×10 <sup>4</sup> | 8.77±0.10×10 <sup>5</sup> | 2.49±0.05×10 <sup>4</sup> | 1.91±0.25×10 <sup>6</sup> |
|        |        |                 |                           | Pigmented                 | 4.40±0.85×10 <sup>3</sup> | 5.05±0.25×10 <sup>4</sup> | 1.10±0.65×10 <sup>4</sup> | 4.70±1.70×10 <sup>3</sup> | 7.83±0.90×10 <sup>3</sup> | 4.33±0.65×10 <sup>5</sup> | 1.19±0.13×10 <sup>4</sup> | 3.40±0.00×10 <sup>5</sup> |                           |
|        |        |                 | AAP                       |                           | 5.50×10 <sup>2</sup>      | 0                         | 5.50×10 <sup>2</sup>      | 2.14×10 <sup>2</sup>      | 5.11×10 <sup>3</sup>      | 1.63×10 <sup>5</sup>      | 6.78×10 <sup>3</sup>      | 8.50×10 <sup>4</sup>      |                           |
|        |        |                 |                           | RO <sub>T</sub>           | Total                     | 6.67±0.00×10 <sup>0</sup> | 2.47±1.70×10 <sup>2</sup> | 6.23±0.95×10 <sup>2</sup> | 5.43±0.25×10 <sup>2</sup> | 4.47±2.25×10 <sup>2</sup> | 2.67±0.55×10 <sup>2</sup> | 1.40±0.15×10 <sup>2</sup> | 1.07±0.55×10 <sup>3</sup> |
|        |        |                 |                           | Pigmented                 | 3.33±5.00×10 <sup>0</sup> | 2.37±1.55×10 <sup>2</sup> | 4.90±0.65×10 <sup>2</sup> | 4.87±0.35×10 <sup>2</sup> | 3.73±3.20×10 <sup>2</sup> | 4.27±0.30×10 <sup>2</sup> | 1.23±0.10×10 <sup>2</sup> | 8.33±3.00×10 <sup>2</sup> |                           |
|        |        | AAP             |                           | 0                         | 1.18×10 <sup>2</sup>      | 2.45×10 <sup>2</sup>      | 3.35×10 <sup>2</sup>      | 1.87×10 <sup>2</sup>      | 1.42×10 <sup>2</sup>      | 5.29×10 <sup>1</sup>      | 7.69×10 <sup>2</sup>      |                           |                           |
|        |        |                 | Potato                    | Total                     | 6.80±0.45×10 <sup>3</sup> | 1.08±0.13×10 <sup>4</sup> | 2.13±0.30×10 <sup>3</sup> | 1.00±0.09×10 <sup>5</sup> | 5.97±0.85×10 <sup>3</sup> | 2.                        |                           |                           |                           |

Table S4. Continued (2/7).

|      |        |                           |                           | 1                         | 2                         | 3                         | 4                         |                           |                           |                           |                           |
|------|--------|---------------------------|---------------------------|---------------------------|---------------------------|---------------------------|---------------------------|---------------------------|---------------------------|---------------------------|---------------------------|
| Year | Season | Medium                    |                           | liquid                    | sediment                  | liquid                    | sediment                  | liquid                    | sediment                  |                           |                           |
| 2017 | Summer | RO                        | Total                     | 6.30±0.50×10 <sup>3</sup> | 8.67±0.50×10 <sup>4</sup> | 4.00±0.00×10 <sup>4</sup> | 4.27±0.55×10 <sup>6</sup> | 1.27±0.04×10 <sup>3</sup> | 4.03±0.15×10 <sup>5</sup> | 6.53±0.15×10 <sup>3</sup> | 4.75±0.00×10 <sup>4</sup> |
|      |        |                           | Pigmented                 | 6.30±0.50×10 <sup>3</sup> | 1.80±0.35×10 <sup>4</sup> | 4.10±0.00×10 <sup>4</sup> | 7.00±1.50×10 <sup>2</sup> | 3.00±0.15×10 <sup>2</sup> | 1.20±0.15×10 <sup>5</sup> | 1.87±0.10×10 <sup>3</sup> | 1.35±0.00×10 <sup>4</sup> |
|      |        |                           | AAP                       | 6.67×10 <sup>1</sup>      | 0                         | 0                         | 4.67×10 <sup>4</sup>      | 3.53×10 <sup>1</sup>      | 1.55×10 <sup>4</sup>      | 2.67×10 <sup>2</sup>      | 3.21×10 <sup>3</sup>      |
|      |        | OM                        | Total                     | 3.80±0.95×10 <sup>5</sup> | 1.14±0.09×10 <sup>6</sup> | 1.00±0.05×10 <sup>5</sup> | 5.83±2.05×10 <sup>6</sup> | 1.51±0.12×10 <sup>4</sup> | 9.83±2.30×10 <sup>5</sup> | 7.87±0.10×10 <sup>4</sup> | 1.74±0.45×10 <sup>5</sup> |
|      |        |                           | Pigmented                 | 2.90±0.30×10 <sup>3</sup> | 1.93±0.20×10 <sup>5</sup> | 5.87±1.35×10 <sup>4</sup> | 7.00±3.00×10 <sup>5</sup> | 2.40±1.20×10 <sup>3</sup> | 1.13±0.45×10 <sup>5</sup> | 6.33±2.50×10 <sup>3</sup> | 1.43±0.45×10 <sup>4</sup> |
|      |        |                           | AAP                       | 0                         | 0                         | 1.43×10 <sup>3</sup>      | 5.83×10 <sup>4</sup>      | 1.41×10 <sup>2</sup>      | 3.97×10 <sup>4</sup>      | 4.22×10 <sup>2</sup>      | 8.96×10 <sup>2</sup>      |
|      |        | RO <sub>T</sub>           | Total                     | 9.33±0.00×10 <sup>1</sup> | 1.24±0.21×10 <sup>3</sup> | 3.23±0.10×10 <sup>2</sup> | 2.13±3.05×10 <sup>4</sup> | 2.00±0.00×10 <sup>1</sup> | 6.03±0.39×10 <sup>3</sup> | 5.20±0.25×10 <sup>2</sup> | 6.73±0.05×10 <sup>2</sup> |
|      |        |                           | Pigmented                 | 9.00±0.50×10 <sup>1</sup> | 1.24±0.21×10 <sup>3</sup> | 3.23±0.10×10 <sup>2</sup> | 2.11±0.30×10 <sup>4</sup> | 1.00±0.00×10 <sup>1</sup> | 5.00±3.25×10 <sup>3</sup> | 4.30±0.20×10 <sup>2</sup> | 4.07±0.05×10 <sup>2</sup> |
|      |        |                           | AAP                       | 1.50×10 <sup>1</sup>      | 3.54×10 <sup>2</sup>      | 0                         | 1.40×10 <sup>4</sup>      | 0                         | 1.43×10 <sup>3</sup>      | 0                         | 2.71×10 <sup>2</sup>      |
|      |        | Potato                    | Total                     | 2.40±0.71×10 <sup>3</sup> | 2.34±0.24×10 <sup>4</sup> | 1.53±0.12×10 <sup>4</sup> | 1.36±0.17×10 <sup>6</sup> | 3.53±0.05×10 <sup>3</sup> | 3.43±0.05×10 <sup>5</sup> | 9.23±2.00×10 <sup>3</sup> | 4.03±0.50×10 <sup>4</sup> |
|      |        |                           | Pigmented                 | 3.43±1.40×10 <sup>2</sup> | 3.17±0.20×10 <sup>3</sup> | 5.57±2.10×10 <sup>3</sup> | 2.03±0.60×10 <sup>5</sup> | 1.43±0.20×10 <sup>3</sup> | 8.67±1.00×10 <sup>4</sup> | 5.37±3.20×10 <sup>3</sup> | 1.57±0.10×10 <sup>4</sup> |
|      |        |                           | AAP                       | 0                         | 0                         | 0                         | 1.20×10 <sup>4</sup>      | 6.83×10 <sup>1</sup>      | 8.39×10 <sup>3</sup>      | 2.98×10 <sup>2</sup>      | 0                         |
|      |        | BG-11                     | Total                     | 5.80±1.00×10 <sup>5</sup> | 2.71±0.38×10 <sup>5</sup> | 1.14±0.31×10 <sup>5</sup> | 6.53±0.75×10 <sup>6</sup> | 2.15±0.03×10 <sup>4</sup> | 1.51±0.15×10 <sup>6</sup> | 1.01±0.02×10 <sup>5</sup> | 1.70±0.11×10 <sup>5</sup> |
|      |        |                           | AOP                       | 0                         | 0                         | 4.60±2.10×10 <sup>4</sup> | 1.10±0.15×10 <sup>5</sup> | 3.33±5.00×10 <sup>1</sup> | 0                         | 1.47±0.45×10 <sup>2</sup> | 1.00±0.15×10 <sup>3</sup> |
|      |        | PNSm                      | Total                     | 2.50±0.20×10 <sup>2</sup> | 1.74±0.18×10 <sup>3</sup> | 1.36±0.10×10 <sup>3</sup> | 9.00±0.50×10 <sup>4</sup> | 7.00±0.00×10 <sup>1</sup> | 1.65±0.53×10 <sup>3</sup> | 1.08±0.30×10 <sup>3</sup> | 4.13±0.20×10 <sup>3</sup> |
|      |        |                           | AnAnP                     | 0                         | 0                         | 0                         | 0                         | 0                         | 0                         | 0                         | 1.33±2.00×10 <sup>1</sup> |
|      | Fall   | RO                        | Total                     | 1.81±0.12×10 <sup>4</sup> | 5.35±0.50×10 <sup>5</sup> | 1.58±0.10×10 <sup>4</sup> | 9.91±1.53×10 <sup>4</sup> | 2.08±0.01×10 <sup>4</sup> | 3.01±0.12×10 <sup>5</sup> | 8.90±2.45×10 <sup>3</sup> | 1.36±0.27×10 <sup>6</sup> |
|      |        |                           | Pigmented                 | 4.23±0.25×10 <sup>3</sup> | 1.83±0.28×10 <sup>5</sup> | 1.25±0.13×10 <sup>4</sup> | 7.44±1.17×10 <sup>4</sup> | 8.73±0.15×10 <sup>3</sup> | 1.14±0.00×10 <sup>5</sup> | 4.40±0.30×10 <sup>3</sup> | 5.97±1.10×10 <sup>5</sup> |
|      |        |                           | AAP                       | 2.65×10 <sup>2</sup>      | 0                         | 3.38×10 <sup>2</sup>      | 0                         | 3.49×10 <sup>2</sup>      | 1.63×10 <sup>4</sup>      | 2.10×10 <sup>2</sup>      | 2.44×10 <sup>4</sup>      |
|      |        | OM                        | Total                     | 1.38±0.13×10 <sup>5</sup> | 6.75±0.15×10 <sup>5</sup> | 1.83±0.19×10 <sup>4</sup> | 2.80±0.00×10 <sup>5</sup> | 2.80±0.11×10 <sup>4</sup> | 1.06±0.11×10 <sup>6</sup> | 1.17±0.14×10 <sup>4</sup> | 6.13±0.15×10 <sup>6</sup> |
|      |        |                           | Pigmented                 | 2.47±0.70×10 <sup>4</sup> | 1.12±0.35×10 <sup>5</sup> | 8.53±0.55×10 <sup>3</sup> | 7.33±0.00×10 <sup>4</sup> | 8.47±1.80×10 <sup>3</sup> | 4.21±0.50×10 <sup>5</sup> | 2.87±0.20×10 <sup>3</sup> | 1.93±0.15×10 <sup>6</sup> |
|      |        |                           | AAP                       | 7.47×10 <sup>2</sup>      | 3.60×10 <sup>3</sup>      | 0                         | 2.53×10 <sup>3</sup>      | 0                         | 3.83×10 <sup>4</sup>      | 1.79×10 <sup>2</sup>      | 0                         |
|      |        | RO <sub>T</sub>           | Total                     | 8.33±1.00×10 <sup>1</sup> | 5.80±0.33×10 <sup>3</sup> | 3.67±0.50×10 <sup>1</sup> | 1.76±0.10×10 <sup>3</sup> | 9.00±5.00×10 <sup>1</sup> | 8.14±0.79×10 <sup>2</sup> | 8.00±2.00×10 <sup>1</sup> | 6.53±0.90×10 <sup>3</sup> |
|      |        |                           | Pigmented                 | 8.33±1.00×10 <sup>1</sup> | 5.48±0.45×10 <sup>3</sup> | 3.67±0.50×10 <sup>1</sup> | 1.62±0.03×10 <sup>3</sup> | 9.00±5.00×10 <sup>1</sup> | 7.14±0.14×10 <sup>2</sup> | 7.67±1.50×10 <sup>1</sup> | 5.27±0.95×10 <sup>3</sup> |
|      |        |                           | AAP                       | 1.19×10 <sup>2</sup>      | 4.98×10 <sup>2</sup>      | 9.17×10 <sup>0</sup>      | 5.41×10 <sup>2</sup>      | 1.13×10 <sup>1</sup>      | 2.60×10 <sup>2</sup>      | 7.69×10 <sup>1</sup>      | 2.15×10 <sup>3</sup>      |
|      |        | Potato                    | Total                     | 1.42±0.00×10 <sup>4</sup> | 3.17±0.23×10 <sup>5</sup> | 8.80±0.60×10 <sup>3</sup> | 9.27±0.10×10 <sup>4</sup> | 9.93±1.05×10 <sup>3</sup> | 3.08±0.00×10 <sup>4</sup> | 1.48±0.05×10 <sup>3</sup> | 8.93±0.80×10 <sup>5</sup> |
|      |        |                           | Pigmented                 | 4.25±0.00×10 <sup>3</sup> | 1.33±0.20×10 <sup>5</sup> | 6.10±0.00×10 <sup>3</sup> | 7.67±0.13×10 <sup>4</sup> | 5.33±0.90×10 <sup>3</sup> | 1.49±0.00×10 <sup>4</sup> | 8.50±0.15×10 <sup>2</sup> | 4.00±0.75×10 <sup>5</sup> |
|      |        |                           | AAP                       | 1.33×10 <sup>2</sup>      | 0                         | 0                         | 0                         | 2.05×10 <sup>2</sup>      | 5.50×10 <sup>2</sup>      | 4.25×10 <sup>1</sup>      | 5.22×10 <sup>4</sup>      |
|      |        | BG-11                     | Total                     | 2.02±0.17×10 <sup>4</sup> | 6.75±0.15×10 <sup>5</sup> | 1.80±0.37×10 <sup>5</sup> | 1.49±0.05×10 <sup>5</sup> | 1.33±0.11×10 <sup>5</sup> | 7.76±0.86×10 <sup>5</sup> | 8.10±0.30×10 <sup>4</sup> | 1.17±0.00×10 <sup>5</sup> |
|      |        |                           | AOP                       | 0.67±1.00×10 <sup>2</sup> | 6.67±0.25×10 <sup>3</sup> | 1.33±0.40×10 <sup>4</sup> | 1.00±0.17×10 <sup>3</sup> | 2.73±0.60×10 <sup>4</sup> | 3.81±0.71×10 <sup>1</sup> | 5.00±0.25×10 <sup>1</sup> | 1.50±0.65×10 <sup>2</sup> |
|      |        | PNSm                      | Total                     | 8.83±3.85×10 <sup>2</sup> | 1.07±0.21×10 <sup>4</sup> | 1.40±0.10×10 <sup>2</sup> | 1.84±0.10×10 <sup>3</sup> | 4.00±1.00×10 <sup>1</sup> | 6.29±0.00×10 <sup>2</sup> | 7.33±2.50×10 <sup>1</sup> | 6.17±0.30×10 <sup>4</sup> |
|      |        |                           | AnAnP                     | 0                         | 5.00±5.00×10 <sup>1</sup> | 0                         | 0                         | 0                         | 0                         | 0                         | 1.00±0.50×10 <sup>1</sup> |
| 2018 | Spring | RO                        | Total                     | 6.47±3.85×10 <sup>3</sup> | 1.37±0.20×10 <sup>5</sup> | 4.53±0.30×10 <sup>4</sup> | 1.13±0.18×10 <sup>5</sup> | 1.38±0.02×10 <sup>3</sup> | 6.05±0.00×10 <sup>4</sup> | 3.33±1.75×10 <sup>2</sup> | 2.97±1.10×10 <sup>5</sup> |
|      |        |                           | Pigmented                 | 2.67±1.20×10 <sup>4</sup> | 5.00±0.50×10 <sup>4</sup> | 1.30±0.45×10 <sup>5</sup> | 4.87±1.60×10 <sup>4</sup> | 3.87±0.30×10 <sup>3</sup> | 2.07±1.60×10 <sup>4</sup> | 1.50±1.10×10 <sup>3</sup> | 6.23±0.15×10 <sup>4</sup> |
|      |        |                           | AAP                       | 4.64×10 <sup>3</sup>      | 4.63×10 <sup>3</sup>      | 2.60×10 <sup>4</sup>      | 2.05×10 <sup>4</sup>      | 1.10×10 <sup>3</sup>      | 2.02×10 <sup>3</sup>      | 8.33×10 <sup>1</sup>      | 1.47×10 <sup>4</sup>      |
|      |        | OM                        | Total                     | 1.11±0.56×10 <sup>4</sup> | 2.00±0.90×10 <sup>5</sup> | 6.87±1.40×10 <sup>4</sup> | 1.60±0.01×10 <sup>5</sup> | 3.00±0.00×10 <sup>4</sup> | 1.35±0.08×10 <sup>5</sup> | 2.59±0.72×10 <sup>3</sup> | 3.70±0.20×10 <sup>5</sup> |
|      |        |                           | Pigmented                 | 3.83±2.65×10 <sup>4</sup> | 4.67±1.50×10 <sup>4</sup> | 7.00±1.00×10 <sup>4</sup> | 4.93±0.25×10 <sup>4</sup> | 3.00±0.00×10 <sup>4</sup> | 1.83±0.25×10 <sup>4</sup> | 4.00±0.70×10 <sup>3</sup> | 5.03±0.20×10 <sup>4</sup> |
|      |        |                           | AAP                       | 0                         | 1.67×10 <sup>3</sup>      | 5.71×10 <sup>3</sup>      | 0                         | 2.73×10 <sup>3</sup>      | 3.67×10 <sup>3</sup>      | 4.44×10 <sup>2</sup>      | 8.39×10 <sup>3</sup>      |
|      |        | RO <sub>T</sub>           | Total                     | 8.00±2.00×10 <sup>1</sup> | 4.43±0.35×10 <sup>2</sup> | 6.63±3.80×10 <sup>2</sup> | 1.46±0.95×10 <sup>3</sup> | 5.33±3.50×10 <sup>1</sup> | 1.20±0.45×10 <sup>2</sup> | 3.00±1.50×10 <sup>1</sup> | 3.00±0.58×10 <sup>3</sup> |
|      |        |                           | Pigmented                 | 8.00±2.00×10 <sup>1</sup> | 2.23±0.00×10 <sup>2</sup> | 5.77±3.60×10 <sup>2</sup> | 1.22±0.75×10 <sup>3</sup> | 2.67±0.50×10 <sup>1</sup> | 9.67±2.50×10 <sup>1</sup> | 3.00±1.50×10 <sup>1</sup> | 3.00±0.58×10 <sup>3</sup> |
|      |        |                           | AAP                       | 0                         | 1.49×10 <sup>2</sup>      | 2.88×10 <sup>2</sup>      | 8.59×10 <sup>2</sup>      | 7.06×10 <sup>0</sup>      | 9.67×10 <sup>1</sup>      | 0                         | 2.18×10 <sup>3</sup>      |
|      |        | Potato                    | Total                     | 5.53±0.75×10 <sup>2</sup> | 8.33±1.30×10 <sup>2</sup> | 5.17±0.25×10 <sup>2</sup> | 7.30±7.60×10 <sup>3</sup> | 1.74±0.22×10 <sup>3</sup> | 1.10±0.00×10 <sup>4</sup> | 2.25±1.04×10 <sup>3</sup> | 3.60±1.15×10 <sup>3</sup> |
|      |        |                           | Pigmented                 | 4.33±1.10×10 <sup>2</sup> | 4.60±0.45×10 <sup>2</sup> | 2.37±0.50×10 <sup>2</sup> | 4.43±4.65×10 <sup>3</sup> | 5.37±1.10×10 <sup>2</sup> | 2.50±0.00×10 <sup>3</sup> | 4.90±2.95×10 <sup>2</sup> | 1.17±0.04×10 <sup>3</sup> |
|      |        |                           | AAP                       | 8.46×10 <sup>1</sup>      | 6.97×10 <sup>1</sup>      | 1.23×10 <sup>2</sup>      | 2.55×10 <sup>3</sup>      | 3.22×10 <sup>2</sup>      | 1.07×10 <sup>3</sup>      | 8.91×10 <sup>1</sup>      | 3.55×10 <sup>2</sup>      |
|      |        | BG-11                     | Total                     | 4.33±0.60×10 <sup>4</sup> | 8.70±0.10×10 <sup>4</sup> | 9.83±4.00×10 <sup>5</sup> | 1.29±1.12×10 <sup>5</sup> | 3.43±0.30×10 <sup>5</sup> | 5.15±0.00×10 <sup>5</sup> | 7.75±0.00×10 <sup>4</sup> | 1.95±0.06×10 <sup>5</sup> |
|      |        |                           | AOP                       | 1.13±0.35×10 <sup>2</sup> | 3.97±0.45×10 <sup>2</sup> | 1.63±0.05×10 <sup>3</sup> | 1.83±0.25×10 <sup>3</sup> | 1.40±0.25×10 <sup>2</sup> | 2.05±0.00×10 <sup>3</sup> | 1.90±1.50×10 <sup>2</sup> | 1.80±0.30×10 <sup>3</sup> |
|      |        | PNSm                      | Total                     | 1.13±0.20×10 <sup>2</sup> | 8.33±4.50×10 <sup>1</sup> | 2.43±0.40×10 <sup>2</sup> | 1.40±0.16×10 <sup>3</sup> | 1.90±0.55×10 <sup>2</sup> | 1.33±0.02×10 <sup>3</sup> | 1.33±0.00×10 <sup>1</sup> | 1.90±0.20×10 <sup>2</sup> |
|      |        |                           | AnAnP                     | 0                         | 0                         | 0                         | 0                         | 0                         | 0                         | 0                         | 0                         |
|      | Summer | RO                        | Total                     | 1.15±0.07×10 <sup>4</sup> | 1.36±0.24×10 <sup>4</sup> | 1.13±0.19×10 <sup>4</sup> | 5.53±1.00×10 <sup>4</sup> | 2.63±0.35×10 <sup>4</sup> | 9.33±1.25×10 <sup>5</sup> | 1.36±0.11×10 <sup>4</sup> | 3.93±0.10×10 <sup>4</sup> |
|      |        |                           | Pigmented                 | 8.33±3.50×10 <sup>2</sup> | 3.75±1.35×10 <sup>3</sup> | 2.33±0.35×10 <sup>3</sup> | 2.17±0.55×10 <sup>4</sup> | 1.17±0.25×10 <sup>4</sup> | 4.10±0.65×10 <sup>5</sup> | 4.93±0.35×10 <sup>3</sup> | 1.77±0.05×10 <sup>4</sup> |
|      |        |                           | AAP                       | 0                         | 0                         | 1.40×10 <sup>3</sup>      | 3.61×10 <sup>3</sup>      | 1.89×10 <sup>3</sup>      | 8.33×10 <sup>4</sup>      | 1.50×10 <sup>3</sup>      | 0                         |
|      |        | OM                        | Total                     | 1.45±0.00×10 <sup>4</sup> | 9.10±1.30×10 <sup>4</sup> | 3.34±0.15×10 <sup>4</sup> | 1.10±0.05×10 <sup>5</sup> | 4.73±0.75×10 <sup>4</sup> | 2.45±0.06×10 <sup>6</sup> | 2.36±0.12×10 <sup>4</sup> | 1.10±0.02×10 <sup>5</sup> |
|      |        |                           | Pigmented                 | 1.30±0.00×10 <sup>3</sup> | 3.10±0.30×10 <sup>4</sup> | 6.43±0.20×10 <sup>3</sup> | 3.43±0.55×10 <sup>4</sup> | 1.33±0.35×10 <sup>4</sup> | 9.77±0.60×10 <sup>5</sup> | 7.27±0.20×10 <sup>3</sup> | 2.63±0.65×10 <sup>4</sup> |
|      |        |                           | AAP                       | 0                         | 5.64×10 <sup>3</sup>      | 1.77×10 <sup>3</sup>      | 0                         | 3.46×10 <sup>3</sup>      | 1.87×10 <sup>5</sup>      | 3.85×10 <sup>3</sup>      | 0                         |
|      |        | RO <sub>T</sub>           | Total                     | 9.67±8.50×10 <sup>1</sup> | 3.53±0.85×10 <sup>2</sup> | 3.03±1.40×10 <sup>2</sup> | 9.67±6.50×10 <sup>1</sup> | 1.50±0.50×10 <sup>2</sup> | 2.07±1.00×10 <sup>3</sup> | 4.17±0.45×10 <sup>2</sup> | 9.50±6.10×10 <sup>2</sup> |
|      |        |                           | Pigmented                 | 9.67±8.50×10 <sup>1</sup> | 2.87±0.65×10 <sup>2</sup> | 2.13±1.90×10 <sup>2</sup> | 5.00±2.50×10 <sup>1</sup> | 1.50±0.50×10 <sup>2</sup> | 2.00±0.90×10 <sup>3</sup> | 3.83±0.25×10 <sup>2</sup> | 7.63±5.20×10 <sup>2</sup> |
|      |        |                           | AAP                       | 0                         | 0                         | 1.90×10 <sup>2</sup>      | 0                         | 2.31×10 <sup>1</sup>      | 5.38×10 <sup>2</sup>      | 1.92×10 <sup>2</sup>      | 0                         |
|      |        | Potato                    | Total                     | 7.33±0.70×10 <sup>3</sup> | 1.28±0.10×10 <sup>3</sup> | 8.30±1.75×10 <sup>3</sup> | 1.73±0.08×10 <sup>4</sup> | 8.17±1.45×10 <sup>3</sup> | 4.50±1.15×10 <sup>5</sup> | 6.10±1.30×10 <sup>3</sup> | 8.67±1.40×10 <sup>3</sup> |
|      |        |                           | Pigmented                 | 7.00±2.00×10 <sup>2</sup> | 3.20±0.50×10 <sup>2</sup> | 2.83±0.85×10 <sup>3</sup> | 7.07±0.25×10 <sup>3</sup> | 3.77±0.25×10 <sup>3</sup> | 3.43±0.35×10 <sup>5</sup> | 3.50±0.90×10 <sup>3</sup> | 4.47±1.30×10 <sup>3</sup> |
|      |        |                           | AAP                       | 0                         | 0                         | 5.15×10 <sup>2</sup>      | 0                         | 9.83×10 <sup>2</sup>      | 4.64×10 <sup>4</sup>      | 7.50×10 <sup>2</sup>      | 0                         |
|      |        | BG-11                     | Total                     | 1.23±0.07×10 <sup>4</sup> | 1.89±0.25×10 <sup>4</sup> | 1.33±0.50×10 <sup>4</sup> | 1.00±0.00×10 <sup>4</sup> | 1.17±0.40×10 <sup>5</sup> | 1.00±0.50×10 <sup>7</sup> | 8.67±0.00×10 <sup>3</sup> | 1.00±1.00×10 <sup>7</sup> |
| AOP  | 0      | 0                         | 1.57±0.20×10 <sup>3</sup> | 1.27±0.05×10 <sup>3</sup> | 5.07±0.85×10 <sup>2</sup> | 1.43±0.20×10 <sup>4</sup> | 2.35±0.00×10 <sup>2</sup> | 1.27±1.50×10 <sup>3</sup> |                           |                           |                           |
| PNSm | Total  | 7.10±0.20×10 <sup>3</sup> | 1.57±0.09×10 <sup>3</sup> | 2.54±0.27×10 <sup>3</sup> | 1.22±1.70×10 <sup>3</sup> | 2.40±0.16×10 <sup>3</sup> | 3.93±0.60×10 <sup>4</sup> | 9.10±0.15×10 <sup>2</sup> | 1.06±1.20×10 <sup>3</sup> |                           |                           |
|      | AnAnP  | 0                         | 0                         | 1.80±0.50×10 <sup>2</sup> | 0                         | 0                         | 0                         | 0                         | 0                         |                           |                           |



Table S4. Continued (3/7).

|                 |        |                 |                           | 1                         |                           | 2                         |                           | 3                         |                           | 4                         |                           |
|-----------------|--------|-----------------|---------------------------|---------------------------|---------------------------|---------------------------|---------------------------|---------------------------|---------------------------|---------------------------|---------------------------|
| Year            | Season | Medium          |                           | liquid                    | sediment                  | liquid                    | sediment                  | liquid                    | sediment                  | liquid                    | sediment                  |
| 2018            | Fall   | RO              | Total                     | 1.86±0.98×10 <sup>4</sup> | 1.92±0.04×10 <sup>4</sup> | 6.27±0.15×10 <sup>4</sup> | 3.60±0.55×10 <sup>4</sup> | 1.25±0.01×10 <sup>4</sup> | 5.70±0.20×10 <sup>3</sup> | 1.89±0.23×10 <sup>4</sup> | 1.38±0.26×10 <sup>4</sup> |
|                 |        |                 | Pigmented                 | 1.63±0.50×10 <sup>3</sup> | 3.60±0.05×10 <sup>3</sup> | 1.43±0.00×10 <sup>4</sup> | 1.70±0.50×10 <sup>4</sup> | 4.70±0.15×10 <sup>3</sup> | 2.60±0.20×10 <sup>3</sup> | 7.63±0.05×10 <sup>3</sup> | 6.27±0.95×10 <sup>3</sup> |
|                 |        |                 | AAP                       | 6.53×10 <sup>1</sup>      | 3.72×10 <sup>2</sup>      | 2.61×10 <sup>3</sup>      | 4.47×10 <sup>2</sup>      | 2.61×10 <sup>2</sup>      | 2.74×10 <sup>2</sup>      | 3.55×10 <sup>2</sup>      | 4.18×10 <sup>2</sup>      |
|                 |        | OM              | Total                     | 3.87±0.15×10 <sup>4</sup> | 7.47±0.10×10 <sup>4</sup> | 1.17±0.04×10 <sup>4</sup> | 7.90±0.10×10 <sup>4</sup> | 4.57±0.65×10 <sup>4</sup> | 1.41±0.01×10 <sup>4</sup> | 3.00±0.13×10 <sup>4</sup> | 3.87±0.15×10 <sup>4</sup> |
|                 |        |                 | Pigmented                 | 3.67±0.00×10 <sup>3</sup> | 1.13±0.50×10 <sup>4</sup> | 4.83±0.60×10 <sup>3</sup> | 2.17±0.10×10 <sup>4</sup> | 1.47±0.35×10 <sup>4</sup> | 3.30±0.25×10 <sup>3</sup> | 8.37±0.35×10 <sup>3</sup> | 1.10±0.10×10 <sup>4</sup> |
|                 |        |                 | AAP                       | 0                         | 0                         | 0                         | 1.11×10 <sup>3</sup>      | 1.83×10 <sup>3</sup>      | 0                         | 1.01×10 <sup>3</sup>      | 7.86×10 <sup>2</sup>      |
|                 |        | RO <sub>T</sub> | Total                     | 8.67±0.50×10 <sup>1</sup> | 5.70±0.65×10 <sup>2</sup> | 5.80±0.90×10 <sup>2</sup> | 1.66±0.12×10 <sup>3</sup> | 4.47±0.55×10 <sup>2</sup> | 1.13±0.05×10 <sup>2</sup> | 9.67±1.50×10 <sup>1</sup> | 7.77±0.70×10 <sup>2</sup> |
|                 |        |                 | Pigmented                 | 8.67±0.50×10 <sup>1</sup> | 5.60±0.60×10 <sup>2</sup> | 5.80±0.90×10 <sup>2</sup> | 1.66±0.12×10 <sup>3</sup> | 4.47±0.55×10 <sup>2</sup> | 1.13±0.05×10 <sup>2</sup> | 8.67±0.00×10 <sup>1</sup> | 7.77±0.70×10 <sup>2</sup> |
|                 |        |                 | AAP                       | 1.73×10 <sup>1</sup>      | 0                         | 2.42×10 <sup>2</sup>      | 5.19×10 <sup>2</sup>      | 5.58×10 <sup>1</sup>      | 0                         | 6.67×10 <sup>0</sup>      | 2.59×10 <sup>2</sup>      |
|                 |        | Potato          | Total                     | 4.77±0.15×10 <sup>3</sup> | 9.70±0.25×10 <sup>2</sup> | 1.12±0.06×10 <sup>3</sup> | 4.63±0.05×10 <sup>3</sup> | 9.37±2.05×10 <sup>3</sup> | 2.73±0.35×10 <sup>3</sup> | 9.63±0.70×10 <sup>3</sup> | 9.70±0.40×10 <sup>3</sup> |
|                 |        |                 | Pigmented                 | 2.43±0.40×10 <sup>3</sup> | 2.10±0.25×10 <sup>2</sup> | 4.57±0.50×10 <sup>2</sup> | 2.13±0.30×10 <sup>3</sup> | 4.23±0.60×10 <sup>3</sup> | 1.33±0.50×10 <sup>3</sup> | 5.93±0.70×10 <sup>3</sup> | 6.30±0.05×10 <sup>3</sup> |
|                 |        |                 | AAP                       | 1.43×10 <sup>2</sup>      | 0                         | 8.30×10 <sup>1</sup>      | 1.94×10 <sup>2</sup>      | 0                         | 0                         | 0                         | 0                         |
|                 |        | BG-11           | Total                     | 2.39±0.18×10 <sup>4</sup> | 5.57±1.95×10 <sup>4</sup> | 1.70±0.11×10 <sup>4</sup> | 3.30±0.61×10 <sup>4</sup> | 2.10±0.50×10 <sup>4</sup> | 4.03±0.45×10 <sup>5</sup> | 6.60±2.70×10 <sup>3</sup> | 2.26±0.35×10 <sup>6</sup> |
|                 |        |                 | AOP                       | 3.30±0.00×10 <sup>0</sup> | 2.67±2.60×10 <sup>2</sup> | 8.33±2.00×10 <sup>1</sup> | 2.13±0.45×10 <sup>2</sup> | 2.35±0.00×10 <sup>2</sup> | 6.57±4.70×10 <sup>3</sup> | 1.23±0.35×10 <sup>2</sup> | 2.57±0.85×10 <sup>4</sup> |
|                 |        |                 | Total                     | 8.00±0.00×10 <sup>1</sup> | 1.27±0.20×10 <sup>2</sup> | 1.10±0.05×10 <sup>2</sup> | 9.00±0.50×10 <sup>1</sup> | 1.53±0.05×10 <sup>2</sup> | 2.40±0.30×10 <sup>2</sup> | 7.33±0.50×10 <sup>1</sup> | 7.40±0.10×10 <sup>2</sup> |
|                 |        | PNSm            | Total                     | 6.67±0.00×10 <sup>0</sup> | 3.33±1.00×10 <sup>1</sup> | 0                         | 0                         | 0                         | 0                         | 0                         | 0                         |
|                 |        |                 | AnAnP                     | 6.67±0.00×10 <sup>0</sup> | 3.33±1.00×10 <sup>1</sup> | 0                         | 0                         | 0                         | 0                         | 0                         | 0                         |
|                 |        |                 |                           |                           |                           |                           |                           |                           |                           |                           |                           |
| 2019            | Spring | RO              | Total                     | 2.01±0.52×10 <sup>3</sup> | 1.23±0.26×10 <sup>4</sup> | 3.13±0.20×10 <sup>3</sup> | 5.05±0.00×10 <sup>4</sup> | 1.13±0.03×10 <sup>4</sup> | 8.53±0.15×10 <sup>3</sup> | 1.36±0.15×10 <sup>4</sup> | 4.40±0.45×10 <sup>5</sup> |
|                 |        |                 | Pigmented                 | 3.80±1.20×10 <sup>2</sup> | 5.07±3.45×10 <sup>3</sup> | 1.33±0.15×10 <sup>3</sup> | 6.75±0.00×10 <sup>3</sup> | 4.13±0.10×10 <sup>3</sup> | 4.30±0.95×10 <sup>3</sup> | 4.37±0.05×10 <sup>3</sup> | 2.83±0.00×10 <sup>5</sup> |
|                 |        |                 | AAP                       | 1.22×10 <sup>2</sup>      | 1.97×10 <sup>3</sup>      | 3.01×10 <sup>2</sup>      | 3.21×10 <sup>3</sup>      | 1.22×10 <sup>3</sup>      | 2.04×10 <sup>3</sup>      | 1.28×10 <sup>3</sup>      | 1.77×10 <sup>3</sup>      |
|                 |        | OM              | Total                     | 1.87±0.43×10 <sup>4</sup> | 4.53±0.90×10 <sup>4</sup> | 4.03±0.45×10 <sup>4</sup> | 4.77±0.95×10 <sup>5</sup> | 8.90±2.65×10 <sup>3</sup> | 3.41±0.16×10 <sup>5</sup> | 4.97±0.00×10 <sup>4</sup> | 7.27±1.15×10 <sup>5</sup> |
|                 |        |                 | Pigmented                 | 2.93±0.80×10 <sup>3</sup> | 5.33±0.50×10 <sup>3</sup> | 4.67±1.00×10 <sup>3</sup> | 6.67±1.50×10 <sup>4</sup> | 3.03±0.60×10 <sup>3</sup> | 5.03±0.15×10 <sup>4</sup> | 5.67±0.50×10 <sup>3</sup> | 1.90±0.20×10 <sup>5</sup> |
|                 |        |                 | AAP                       | 6.67×10 <sup>2</sup>      | 1.11×10 <sup>3</sup>      | 2.03×10 <sup>3</sup>      | 2.42×10 <sup>4</sup>      | 5.59×10 <sup>2</sup>      | 1.53×10 <sup>4</sup>      | 1.47×10 <sup>3</sup>      | 9.07×10 <sup>4</sup>      |
|                 |        | RO <sub>T</sub> | Total                     | 3.97±1.85×10 <sup>2</sup> | 5.00±1.80×10 <sup>2</sup> | 6.67±0.70×10 <sup>2</sup> | 3.05±0.03×10 <sup>3</sup> | 2.25±0.00×10 <sup>2</sup> | 3.23±0.67×10 <sup>3</sup> | 1.43±0.07×10 <sup>2</sup> | 2.03±0.26×10 <sup>3</sup> |
|                 |        |                 | Pigmented                 | 3.63±1.55×10 <sup>2</sup> | 5.00±1.80×10 <sup>2</sup> | 5.23±0.45×10 <sup>2</sup> | 2.94±0.19×10 <sup>3</sup> | 1.15±0.00×10 <sup>2</sup> | 1.91±0.88×10 <sup>3</sup> | 1.27±0.45×10 <sup>2</sup> | 1.02±0.77×10 <sup>3</sup> |
|                 |        |                 | AAP                       | 3.63×10 <sup>2</sup>      | 3.00×10 <sup>2</sup>      | 3.49×10 <sup>2</sup>      | 1.07×10 <sup>3</sup>      | 2.30×10 <sup>1</sup>      | 4.78×10 <sup>2</sup>      | 0                         | 6.14×10 <sup>2</sup>      |
|                 |        | Potato          | Total                     | 3.52±0.07×10 <sup>3</sup> | 2.22±0.01×10 <sup>3</sup> | 9.10±0.00×10 <sup>3</sup> | 7.43±0.85×10 <sup>4</sup> | 8.27±1.60×10 <sup>3</sup> | 2.37±0.01×10 <sup>4</sup> | 3.53±0.50×10 <sup>3</sup> | 4.50±0.45×10 <sup>4</sup> |
|                 |        |                 | Pigmented                 | 5.67±1.10×10 <sup>2</sup> | 4.50±0.05×10 <sup>2</sup> | 3.35±0.00×10 <sup>3</sup> | 2.70±0.35×10 <sup>4</sup> | 3.80±1.05×10 <sup>3</sup> | 1.30±0.02×10 <sup>4</sup> | 2.53±0.15×10 <sup>3</sup> | 2.77±0.00×10 <sup>4</sup> |
|                 |        |                 | AAP                       | 2.48×10 <sup>2</sup>      | 1.31×10 <sup>2</sup>      | 1.73×10 <sup>3</sup>      | 1.35×10 <sup>4</sup>      | 2.03×10 <sup>3</sup>      | 1.13×10 <sup>4</sup>      | 1.86×10 <sup>3</sup>      | 2.40×10 <sup>4</sup>      |
|                 |        | R2A             | Total                     | N/A                       | 3.25±0.61×10 <sup>4</sup> | 5.53±0.60×10 <sup>4</sup> | 6.30±3.00×10 <sup>4</sup> | 5.90±0.05×10 <sup>4</sup> | 5.13±0.05×10 <sup>5</sup> | 2.09±0.22×10 <sup>4</sup> | 2.22±0.19×10 <sup>5</sup> |
|                 |        |                 | Pigmented                 | N/A                       | 7.47±1.65×10 <sup>3</sup> | 9.67±0.45×10 <sup>3</sup> | 2.80±1.80×10 <sup>4</sup> | 1.70±0.35×10 <sup>4</sup> | 2.00±0.45×10 <sup>5</sup> | 7.60±1.05×10 <sup>3</sup> | 8.17±1.15×10 <sup>4</sup> |
|                 |        |                 | AAP                       | N/A                       | 1.74×10 <sup>3</sup>      | 2.94×10 <sup>3</sup>      | 1.01×10 <sup>4</sup>      | 1.79×10 <sup>3</sup>      | 1.36×10 <sup>5</sup>      | 5.43×10 <sup>3</sup>      | 4.67×10 <sup>4</sup>      |
|                 |        | BG-11           | Total                     | 2.14±0.74×10 <sup>4</sup> | 4.45±1.25×10 <sup>4</sup> | 1.07±0.02×10 <sup>5</sup> | 2.30±0.06×10 <sup>5</sup> | 4.57±0.00×10 <sup>4</sup> | 1.00±0.10×10 <sup>6</sup> | 5.33±0.65×10 <sup>4</sup> | 4.57±0.20×10 <sup>5</sup> |
|                 |        |                 | AOP                       | 1.30±0.05×10 <sup>2</sup> | 5.33±0.50×10 <sup>1</sup> | 0                         | 3.50±0.30×10 <sup>4</sup> | 0                         | 4.43±2.05×10 <sup>4</sup> | 2.33±0.00×10 <sup>1</sup> | 4.87±0.40×10 <sup>2</sup> |
|                 |        |                 | Total                     | 5.77±2.35×10 <sup>2</sup> | 2.67±0.00×10 <sup>1</sup> | 3.83±0.10×10 <sup>2</sup> | 1.32±0.04×10 <sup>4</sup> | 1.05±0.05×10 <sup>3</sup> | 3.43±0.10×10 <sup>3</sup> | 5.67±1.50×10 <sup>1</sup> | 5.00±5.10×10 <sup>2</sup> |
|                 |        | PNSm            | Total                     | 4.33±2.50×10 <sup>1</sup> | 0                         | 0                         | 0                         | 1.33±2.00×10 <sup>1</sup> | 3.33±5.00×10 <sup>1</sup> | 0                         | 1.00±1.50×10 <sup>1</sup> |
|                 |        |                 | AnAnP                     | 4.33±2.50×10 <sup>1</sup> | 0                         | 0                         | 0                         | 1.33±2.00×10 <sup>1</sup> | 3.33±5.00×10 <sup>1</sup> | 0                         | 1.00±1.50×10 <sup>1</sup> |
|                 |        |                 |                           |                           |                           |                           |                           |                           |                           |                           |                           |
|                 | Summer | RO              | Total                     | 5.63±1.50×10 <sup>3</sup> | 5.77±0.75×10 <sup>4</sup> | 7.50±3.10×10 <sup>4</sup> | 4.40±0.75×10 <sup>6</sup> | 6.80±0.30×10 <sup>4</sup> | 1.05±0.07×10 <sup>5</sup> | 9.63±0.50×10 <sup>3</sup> | 2.48±0.26×10 <sup>5</sup> |
|                 |        |                 | Pigmented                 | 3.07±0.60×10 <sup>3</sup> | 0                         | 2.40±0.25×10 <sup>4</sup> | 2.03±0.30×10 <sup>5</sup> | 2.93±0.25×10 <sup>4</sup> | 5.07±0.30×10 <sup>4</sup> | 3.33±0.40×10 <sup>3</sup> | 8.20±0.95×10 <sup>4</sup> |
|                 |        |                 | AAP                       | 6.13×10 <sup>2</sup>      | 0                         | 5.19×10 <sup>3</sup>      | 4.15×10 <sup>4</sup>      | 6.29×10 <sup>3</sup>      | 1.27×10 <sup>4</sup>      | 4.76×10 <sup>2</sup>      | 2.39×10 <sup>4</sup>      |
|                 |        | OM              | Total                     | 4.57±0.20×10 <sup>4</sup> | N/A                       | 1.43±0.16×10 <sup>5</sup> | 6.40±2.90×10 <sup>6</sup> | 5.73±1.65×10 <sup>4</sup> | 3.37±0.15×10 <sup>5</sup> | 3.36±0.11×10 <sup>4</sup> | 1.11±0.13×10 <sup>6</sup> |
|                 |        |                 | Pigmented                 | 5.00±1.00×10 <sup>3</sup> | N/A                       | 2.73±1.20×10 <sup>4</sup> | 1.97±0.45×10 <sup>5</sup> | 2.03±0.30×10 <sup>4</sup> | 1.50±0.45×10 <sup>5</sup> | 2.47±0.35×10 <sup>3</sup> | 1.87±0.20×10 <sup>5</sup> |
|                 |        |                 | AAP                       | 0                         | 0                         | 3.28×10 <sup>3</sup>      | 4.57×10 <sup>4</sup>      | 0                         | 1.10×10 <sup>4</sup>      | 5.23×10 <sup>2</sup>      | 1.78×10 <sup>4</sup>      |
|                 |        | RO <sub>T</sub> | Total                     | 7.17±2.80×10 <sup>2</sup> | 4.17±1.25×10 <sup>3</sup> | 1.70±0.03×10 <sup>3</sup> | 5.07±1.20×10 <sup>4</sup> | 1.22±0.20×10 <sup>3</sup> | 3.92±0.29×10 <sup>3</sup> | 1.77±0.50×10 <sup>2</sup> | 9.83±0.45×10 <sup>3</sup> |
|                 |        |                 | Pigmented                 | 7.13±2.75×10 <sup>2</sup> | 2.87±1.20×10 <sup>3</sup> | 1.51±0.01×10 <sup>3</sup> | 2.57±0.10×10 <sup>3</sup> | 7.20±2.20×10 <sup>2</sup> | 3.42±0.32×10 <sup>3</sup> | 1.77±0.50×10 <sup>2</sup> | 5.93±0.95×10 <sup>3</sup> |
|                 |        |                 | AAP                       | 1.43×10 <sup>2</sup>      | 0                         | 1.08×10 <sup>3</sup>      | 1.14×10 <sup>4</sup>      | 0                         | 2.63×10 <sup>3</sup>      | 1.33×10 <sup>2</sup>      | 4.94×10 <sup>3</sup>      |
|                 |        | Potato          | Total                     | 1.43±0.15×10 <sup>4</sup> | 9.47±0.85×10 <sup>3</sup> | 5.60±0.80×10 <sup>4</sup> | 1.05±0.44×10 <sup>5</sup> | 6.00±3.80×10 <sup>3</sup> | 4.57±0.35×10 <sup>4</sup> | 1.54±0.13×10 <sup>3</sup> | 3.44±0.99×10 <sup>4</sup> |
|                 |        |                 | Pigmented                 | 2.67±0.40×10 <sup>3</sup> | 3.37±0.40×10 <sup>3</sup> | 2.27±0.10×10 <sup>4</sup> | 4.23±1.15×10 <sup>5</sup> | 2.83±0.65×10 <sup>3</sup> | 2.70±0.35×10 <sup>4</sup> | 4.93±0.60×10 <sup>2</sup> | 9.37±3.55×10 <sup>3</sup> |
|                 |        |                 | AAP                       | 2.67×10 <sup>2</sup>      | 0                         | 2.06×10 <sup>3</sup>      | 7.70×10 <sup>4</sup>      | 5.83×10 <sup>2</sup>      | 4.70×10 <sup>3</sup>      | 1.37×10 <sup>2</sup>      | 2.04×10 <sup>3</sup>      |
|                 |        | R2A             | Total                     | 1.56±0.03×10 <sup>4</sup> | 4.70±0.40×10 <sup>4</sup> | 1.31±0.25×10 <sup>5</sup> | 9.93±0.30×10 <sup>5</sup> | 1.23±0.05×10 <sup>5</sup> | 1.00±0.18×10 <sup>5</sup> | 3.35±0.42×10 <sup>4</sup> | 8.30±1.30×10 <sup>5</sup> |
|                 |        |                 | Pigmented                 | 1.80±0.25×10 <sup>3</sup> | 6.00±0.50×10 <sup>2</sup> | 3.50±0.30×10 <sup>4</sup> | 4.53±0.55×10 <sup>5</sup> | 4.77±1.55×10 <sup>4</sup> | 5.30±1.70×10 <sup>4</sup> | 1.02±0.13×10 <sup>4</sup> | 1.02±0.13×10 <sup>4</sup> |
|                 |        |                 | AAP                       | 0                         | 2.86×10 <sup>2</sup>      | 0                         | 9.71×10 <sup>4</sup>      | 2.38×10 <sup>3</sup>      | 4.82×10 <sup>3</sup>      | 1.20×10 <sup>3</sup>      | 2.50×10 <sup>4</sup>      |
|                 |        | BG-11           | Total                     | 1.43±0.07×10 <sup>4</sup> | 3.92±0.26×10 <sup>4</sup> | 5.17±1.00×10 <sup>5</sup> | 6.87±0.40×10 <sup>6</sup> | 1.21±0.07×10 <sup>5</sup> | 5.23±0.10×10 <sup>5</sup> | 8.60±2.85×10 <sup>4</sup> | 4.97±0.95×10 <sup>6</sup> |
|                 |        |                 | AOP                       | 4.44±1.33×10 <sup>3</sup> | 1.37±0.03×10 <sup>3</sup> | 8.57±0.00×10 <sup>3</sup> | 1.33±0.05×10 <sup>4</sup> | 7.20±0.10×10 <sup>2</sup> | 2.33±1.20×10 <sup>2</sup> | 8.47±6.00×10 <sup>2</sup> | 1.70±0.14×10 <sup>4</sup> |
|                 |        |                 | Total                     | 1.33±0.50×10 <sup>1</sup> | 2.67±0.50×10 <sup>1</sup> | 6.83±0.55×10 <sup>2</sup> | 4.23±0.65×10 <sup>2</sup> | 3.33±0.75×10 <sup>1</sup> | 1.99±0.07×10 <sup>3</sup> | 9.47±0.10×10 <sup>3</sup> | 4.64±0.69×10 <sup>3</sup> |
|                 |        | PNSm            | Total                     | 0                         | 0                         | 1.50±0.10×10 <sup>2</sup> | 0                         | 0                         | 0                         | 1.67±0.00×10 <sup>1</sup> | 0                         |
|                 |        |                 | AnAnP                     | 0                         | 0                         | 1.50±0.10×10 <sup>2</sup> | 0                         | 0                         | 0                         | 1.67±0.00×10 <sup>1</sup> | 0                         |
|                 |        |                 |                           |                           |                           |                           |                           |                           |                           |                           |                           |
|                 | Fall   | RO              | Total                     | 1.13±0.08×10 <sup>4</sup> | 5.07±0.40×10 <sup>4</sup> | 4.47±0.05×10 <sup>3</sup> | 8.17±0.15×10 <sup>3</sup> | 1.76±0.84×10 <sup>4</sup> | 6.80±0.55×10 <sup>4</sup> | 9.43±1.95×10 <sup>3</sup> | 5.47±0.15×10 <sup>5</sup> |
|                 |        |                 | Pigmented                 | 2.97±0.60×10 <sup>3</sup> | 2.03±0.30×10 <sup>4</sup> | 2.77±0.55×10 <sup>3</sup> | 2.70±0.05×10 <sup>3</sup> | 3.87±1.70×10 <sup>3</sup> | 3.20±0.60×10 <sup>4</sup> | 3.03±1.60×10 <sup>3</sup> | 2.80±0.00×10 <sup>5</sup> |
|                 |        |                 | AAP                       | 2.97×10 <sup>2</sup>      | 1.36×10 <sup>3</sup>      | 0                         | 5.79×10 <sup>2</sup>      | 8.79×10 <sup>2</sup>      | 1.01×10 <sup>4</sup>      | 4.33×10 <sup>2</sup>      | 6.67×10 <sup>3</sup>      |
| OM              |        | Total           | 1.71±0.04×10 <sup>4</sup> | 2.46±0.19×10 <sup>5</sup> | 6.03±0.15×10 <sup>4</sup> | 6.83±2.10×10 <sup>4</sup> | 1.57±0.19×10 <sup>4</sup> | 1.36±0.09×10 <sup>5</sup> | 4.43±0.25×10 <sup>4</sup> | 4.70±0.15×10 <sup>6</sup> |                           |
|                 |        | Pigmented       | 4.25±1.85×10 <sup>3</sup> | 2.63±0.35×10 <sup>4</sup> | 5.33±0.50×10 <sup>3</sup> | 1.53±0.30×10 <sup>4</sup> | 2.13±0.35×10 <sup>3</sup> | 2.90±0.60×10 <sup>4</sup> | 9.33±2.50×10 <sup>3</sup> | 147±0.05×10 <sup>6</sup>  |                           |
|                 |        | AAP             | 7.08×10 <sup>2</sup>      | 6.58×10 <sup>3</sup>      | 6.27×10 <sup>2</sup>      | 2.19×10 <sup>3</sup>      | 5.33×10 <sup>2</sup>      | 2.90×10 <sup>3</sup>      | 1.65×10 <sup>3</sup>      | 4.73×10 <sup>4</sup>      |                           |
| RO <sub>T</sub> |        | Total           | 1.08±0.02×10 <sup>3</sup> | 8.30±1.45×10 <sup>3</sup> | 1.56±0.10×10 <sup>3</sup> | 6.50±0.65×10 <sup>2</sup> | 6.60±0.25×10 <sup>2</sup> | 9.63±0.00×10 <sup>2</sup> | 7.25±0.00×10 <sup>2</sup> | 2.60±0.40×10 <sup>4</sup> |                           |
|                 |        | Pigmented       | 8.03±2.45×10 <sup>2</sup> | 8.10±1.30×10 <sup>3</sup> | 1.24±0.10×10 <sup>3</sup> | 4.83±0.15×10 <sup>2</sup> | 3.30±0.20×10 <sup>2</sup> | 7.97±1.85×10 <sup>2</sup> | 5.95±0.00×10 <sup>2</sup> | 2.60±0.40×10 <sup>4</sup> |                           |
|                 |        | A               |                           |                           |                           |                           |                           |                           |                           |                           |                           |

**Table S4. Continued (4/7).**

| Year | Season | Medium            |                 | 5                         |                           | 6                         |                           | 7                         |  | 8                         |  | 9                         |  | 10                         |  |
|------|--------|-------------------|-----------------|---------------------------|---------------------------|---------------------------|---------------------------|---------------------------|--|---------------------------|--|---------------------------|--|----------------------------|--|
|      |        |                   |                 | liquid                    | sediment                  | liquid                    |                           | liquid                    |  | liquid                    |  | liquid                    |  | liquid                     |  |
| 2016 | Spring | RO                | Total           | 1.53±0.10×10 <sup>3</sup> | 7.90±0.00×10 <sup>4</sup> | 1.01±0.60×10 <sup>4</sup> |                           | 1.02±0.17×10 <sup>4</sup> |  | 2.18±0.81×10 <sup>4</sup> |  | 7.50±1.20×10 <sup>3</sup> |  | 4.45±0.35×10 <sup>3</sup>  |  |
|      |        |                   | Pigmented       | 3.00±0.20×10 <sup>2</sup> | 1.40±1.40×10 <sup>4</sup> | 4.95±1.35×10 <sup>3</sup> |                           | 4.20±2.00×10 <sup>3</sup> |  | 1.24±0.01×10 <sup>4</sup> |  | 6.65±1.55×10 <sup>3</sup> |  | 3.70±0.00×10 <sup>3</sup>  |  |
|      |        |                   | AAP             | 8.68×10 <sup>1</sup>      | 8.33×10 <sup>3</sup>      | 7.40×10 <sup>2</sup>      |                           | 2.55×10 <sup>2</sup>      |  | 3.92×10 <sup>2</sup>      |  | 1.05×10 <sup>3</sup>      |  | 2.87×10 <sup>2</sup>       |  |
|      |        |                   | OM              | Total                     | 1.86±1.07×10 <sup>4</sup> | 2.77±0.39×10 <sup>5</sup> | 2.38±0.31×10 <sup>4</sup> | 3.35±0.35×10 <sup>4</sup> |  | 8.90±0.20×10 <sup>3</sup> |  | 1.38±0.14×10 <sup>4</sup> |  | 3.909±0.70×10 <sup>3</sup> |  |
|      |        |                   | Pigmented       | 5.35±0.35×10 <sup>2</sup> | 1.95±1.35×10 <sup>4</sup> | 5.50±0.30×10 <sup>3</sup> |                           | 1.45±0.05×10 <sup>4</sup> |  | 3.40±1.60×10 <sup>3</sup> |  | 6.25±0.85×10 <sup>3</sup> |  | 1.50±0.00×10 <sup>3</sup>  |  |
|      |        |                   | AAP             | 1.34×10 <sup>1</sup>      | 6.91×10 <sup>3</sup>      | 1.59×10 <sup>2</sup>      |                           | 3.15×10 <sup>2</sup>      |  | 4.36×10 <sup>1</sup>      |  | 8.12×10 <sup>1</sup>      |  | 2.03×10 <sup>1</sup>       |  |
|      |        | RO <sub>T</sub>   | Total           | 1.70±0.00×10 <sup>2</sup> | 6.50±0.00×10 <sup>2</sup> | 1.10±0.10×10 <sup>2</sup> |                           | 0                         |  | 1.00±0.00×10 <sup>1</sup> |  | 3.80±1.20×10 <sup>2</sup> |  | 2.00±0.00×10 <sup>1</sup>  |  |
|      |        |                   | Pigmented       | 1.50±0.00×10 <sup>2</sup> | 5.90±0.00×10 <sup>2</sup> | 1.10±0.10×10 <sup>2</sup> |                           | 0                         |  | 1.00±0.00×10 <sup>1</sup> |  | 3.80±1.20×10 <sup>2</sup> |  | 2.00±0.00×10 <sup>1</sup>  |  |
|      |        |                   | AAP             | 0                         | 4.29×10 <sup>2</sup>      | 3.47×10 <sup>1</sup>      |                           | 0                         |  | 0                         |  | 7.60×10 <sup>1</sup>      |  | 0                          |  |
|      |        |                   | Potato          | Total                     | 7.80±0.00×10 <sup>2</sup> | 3.70±0.00×10 <sup>4</sup> | 1.20±0.20×10 <sup>3</sup> | 2.95±0.65×10 <sup>3</sup> |  | 2.50±0.60×10 <sup>2</sup> |  | 1.80±0.20×10 <sup>2</sup> |  | 3.65±0.55×10 <sup>2</sup>  |  |
|      |        |                   | Pigmented       | 2.00±0.00×10 <sup>2</sup> | 5.00±0.00×10 <sup>3</sup> | 7.75±5.75×10 <sup>2</sup> |                           | 1.00±1.00×10 <sup>2</sup> |  | 8.00±3.00×10 <sup>1</sup> |  | 2.50±0.50×10 <sup>1</sup> |  | 1.00±0.10×10 <sup>2</sup>  |  |
|      |        |                   | AAP             | 2.50×10 <sup>1</sup>      | 9.09×10 <sup>2</sup>      | 4.13×10 <sup>2</sup>      |                           | 1.43×10 <sup>1</sup>      |  | 4.71×10 <sup>0</sup>      |  | 8.33×10 <sup>0</sup>      |  | 0                          |  |
|      |        | BG-11             | Total           | 2.14±0.00×10 <sup>3</sup> | 1.00±0.00×10 <sup>6</sup> | 2.31±0.84×10 <sup>4</sup> |                           | 1.86±0.07×10 <sup>4</sup> |  | 1.42±1.07×10 <sup>4</sup> |  | 7.65±1.65×10 <sup>3</sup> |  | N/A                        |  |
|      |        |                   | AOP             | 2.40±0.00×10 <sup>3</sup> | 1.00±0.00×10 <sup>2</sup> | 1.50±0.50×10 <sup>1</sup> |                           | 5.00±5.00×10 <sup>0</sup> |  | 0                         |  | 6.50±2.50×10 <sup>1</sup> |  | N/A                        |  |
|      |        |                   | PNSm            | Total                     | 1.20±0.00×10 <sup>2</sup> | 6.90±0.00×10 <sup>2</sup> | 1.05±0.25×10 <sup>2</sup> | 1.50±0.10×10 <sup>2</sup> |  | 6.00±3.00×10 <sup>1</sup> |  | 2.50±0.50×10 <sup>1</sup> |  | 0                          |  |
|      |        |                   | AnAnP           | 0                         | 1.00±0.00×10 <sup>1</sup> | 0                         |                           | 0                         |  | 0                         |  | 0                         |  | 0                          |  |
|      | Summer | RO                | Total           | 6.75±1.25×10 <sup>3</sup> | 2.01±0.24×10 <sup>3</sup> | 5.40±0.20×10 <sup>2</sup> |                           | 3.35±0.15×10 <sup>3</sup> |  | 1.34±0.15×10 <sup>3</sup> |  | 3.05±0.05×10 <sup>3</sup> |  | 1.53±0.20×10 <sup>3</sup>  |  |
|      |        |                   | Pigmented       | 2.10±0.20×10 <sup>3</sup> | 4.20±0.40×10 <sup>2</sup> | 8.00±5.00×10 <sup>1</sup> |                           | 2.90±0.20×10 <sup>3</sup> |  | 3.70±0.30×10 <sup>2</sup> |  | 2.60±0.30×10 <sup>3</sup> |  | 1.32±0.22×10 <sup>3</sup>  |  |
|      |        |                   | AAP             | 4.20×10 <sup>2</sup>      | 9.16×10 <sup>1</sup>      | 4.21×10 <sup>0</sup>      |                           | 3.45×10 <sup>2</sup>      |  | 3.36×10 <sup>1</sup>      |  | 3.59×10 <sup>2</sup>      |  | 8.22×10 <sup>1</sup>       |  |
|      |        |                   | OM              | Total                     | 1.89±0.27×10 <sup>4</sup> | 1.28±0.24×10 <sup>4</sup> | 1.85±0.25×10 <sup>3</sup> | 1.88±0.04×10 <sup>3</sup> |  | 2.73±0.04×10 <sup>3</sup> |  | 4.90±0.20×10 <sup>3</sup> |  | 4.90±1.10×10 <sup>3</sup>  |  |
|      |        |                   | Pigmented       | 2.35±0.35×10 <sup>3</sup> | 1.35±0.85×10 <sup>3</sup> | 4.00±1.00×10 <sup>2</sup> |                           | 1.19±0.04×10 <sup>3</sup> |  | 6.30±0.70×10 <sup>2</sup> |  | 2.75±0.55×10 <sup>3</sup> |  | 1.45±0.55×10 <sup>3</sup>  |  |
|      |        |                   | AAP             | 2.40×10 <sup>2</sup>      | 1.78×10 <sup>2</sup>      | 3.33×10 <sup>1</sup>      |                           | 3.61×10 <sup>1</sup>      |  | 1.75×10 <sup>1</sup>      |  | 8.87×10 <sup>1</sup>      |  | 9.35×10 <sup>1</sup>       |  |
|      |        | RO <sub>T</sub>   | Total           | 7.40±0.00×10 <sup>2</sup> | 3.00±0.00×10 <sup>2</sup> | 1.10±4.00×10 <sup>2</sup> |                           | 4.05±0.65×10 <sup>2</sup> |  | 3.20±0.00×10 <sup>2</sup> |  | 9.00±0.00×10 <sup>1</sup> |  | 3.40±0.00×10 <sup>2</sup>  |  |
|      |        |                   | Pigmented       | 7.00±0.00×10 <sup>2</sup> | 2.90±0.00×10 <sup>2</sup> | 1.10±0.40×10 <sup>2</sup> |                           | 4.05±0.65×10 <sup>2</sup> |  | 1.00±0.00×10 <sup>2</sup> |  | 9.00±0.00×10 <sup>1</sup> |  | 3.40±0.00×10 <sup>2</sup>  |  |
|      |        |                   | AAP             | 0                         | 0                         | 0                         |                           | 9.42×10 <sup>0</sup>      |  | 0                         |  | 0                         |  | 0                          |  |
|      |        |                   | Potato          | Total                     | 8.88±0.00×10 <sup>2</sup> | 4.50±0.00×10 <sup>2</sup> | 2.20±0.00×10 <sup>3</sup> | 4.00±0.00×10 <sup>3</sup> |  | 8.00±0.00×10 <sup>2</sup> |  | 2.00±0.00×10 <sup>3</sup> |  | 5.70±0.00×10 <sup>2</sup>  |  |
|      |        |                   | Pigmented       | 3.20±0.00×10 <sup>2</sup> | 6.00±0.00×10 <sup>1</sup> | 1.80±0.00×10 <sup>3</sup> |                           | 3.70±0.00×10 <sup>3</sup> |  | 1.90±0.00×10 <sup>2</sup> |  | 7.70±0.00×10 <sup>3</sup> |  | 1.40±0.00×10 <sup>2</sup>  |  |
|      |        |                   | AAP             | 0                         | 0                         | 0                         |                           | 0                         |  | 0                         |  | 0                         |  | 0                          |  |
|      |        | BG-11             | Total           | 2.10±0.00×10 <sup>5</sup> | 9.00±0.00×10 <sup>5</sup> | 7.00±0.00×10 <sup>3</sup> |                           | 6.70±0.00×10 <sup>3</sup> |  | 4.00±0.00×10 <sup>3</sup> |  | 4.70±0.00×10 <sup>3</sup> |  | 3.40±0.00×10 <sup>3</sup>  |  |
|      |        |                   | AOP             | 4.40±0.00×10 <sup>2</sup> | 0                         | 1.20±0.00×10 <sup>2</sup> |                           | 1.00±0.00×10 <sup>2</sup> |  | 0                         |  | 0                         |  | 1.00±0.00×10 <sup>2</sup>  |  |
|      |        |                   | PNSm            | Total                     | 4.80±0.00×10 <sup>2</sup> | 1.60±0.00×10 <sup>2</sup> | 5.00±5.00×10 <sup>0</sup> | 3.00±2.00×10 <sup>1</sup> |  | 2.40±0.00×10 <sup>2</sup> |  | 1.90±0.00×10 <sup>2</sup> |  | 9.00±0.00×10 <sup>1</sup>  |  |
|      |        |                   | AnAnP           | 0                         | 1.00±0.00×10 <sup>1</sup> | 0                         |                           | 0                         |  | 0                         |  | 0                         |  | 0                          |  |
|      | Fall   | RO                | Total           | 1.41±0.60×10 <sup>4</sup> | 1.07±0.11×10 <sup>5</sup> | 6.15±0.65×10 <sup>2</sup> |                           | 8.35±1.35×10 <sup>3</sup> |  | 1.20±0.40×10 <sup>2</sup> |  | 7.45±1.65×10 <sup>2</sup> |  | 4.35±0.85×10 <sup>2</sup>  |  |
|      |        |                   | Pigmented       | 4.60±4.10×10 <sup>3</sup> | 1.10±0.40×10 <sup>5</sup> | 4.65±0.85×10 <sup>2</sup> |                           | 7.40±1.50×10 <sup>3</sup> |  | 7.50±1.50×10 <sup>1</sup> |  | 3.15±0.85×10 <sup>2</sup> |  | 2.60±0.50×10 <sup>2</sup>  |  |
|      |        |                   | AAP             | 8.00×10 <sup>2</sup>      | 7.33×10 <sup>3</sup>      | 0                         |                           | 3.08×10 <sup>2</sup>      |  | 0                         |  | 0                         |  | 0                          |  |
|      |        |                   | OM              | Total                     | 8.25±1.55×10 <sup>4</sup> | 1.15±0.45×10 <sup>6</sup> | 2.57±0.69×10 <sup>3</sup> | 9.80±1.60×10 <sup>3</sup> |  | 1.61±0.02×10 <sup>3</sup> |  | 5.70±0.00×10 <sup>3</sup> |  | 1.90±0.62×10 <sup>3</sup>  |  |
|      |        |                   | Pigmented       | 1.35±0.15×10 <sup>4</sup> | 1.50±0.50×10 <sup>5</sup> | 4.40±0.60×10 <sup>2</sup> |                           | 8.05±1.15×10 <sup>3</sup> |  | 4.10±1.30×10 <sup>2</sup> |  | 9.50±2.50×10 <sup>2</sup> |  | 3.70±1.30×10 <sup>2</sup>  |  |
|      |        |                   | AAP             | 1.35×10 <sup>3</sup>      | 0                         | 0                         |                           | 0                         |  | 0                         |  | 0                         |  | 0                          |  |
|      |        | RO <sub>T</sub>   | Total           | 3.80±0.00×10 <sup>2</sup> | 4.00±0.00×10 <sup>4</sup> | 0                         |                           | 3.10±0.00×10 <sup>3</sup> |  | 1.10±0.00×10 <sup>2</sup> |  | 5.00±0.00×10 <sup>1</sup> |  | 1.60±0.00×10 <sup>2</sup>  |  |
|      |        |                   | Pigmented       | 3.80±0.00×10 <sup>2</sup> | 3.90±0.00×10 <sup>4</sup> | 0                         |                           | 3.10±0.00×10 <sup>3</sup> |  | 1.10±0.00×10 <sup>2</sup> |  | 4.00±0.00×10 <sup>1</sup> |  | 1.50±0.00×10 <sup>2</sup>  |  |
|      |        |                   | AAP             | 0                         | 0                         | 0                         |                           | 0                         |  | 0                         |  | 0                         |  | 0                          |  |
|      |        |                   | Potato          | Total                     | 5.60±0.00×10 <sup>3</sup> | 6.50±0.00×10 <sup>4</sup> | 3.80±0.00×10 <sup>2</sup> | 4.30±0.00×10 <sup>3</sup> |  | 2.90±0.00×10 <sup>2</sup> |  | 2.90±0.00×10 <sup>2</sup> |  | 4.40±0.00×10 <sup>2</sup>  |  |
|      |        |                   | Pigmented       | 2.10±0.00×10 <sup>3</sup> | 5.50±0.00×10 <sup>4</sup> | 2.00±0.00×10 <sup>2</sup> |                           | 4.30±0.00×10 <sup>3</sup> |  | 2.00±0.00×10 <sup>2</sup> |  | 2.20±0.00×10 <sup>2</sup> |  | 3.90±0.00×10 <sup>2</sup>  |  |
|      |        |                   | AAP             | 0                         | 0                         | 0                         |                           | 0                         |  | 0                         |  | 0                         |  | 0                          |  |
|      |        | BG-11             | Total           | 3.50±0.20×10 <sup>4</sup> | 3.25±0.86×10 <sup>5</sup> | 8.70±0.00×10 <sup>3</sup> |                           | 1.05±0.00×10 <sup>4</sup> |  | 2.40±0.00×10 <sup>2</sup> |  | 1.60±0.00×10 <sup>2</sup> |  | 1.63±0.00×10 <sup>4</sup>  |  |
|      |        |                   | AOP             | 8.50±0.50×10 <sup>1</sup> | 5.25±0.25×10 <sup>2</sup> | 4.00±0.00×10 <sup>1</sup> |                           | 2.00±0.00×10 <sup>1</sup> |  | 0                         |  | 1.00±0.00×10 <sup>1</sup> |  | 2.00±0.00×10 <sup>1</sup>  |  |
|      |        |                   | PNSm            | Total                     | 1.30±0.00×10 <sup>2</sup> | 1.01±0.00×10 <sup>3</sup> | 6.00±0.00×10 <sup>1</sup> | 2.00±0.00×10 <sup>1</sup> |  | 5.00±0.00×10 <sup>1</sup> |  | 9.00±0.00×10 <sup>1</sup> |  | 1.00±0.00×10 <sup>1</sup>  |  |
|      |        |                   | AnAnP           | 0                         | N/A                       | 0                         |                           | 0                         |  | 0                         |  | 0                         |  | 0                          |  |
| 2017 | Winter | Alternative Sites |                 |                           |                           | W10                       |                           | W1                        |  | W9                        |  | W6                        |  | W8                         |  |
|      |        |                   | RO              | Total                     | N/A                       | N/A                       |                           | N/A                       |  | 2.00±0.00×10 <sup>1</sup> |  | N/A                       |  | N/A                        |  |
|      |        |                   | Pigmented       | N/A                       | N/A                       | N/A                       |                           | N/A                       |  | 1.00±0.5010 <sup>1</sup>  |  | N/A                       |  | N/A                        |  |
|      |        |                   | AAP             | N/A                       | N/A                       | N/A                       |                           | N/A                       |  | 0                         |  | N/A                       |  | N/A                        |  |
|      |        | OM                | Total           | N/A                       | N/A                       | N/A                       |                           | N/A                       |  | 1.44±0.50×10 <sup>1</sup> |  | N/A                       |  | N/A                        |  |
|      |        |                   | Pigmented       | N/A                       | N/A                       | N/A                       |                           | N/A                       |  | 3.33±0.00×10 <sup>0</sup> |  | N/A                       |  | N/A                        |  |
|      |        |                   | AAP             | N/A                       | N/A                       | N/A                       |                           | N/A                       |  | 0                         |  | N/A                       |  | N/A                        |  |
|      |        |                   | RO <sub>T</sub> | Total                     | N/A                       | N/A                       |                           | N/A                       |  | 6.67±0.50×10 <sup>0</sup> |  | N/A                       |  | N/A                        |  |
|      |        |                   | Pigmented       | N/A                       | N/A                       | N/A                       |                           | N/A                       |  | 3.33±0.00×10 <sup>0</sup> |  | N/A                       |  | N/A                        |  |
|      |        |                   | AAP             | N/A                       | N/A                       | N/A                       |                           | N/A                       |  | 0                         |  | N/A                       |  | N/A                        |  |
|      |        | Potato            | Total           | N/A                       | N/A                       | N/A                       |                           | N/A                       |  | 3.33±0.00×10 <sup>0</sup> |  | N/A                       |  | N/A                        |  |
|      |        |                   | Pigmented       | N/A                       | N/A                       | N/A                       |                           | N/A                       |  | 0                         |  | N/A                       |  | N/A                        |  |
|      |        |                   | AAP             | N/A                       | N/A                       | N/A                       |                           | N/A                       |  | 0                         |  | N/A                       |  | N/A                        |  |
|      |        |                   | BG-11           | Total                     | N/A                       | N/A                       |                           | N/A                       |  | 7.67±3.00×10 <sup>1</sup> |  | N/A                       |  | N/A                        |  |
|      |        |                   | AOP             | N/A                       | N/A                       | N/A                       |                           | N/A                       |  | 0                         |  | N/A                       |  | N/A                        |  |
|      |        | PNSm              | Total           | N/A                       | N/A                       | N/A                       |                           | N/A                       |  | 1.33±0.50×10 <sup>1</sup> |  | N/A                       |  | N/A                        |  |
|      |        |                   | AnAnP           | N/A                       | N/A                       | N/A                       |                           | N/A                       |  | 0                         |  | N/A                       |  | N/A                        |  |

**Table S4. Continued (5/7).**

| Year | Season | Medium            |           | 5                         |                           | 6                         | 7                         | 8                         | 9                         | 10                        |
|------|--------|-------------------|-----------|---------------------------|---------------------------|---------------------------|---------------------------|---------------------------|---------------------------|---------------------------|
|      |        |                   |           | liquid                    | sediment                  | liquid                    | liquid                    | liquid                    | liquid                    | liquid                    |
| 2017 | Spring | RO                | Total     | 5.10±0.25×10 <sup>3</sup> | 1.23±0.07×10 <sup>4</sup> | 2.09±0.97×10 <sup>3</sup> | 1.08±0.26×10 <sup>3</sup> | 1.94±0.23×10 <sup>4</sup> | 8.30±0.70×10 <sup>3</sup> | 6.40±0.60×10 <sup>3</sup> |
|      |        |                   | Pigmented | 2.50±0.40×10 <sup>3</sup> | 3.80±0.25×10 <sup>3</sup> | 4.33±5.01×10 <sup>2</sup> | 9.67±1.00×10 <sup>1</sup> | 1.44±0.48×10 <sup>4</sup> | 4.50±0.35×10 <sup>3</sup> | 5.20±0.20×10 <sup>3</sup> |
|      |        |                   | AAP       | 1.12×10 <sup>3</sup>      | 3.68×10 <sup>2</sup>      | 0                         | 8.79×10 <sup>0</sup>      | 1.80×10 <sup>3</sup>      | 4.29×10 <sup>2</sup>      | 8.67×10 <sup>2</sup>      |
|      |        | OM                | Total     | 1.23±0.03×10 <sup>4</sup> | 7.97±0.40×10 <sup>4</sup> | 3.05±0.11×10 <sup>3</sup> | 2.35±0.18×10 <sup>3</sup> | 3.35±0.11×10 <sup>4</sup> | 1.18±0.04×10 <sup>4</sup> | 9.67±1.55×10 <sup>3</sup> |
|      |        |                   | Pigmented | 2.67±0.35×10 <sup>3</sup> | 8.67±3.00×10 <sup>3</sup> | 1.63±0.42×10 <sup>2</sup> | 8.33±0.00×10 <sup>1</sup> | 2.37±0.13×10 <sup>4</sup> | 2.93±0.75×10 <sup>3</sup> | 5.03±2.10×10 <sup>3</sup> |
|      |        |                   | AAP       | 7.41×10 <sup>2</sup>      | 1.93×10 <sup>3</sup>      | 2.04×10 <sup>1</sup>      | 0                         | 3.38×10 <sup>3</sup>      | 1.30×10 <sup>3</sup>      | 3.36×10 <sup>3</sup>      |
|      |        | RO <sub>T</sub>   | Total     | 1.17±0.30×10 <sup>2</sup> | 5.67±2.50×10 <sup>1</sup> | 0                         | 0                         | 6.67±5.00×10 <sup>0</sup> | 6.67±0.00×10 <sup>0</sup> | 0                         |
|      |        |                   | Pigmented | 7.00±0.50×10 <sup>1</sup> | 2.00±3.00×10 <sup>1</sup> | 0                         | 0                         | 3.33±0.00×10 <sup>0</sup> | 6.67±0.00×10 <sup>0</sup> | 0                         |
|      |        |                   | AAP       | 0                         | 6.67×10 <sup>0</sup>      | 0                         | 0                         | 0                         | 0                         | 0                         |
|      |        | Potato            | Total     | 8.67±2.50×10 <sup>2</sup> | 8.33±2.00×10 <sup>3</sup> | 1.00±0.36×10 <sup>3</sup> | 2.40±0.10×10 <sup>3</sup> | 1.03±0.15×10 <sup>3</sup> | 1.10±0.10×10 <sup>3</sup> | 5.67±2.50×10 <sup>2</sup> |
|      |        |                   | Pigmented | 7.80±0.40×10 <sup>3</sup> | 1.14±0.05×10 <sup>5</sup> | 4.63±0.79×10 <sup>3</sup> | 3.67±0.50×10 <sup>3</sup> | 3.47±0.25×10 <sup>3</sup> | 1.80±0.15×10 <sup>3</sup> | 9.33±1.50×10 <sup>2</sup> |
|      |        |                   | AAP       | 1.49×10 <sup>3</sup>      | 4.97×10 <sup>3</sup>      | 1.05×10 <sup>3</sup>      | 2.44×10 <sup>2</sup>      | 2.04×10 <sup>2</sup>      | 4.29×10 <sup>2</sup>      | 5.33×10 <sup>2</sup>      |
|      |        | BG-11             | Total     | 2.29±0.09×10 <sup>4</sup> | 1.55±0.08×10 <sup>5</sup> | 6.00±0.00×10 <sup>3</sup> | 2.92±0.20×10 <sup>3</sup> | 1.38±0.65×10 <sup>4</sup> | 1.21±0.13×10 <sup>4</sup> | 6.83±0.25×10 <sup>3</sup> |
|      |        |                   | AOP       | 2.30±1.80×10 <sup>2</sup> | 2.00±0.50×10 <sup>2</sup> | 2.03±2.74×10 <sup>2</sup> | 2.77±0.15×10 <sup>2</sup> | 0                         | 0                         | 0                         |
|      |        |                   | AOP       | 2.30±1.80×10 <sup>2</sup> | 2.00±0.50×10 <sup>2</sup> | 2.03±2.74×10 <sup>2</sup> | 2.77±0.15×10 <sup>2</sup> | 0                         | 0                         | 0                         |
|      |        | PNSm              | Total     | 1.10±0.45×10 <sup>2</sup> | 1.41±0.54×10 <sup>3</sup> | 4.00±1.63×10 <sup>1</sup> | 0                         | 9.33±0.50×10 <sup>1</sup> | 5.67±0.50×10 <sup>1</sup> | 3.37±0.10×10 <sup>2</sup> |
|      |        |                   | AnAnP     | 0                         | 2.70±0.35×10 <sup>2</sup> | 0                         | 0                         | 0                         | 0                         | 0                         |
|      |        |                   | AnAnP     | 0                         | 2.70±0.35×10 <sup>2</sup> | 0                         | 0                         | 0                         | 0                         | 0                         |
|      | Summer | RO                | Total     | 1.45±0.00×10 <sup>4</sup> | 5.15±0.25×10 <sup>5</sup> | 5.37±0.13×10 <sup>3</sup> | 4.92±0.73×10 <sup>3</sup> | 7.80±0.95×10 <sup>2</sup> | 3.20±0.65×10 <sup>3</sup> | 8.03±0.25×10 <sup>2</sup> |
|      |        |                   | Pigmented | 4.50±0.00×10 <sup>3</sup> | 1.55±0.15×10 <sup>5</sup> | 4.50±0.08×10 <sup>3</sup> | 4.11±0.61×10 <sup>3</sup> | 1.63±0.05×10 <sup>2</sup> | 9.67±1.00×10 <sup>2</sup> | 4.40±0.30×10 <sup>2</sup> |
|      |        |                   | AAP       | 0                         | 0                         | 1.88×10 <sup>2</sup>      | 1.21×10 <sup>2</sup>      | 1.63×10 <sup>1</sup>      | 1.38×10 <sup>2</sup>      | 0                         |
|      |        | OM                | Total     | 1.77±0.65×10 <sup>4</sup> | 1.40±0.11×10 <sup>5</sup> | 5.60±1.06×10 <sup>3</sup> | 5.44±0.46×10 <sup>3</sup> | 1.21±0.00×10 <sup>3</sup> | 4.47±0.15×10 <sup>3</sup> | 1.47±0.01×10 <sup>3</sup> |
|      |        |                   | Pigmented | 2.43±0.00×10 <sup>3</sup> | 2.33±0.20×10 <sup>5</sup> | 4.53±1.10×10 <sup>3</sup> | 4.37±0.29×10 <sup>3</sup> | 2.10±0.00×10 <sup>2</sup> | 1.10±0.40×10 <sup>3</sup> | 5.17±0.70×10 <sup>2</sup> |
|      |        |                   | AAP       | 8.39×10 <sup>1</sup>      | 1.46×10 <sup>4</sup>      | 1.36×10 <sup>3</sup>      | 0                         | 2.10×10 <sup>1</sup>      | 8.80×10 <sup>1</sup>      | 0                         |
|      |        | RO <sub>T</sub>   | Total     | 9.33±2.00×10 <sup>1</sup> | 1.40±0.65×10 <sup>3</sup> | 1.37±0.24×10 <sup>2</sup> | 1.47±0.10×10 <sup>2</sup> | 2.67±0.50×10 <sup>1</sup> | 3.67±0.00×10 <sup>1</sup> | 4.67±3.00×10 <sup>1</sup> |
|      |        |                   | Pigmented | 8.33±0.50×10 <sup>1</sup> | 1.13±0.40×10 <sup>3</sup> | 1.23±0.13×10 <sup>2</sup> | 1.30±0.00×10 <sup>2</sup> | 1.67±1.50×10 <sup>1</sup> | 3.67±0.00×10 <sup>1</sup> | 4.33±3.00×10 <sup>1</sup> |
|      |        |                   | AAP       | 0                         | 0                         | 0                         | 0                         | 0                         | 0                         | 0                         |
|      |        | Potato            | Total     | 3.90±0.95×10 <sup>3</sup> | 7.83±3.10×10 <sup>4</sup> | 6.30±0.78×10 <sup>2</sup> | 6.10±0.40×10 <sup>3</sup> | 6.57±0.05×10 <sup>2</sup> | 1.16±0.09×10 <sup>3</sup> | 5.63±1.05×10 <sup>2</sup> |
|      |        |                   | Pigmented | 1.97±0.45×10 <sup>3</sup> | 2.37±1.00×10 <sup>4</sup> | 5.13±0.74×10 <sup>3</sup> | 5.23±0.50×10 <sup>3</sup> | 1.07±0.05×10 <sup>2</sup> | 3.80±0.45×10 <sup>2</sup> | 3.23±0.25×10 <sup>2</sup> |
|      |        |                   | AAP       | 1.64×10 <sup>2</sup>      | 1.18×10 <sup>3</sup>      | 0                         | 0                         | 9.28×10 <sup>0</sup>      | 2.38×10 <sup>1</sup>      | 2.81×10 <sup>1</sup>      |
|      |        | BG-11             | Total     | 4.30±1.35×10 <sup>4</sup> | 1.83±0.30×10 <sup>6</sup> | 4.27±0.13×10 <sup>3</sup> | 7.40±1.00×10 <sup>3</sup> | 1.29±0.21×10 <sup>4</sup> | 1.39±0.08×10 <sup>3</sup> | 1.66±0.14×10 <sup>3</sup> |
|      |        |                   | AOP       | 1.93±0.15×10 <sup>3</sup> | 0                         | 9.33±2.05×10 <sup>1</sup> | 2.00±0.00×10 <sup>1</sup> | 8.33±6.00×10 <sup>2</sup> | 0                         | 0                         |
|      |        |                   | AOP       | 1.93±0.15×10 <sup>3</sup> | 0                         | 9.33±2.05×10 <sup>1</sup> | 2.00±0.00×10 <sup>1</sup> | 8.33±6.00×10 <sup>2</sup> | 0                         | 0                         |
|      |        | PNSm              | Total     | 9.30±0.15×10 <sup>2</sup> | 1.03±0.55×10 <sup>4</sup> | 2.67±0.47×10 <sup>1</sup> | 2.67±0.5×10 <sup>1</sup>  | 1.30±0.45×10 <sup>2</sup> | 5.00±0.00×10 <sup>1</sup> | 3.00±1.00×10 <sup>1</sup> |
|      |        |                   | AnAnP     | 3.33±5.00×10 <sup>0</sup> | 1.67±0.50×10 <sup>1</sup> | 0                         | 0                         | 0                         | 0                         | 0                         |
|      |        |                   | AnAnP     | 3.33±5.00×10 <sup>0</sup> | 1.67±0.50×10 <sup>1</sup> | 0                         | 0                         | 0                         | 0                         | 0                         |
|      | Fall   | RO                | Total     | 9.30±0.30×10 <sup>3</sup> | 2.50±0.14×10 <sup>5</sup> | 1.03±0.56×10 <sup>4</sup> | 5.57±0.40×10 <sup>3</sup> | 8.73±2.45×10 <sup>3</sup> | 1.01±0.22×10 <sup>3</sup> | 3.87±0.25×10 <sup>3</sup> |
|      |        |                   | Pigmented | 2.93±0.10×10 <sup>3</sup> | 5.10±0.55×10 <sup>4</sup> | 5.70±4.05×10 <sup>3</sup> | 2.83±0.15×10 <sup>3</sup> | 2.30±0.90×10 <sup>3</sup> | 1.47±0.05×10 <sup>2</sup> | 1.10±0.50×10 <sup>3</sup> |
|      |        |                   | AAP       | 7.04×10 <sup>2</sup>      | 5.80×10 <sup>2</sup>      | 0                         | 0                         | 0                         | 0                         | 0                         |
|      |        | OM                | Total     | 1.41±0.14×10 <sup>4</sup> | 9.87±2.40×10 <sup>4</sup> | 2.59±0.26×10 <sup>4</sup> | 7.73±0.28×10 <sup>3</sup> | 5.60±0.10×10 <sup>4</sup> | 6.23±1.50×10 <sup>3</sup> | 1.28±0.08×10 <sup>4</sup> |
|      |        |                   | Pigmented | 2.00±0.70×10 <sup>3</sup> | 3.67±0.75×10 <sup>4</sup> | 5.87±0.42×10 <sup>3</sup> | 3.43±0.90×10 <sup>3</sup> | 1.13±0.45×10 <sup>4</sup> | 8.67±4.50×10 <sup>2</sup> | 3.70±1.85×10 <sup>3</sup> |
|      |        |                   | AAP       | 0                         | 9.91×10 <sup>2</sup>      | 0                         | 0                         | 0                         | 0                         | 0                         |
|      |        | RO <sub>T</sub>   | Total     | 2.70±0.30×10 <sup>2</sup> | 4.17±0.65×10 <sup>3</sup> | 1.33±0.96×10 <sup>2</sup> | 1.67±0.15×10 <sup>2</sup> | 2.00±0.00×10 <sup>1</sup> | 0                         | 0                         |
|      |        |                   | Pigmented | 2.70±0.30×10 <sup>2</sup> | 4.03±0.55×10 <sup>3</sup> | 1.33±0.96×10 <sup>2</sup> | 1.63±0.20×10 <sup>2</sup> | 2.00±0.00×10 <sup>1</sup> | 0                         | 0                         |
|      |        |                   | AAP       | 0                         | 0                         | 0                         | 0                         | 0                         | 0                         | 0                         |
|      |        | Potato            | Total     | 4.27±0.50×10 <sup>3</sup> | 1.89±0.15×10 <sup>4</sup> | 5.10±0.99×10 <sup>3</sup> | 1.06±0.15×10 <sup>3</sup> | 7.53±1.10×10 <sup>3</sup> | 8.77±0.20×10 <sup>2</sup> | 1.29±0.13×10 <sup>3</sup> |
|      |        |                   | Pigmented | 1.97±0.35×10 <sup>3</sup> | 5.87±0.40×10 <sup>3</sup> | 2.70±0.74×10 <sup>3</sup> | 4.77±0.70×10 <sup>2</sup> | 1.40±0.65×10 <sup>3</sup> | 1.40±0.10×10 <sup>2</sup> | 2.40±0.40×10 <sup>2</sup> |
|      |        |                   | AAP       | 8.55×10 <sup>1</sup>      | 4.51×10 <sup>2</sup>      | 0                         | 0                         | 0                         | 0                         | 0                         |
|      |        | BG-11             | Total     | 4.13±0.40×10 <sup>4</sup> | 1.26±0.08×10 <sup>5</sup> | 2.90±0.08×10 <sup>4</sup> | 8.17±0.75×10 <sup>2</sup> | 1.67±0.90×10 <sup>2</sup> | 1.30±0.15×10 <sup>2</sup> | 1.38±1.08×10 <sup>4</sup> |
|      |        |                   | AOP       | 7.33±0.00×10 <sup>2</sup> | 1.70±0.05×10 <sup>3</sup> | 2.67±0.09×10 <sup>1</sup> | 1.00±0.50×10 <sup>1</sup> | 0                         | 3.3±0.00×10 <sup>0</sup>  | 1.33±1.00×10 <sup>1</sup> |
|      |        |                   | AOP       | 7.33±0.00×10 <sup>2</sup> | 1.70±0.05×10 <sup>3</sup> | 2.67±0.09×10 <sup>1</sup> | 1.00±0.50×10 <sup>1</sup> | 0                         | 3.3±0.00×10 <sup>0</sup>  | 1.33±1.00×10 <sup>1</sup> |
|      |        | PNSm              | Total     | 8.67±1.50×10 <sup>1</sup> | 1.52±1.73×10 <sup>4</sup> | 1.33±0.47×10 <sup>1</sup> | 1.33±0.50×10 <sup>1</sup> | 1.20±0.30×10 <sup>2</sup> | 1.67±1.50×10 <sup>1</sup> | 1.67±1.50×10 <sup>1</sup> |
|      |        |                   | AnAnP     | 0                         | 2.67±0.00×10 <sup>1</sup> | 0                         | 0                         | 0                         | 0                         | 0                         |
|      |        |                   | AnAnP     | 0                         | 2.67±0.00×10 <sup>1</sup> | 0                         | 0                         | 0                         | 0                         | 0                         |
| 2018 | Winter | Alternative Sites |           |                           |                           | W10                       | W1                        | W9                        | W6                        | W8                        |
|      |        | RO                | Total     | N/A                       | N/A                       | 8.20±0.60×10 <sup>2</sup> | 4.03±0.21×10 <sup>2</sup> | 8.63±0.90×10 <sup>2</sup> | 1.09±0.04×10 <sup>3</sup> | 1.53±0.05×10 <sup>2</sup> |
|      |        |                   | Pigmented | N/A                       | N/A                       | 4.43±2.15×10 <sup>2</sup> | 2.47±0.47×10 <sup>2</sup> | 5.57±0.05×10 <sup>2</sup> | 6.80±0.10×10 <sup>2</sup> | 7.00±0.5×10 <sup>1</sup>  |
|      |        |                   | AAP       | N/A                       | N/A                       | 0                         | 0                         | 0                         | 0                         | 1.48×10 <sup>1</sup>      |
|      |        | OM                | Total     | N/A                       | N/A                       | 1.54±0.06×10 <sup>3</sup> | 6.65±1.15×10 <sup>2</sup> | 1.64±0.00×10 <sup>3</sup> | 1.52±0.19×10 <sup>3</sup> | 3.70±0.55×10 <sup>2</sup> |
|      |        |                   | Pigmented | N/A                       | N/A                       | 8.50±0.15×10 <sup>2</sup> | 3.15±0.15×10 <sup>2</sup> | 9.20±0.00×10 <sup>2</sup> | 3.00±0.60×10 <sup>2</sup> | 8.00±1.50×10 <sup>1</sup> |
|      |        |                   | AAP       | N/A                       | N/A                       | 0                         | 0                         | 0                         | 0                         | 0                         |
|      |        | RO <sub>T</sub>   | Total     | N/A                       | N/A                       | 6.67±0.50×10 <sup>1</sup> | 6.67±9.43×10 <sup>0</sup> | 7.00±1.50×10 <sup>1</sup> | 5.00±1.00×10 <sup>1</sup> | 6.67±5.00×10 <sup>0</sup> |
|      |        |                   | Pigmented | N/A                       | N/A                       | 4.67±0.00×10 <sup>1</sup> | 6.67±9.43×10 <sup>0</sup> | 6.67±1.50×10 <sup>1</sup> | 3.00±4.00×10 <sup>1</sup> | 6.67±5.00×10 <sup>0</sup> |
|      |        |                   | AAP       | N/A                       | N/A                       | 0                         | 0                         | 0                         | 0                         | 0                         |
|      |        | Potato            | Total     | N/A                       | N/A                       | 7.90±0.20×10 <sup>2</sup> | N/A                       | 7.75±1.15×10 <sup>2</sup> | N/A                       | 1.77±0.45×10 <sup>2</sup> |
|      |        |                   | Pigmented | N/A                       | N/A                       | 6.27±0.50×10 <sup>2</sup> | N/A                       | 7.05±1.35×10 <sup>2</sup> | N/A                       | 7.00±2.50×10 <sup>1</sup> |
|      |        |                   | AAP       | N/A                       | N/A                       | 0                         | 0                         | 0                         | 0                         | 0                         |
|      |        | BG-11             | Total     | N/A                       | N/A                       | 1.79±0.03×10 <sup>3</sup> | 4.60±4.81×10 <sup>2</sup> | 1.49±0.32×10 <sup>3</sup> | 1.85±1.22×10 <sup>3</sup> | 7.27±2.20×10 <sup>2</sup> |
|      |        |                   | AOP       | N/A                       | N/A                       | 0                         | 0                         | 0                         | 0                         | 0                         |
|      |        |                   | AOP       | N/A                       | N/A                       | 0                         | 0                         | 0                         | 0                         | 0                         |
|      |        | PNSm              | Total     | N/A                       | N/A                       | 0                         | 0                         | 0.67±1.00×10 <sup>1</sup> | 3.00±0.50×10 <sup>1</sup> | 3.33±5.00×10 <sup>0</sup> |
|      |        |                   | AnAnP     | N/A                       | N/A                       | 0                         | 0                         | 0                         | 0                         | 0                         |
|      |        |                   | AnAnP     | N/A                       | N/A                       | 0                         | 0                         | 0                         | 0                         | 0                         |

**Table S4. Continued (6/7).**

| Year | Season | Medium            |           | 5                         |                           | 6                         | 7                         | 8                          | 9                         | 10                        |
|------|--------|-------------------|-----------|---------------------------|---------------------------|---------------------------|---------------------------|----------------------------|---------------------------|---------------------------|
|      |        |                   |           | liquid                    | sediment                  | liquid                    | liquid                    | liquid                     | liquid                    | liquid                    |
| 2018 | Spring | RO                | Total     | 5.93±0.90×10 <sup>2</sup> | 5.07±0.30×10 <sup>4</sup> | 9.93±0.81×10 <sup>2</sup> | 3.63±1.10×10 <sup>3</sup> | 9.27±1.50×10 <sup>2</sup>  | 1.10±0.24×10 <sup>3</sup> | 7.00±0.00×10 <sup>2</sup> |
|      |        |                   | Pigmented | 2.50±0.20×10 <sup>3</sup> | 1.60±0.15×10 <sup>4</sup> | 3.67±0.21×10 <sup>2</sup> | 1.97±0.60×10 <sup>3</sup> | 2.97±0.25×10 <sup>2</sup>  | 5.47±0.55×10 <sup>2</sup> | 2.50±0.00×10 <sup>2</sup> |
|      |        |                   | AAP       | 3.91×10 <sup>2</sup>      | 2.46×10 <sup>3</sup>      | 0                         | 5.46×10 <sup>1</sup>      | 0                          | 4.56×10 <sup>1</sup>      | 1.67×10 <sup>1</sup>      |
|      |        | OM                | Total     | 1.08±0.50×10 <sup>3</sup> | 1.22±0.43×10 <sup>5</sup> | 3.75±0.26×10 <sup>3</sup> | 9.30±0.15×10 <sup>3</sup> | 3.77±0.90×10 <sup>3</sup>  | 6.37±1.10×10 <sup>3</sup> | 6.67±0.45×10 <sup>3</sup> |
|      |        |                   | Pigmented | 1.77±0.50×10 <sup>3</sup> | 1.77±1.15×10 <sup>4</sup> | 4.47±0.54×10 <sup>2</sup> | 1.70±0.10×10 <sup>3</sup> | 1.13±0.30×10 <sup>3</sup>  | 7.00±1.00×10 <sup>2</sup> | 6.63±2.00×10 <sup>2</sup> |
|      |        |                   | AAP       | 0                         | 0                         | 0                         | 5.15×10 <sup>1</sup>      | 0                          | 0                         | 4.87×10 <sup>1</sup>      |
|      |        | RO <sub>T</sub>   | Total     | 1.47±0.10×10 <sup>2</sup> | 2.77±0.30×10 <sup>3</sup> | 1.67±0.94×10 <sup>1</sup> | 3.33±2.00×10 <sup>1</sup> | 2.00±1.50×10 <sup>1</sup>  | 0                         | 0.67±1.00×10 <sup>1</sup> |
|      |        |                   | Pigmented | 1.10±0.15×10 <sup>2</sup> | 2.50±0.10×10 <sup>3</sup> | 1.33±1.25×10 <sup>1</sup> | 3.33±2.00×10 <sup>1</sup> | 2.00±1.50×10 <sup>1</sup>  | 0                         | 0.67±1.00×10 <sup>1</sup> |
|      |        |                   | AAP       | 0                         | 8.33×10 <sup>2</sup>      | 0                         | 0                         | 0                          | 0                         | 0                         |
|      |        | Potato            | Total     | 1.09±0.23×10 <sup>3</sup> | 7.93±2.65×10 <sup>3</sup> | 2.43±0.61×10 <sup>2</sup> | 3.07±0.30×10 <sup>2</sup> | 2.07±0.25×10 <sup>2</sup>  | 3.00±1.50×10 <sup>1</sup> | 2.33±1.00×10 <sup>1</sup> |
|      |        |                   | Pigmented | 5.13±2.40×10 <sup>2</sup> | 1.20±0.40×10 <sup>3</sup> | 1.30±0.36×10 <sup>2</sup> | 1.87±0.20×10 <sup>2</sup> | 2.33±1.50×10 <sup>1</sup>  | 1.67±1.00×10 <sup>1</sup> | 1.00±0.50×10 <sup>1</sup> |
|      |        |                   | AAP       | 1.12×10 <sup>2</sup>      | 2.18×10 <sup>2</sup>      | 0                         | 0                         | 0                          | 0                         | 0                         |
|      |        | BG-11             | Total     | 1.45±0.08×10 <sup>4</sup> | 4.47±0.15×10 <sup>5</sup> | 2.15±0.16×10 <sup>3</sup> | 1.97±0.05×10 <sup>3</sup> | 1.59±0.012×10 <sup>3</sup> | 5.23±1.15×10 <sup>3</sup> | 1.67±0.50×10 <sup>2</sup> |
|      |        |                   | AOP       | 5.33±0.50×10 <sup>1</sup> | 3.33±5.00×10 <sup>2</sup> | 1.53±0.18×10 <sup>3</sup> | 9.00±5.00×10 <sup>1</sup> | 1.90±0.65×10 <sup>2</sup>  | 0                         | 0                         |
|      |        |                   | AAP       | 1.12×10 <sup>2</sup>      | 2.18×10 <sup>2</sup>      | 0                         | 0                         | 0                          | 0                         | 0                         |
|      |        | PNSm              | Total     | 3.33±2.50×10 <sup>1</sup> | 1.16±0.01×10 <sup>3</sup> | 5.87±1.66×10 <sup>2</sup> | 3.00±1.00×10 <sup>1</sup> | 9.33±4.50×10 <sup>1</sup>  | 2.67±0.00×10 <sup>1</sup> | 5.00±1.50×10 <sup>1</sup> |
|      |        |                   | AnAnP     | 0                         | 0                         | 0                         | 0                         | 0                          | 0                         | 0                         |
|      |        |                   | AAP       | 0                         | 0                         | 0                         | 0                         | 0                          | 0                         | 0                         |
|      | Summer | RO                | Total     | 1.55±0.12×10 <sup>4</sup> | 5.67±0.40×10 <sup>4</sup> | 8.67±0.94×10 <sup>1</sup> | 4.50±0.00×10 <sup>1</sup> | 1.70±0.10×10 <sup>2</sup>  | 3.15±0.00×10 <sup>2</sup> | 2.17±0.00×10 <sup>3</sup> |
|      |        |                   | Pigmented | 8.23±2.00×10 <sup>3</sup> | 2.87±1.00×10 <sup>4</sup> | 0                         | 5.00±0.00×10 <sup>0</sup> | 2.67±0.00×10 <sup>1</sup>  | 1.45±0.00×10 <sup>2</sup> | 3.30±0.00×10 <sup>2</sup> |
|      |        |                   | AAP       | 0                         | 0                         | 0                         | 0                         | 0                          | 0                         | 0                         |
|      |        | OM                | Total     | 2.34±0.05×10 <sup>4</sup> | 1.45±0.21×10 <sup>5</sup> | 3.27±0.85×10 <sup>2</sup> | 8.77±1.40×10 <sup>2</sup> | 3.97±0.30×10 <sup>2</sup>  | 1.25±0.13×10 <sup>3</sup> | 2.70±0.79×10 <sup>3</sup> |
|      |        |                   | Pigmented | 6.13±0.90×10 <sup>3</sup> | 3.00±1.00×10 <sup>4</sup> | 5.33±2.87×10 <sup>1</sup> | 6.67±0.50×10 <sup>1</sup> | 1.00±0.35×10 <sup>2</sup>  | 1.77±0.10×10 <sup>2</sup> | 4.50±2.80×10 <sup>2</sup> |
|      |        |                   | AAP       | 0                         | 0                         | 0                         | 0                         | 0                          | 0                         | 0                         |
|      |        | RO <sub>T</sub>   | Total     | 1.08±0.02×10 <sup>3</sup> | 1.16±0.04×10 <sup>4</sup> | 3.33±4.71×10 <sup>0</sup> | 3.30±5.00×10 <sup>0</sup> | 6.67±0.00×10 <sup>0</sup>  | 1.33±1.00×10 <sup>1</sup> | 2.00±2.00×10 <sup>1</sup> |
|      |        |                   | Pigmented | 9.37±0.60×10 <sup>2</sup> | 9.77±1.10×10 <sup>3</sup> | 3.33±4.71×10 <sup>0</sup> | 3.33±5.00×10 <sup>0</sup> | 6.67±0.00×10 <sup>0</sup>  | 0                         | 2.00±2.00×10 <sup>1</sup> |
|      |        |                   | AAP       | 0                         | 0                         | 0                         | 0                         | 0                          | 0                         | 0                         |
|      |        | Potato            | Total     | 3.55±0.84×10 <sup>3</sup> | 8.73±1.35×10 <sup>3</sup> | 3.33±1.70×10 <sup>1</sup> | 2.33±0.50×10 <sup>1</sup> | 3.67±1.00×10 <sup>1</sup>  | 1.33±1.00×10 <sup>1</sup> | 1.49±0.01×10 <sup>3</sup> |
|      |        |                   | Pigmented | 2.89±0.71×10 <sup>3</sup> | 4.80±0.75×10 <sup>2</sup> | 0                         | 0                         | 3.33±5.00×10 <sup>0</sup>  | 0                         | 1.20±0.15×10 <sup>2</sup> |
|      |        |                   | AAP       | 0                         | 0                         | 0                         | 0                         | 0                          | 0                         | 0                         |
|      |        | BG-11             | Total     | 1.33±2.00×10 <sup>7</sup> | N/A                       | 9.00±4.20×10 <sup>2</sup> | 2.47±2.45×10 <sup>3</sup> | 1.77±1.00×10 <sup>2</sup>  | 8.67±1.50×10 <sup>1</sup> | 1.68±0.05×10 <sup>3</sup> |
|      |        |                   | AOP       | 2.77±0.25×10 <sup>2</sup> | 1.47±0.25×10 <sup>3</sup> | 0                         | 2.00±0.50×10 <sup>1</sup> | 0                          | 0                         | 0                         |
|      |        |                   | AAP       | 0                         | 0                         | 0                         | 0                         | 0                          | 0                         | 0                         |
|      |        | PNSm              | Total     | 6.53±0.35×10 <sup>2</sup> | 4.83±0.30×10 <sup>2</sup> | 0                         | 6.67±5.00×10 <sup>0</sup> | 6.67±5.00×10 <sup>0</sup>  | 0.67±1.00×10 <sup>1</sup> | 1.61±0.29×10 <sup>3</sup> |
|      |        |                   | AnAnP     | 0                         | 0                         | 0                         | 0                         | 0                          | 0                         | 0                         |
|      |        |                   | AAP       | 0                         | 0                         | 0                         | 0                         | 0                          | 0                         | 0                         |
|      | Fall   | RO                | Total     | 3.87±1.15×10 <sup>3</sup> | 2.27±0.10×10 <sup>4</sup> | 5.07±0.63×10 <sup>3</sup> | N/A                       | 1.18±0.06×10 <sup>4</sup>  | 2.34±0.06×10 <sup>3</sup> | N/A                       |
|      |        |                   | Pigmented | 1.33±0.10×10 <sup>3</sup> | 4.33±1.50×10 <sup>3</sup> | 4.03±0.69×10 <sup>3</sup> | N/A                       | 4.00±0.50×10 <sup>3</sup>  | 6.47±0.00×10 <sup>2</sup> | N/A                       |
|      |        |                   | AAP       | 1.98×10 <sup>2</sup>      | 0                         | 8.58×10 <sup>1</sup>      | N/A                       | 0                          | 0                         | N/A                       |
|      |        | OM                | Total     | 8.07±1.20×10 <sup>3</sup> | 7.53±0.00×10 <sup>4</sup> | 9.57±1.18×10 <sup>3</sup> | N/A                       | 5.73±0.90×10 <sup>4</sup>  | 1.05±0.17×10 <sup>4</sup> | N/A                       |
|      |        |                   | Pigmented | 2.03±0.15×10 <sup>3</sup> | 1.10±0.00×10 <sup>4</sup> | 3.00±2.41×10 <sup>3</sup> | N/A                       | 1.80±1.20×10 <sup>4</sup>  | 3.03±0.00×10 <sup>3</sup> | N/A                       |
|      |        |                   | AAP       | 0                         | 0                         | 0                         | N/A                       | 3.91×10 <sup>2</sup>       | 0                         | N/A                       |
|      |        | RO <sub>T</sub>   | Total     | 3.43±0.65×10 <sup>2</sup> | 2.68±0.51×10 <sup>3</sup> | 1.84±0.36×10 <sup>3</sup> | N/A                       | 2.33±0.50×10 <sup>1</sup>  | 3.33±1.50×10 <sup>1</sup> | N/A                       |
|      |        |                   | Pigmented | 3.30±0.65×10 <sup>2</sup> | 1.51±0.32×10 <sup>3</sup> | 1.84±0.36×10 <sup>3</sup> | N/A                       | 2.33±0.50×10 <sup>1</sup>  | 3.33±1.50×10 <sup>1</sup> | N/A                       |
|      |        |                   | AAP       | 0                         | 0                         | 0                         | N/A                       | 0                          | 0                         | N/A                       |
|      |        | Potato            | Total     | 2.03±0.25×10 <sup>3</sup> | 1.05±0.27×10 <sup>4</sup> | 3.60±0.29×10 <sup>3</sup> | N/A                       | 6.83±0.15×10 <sup>2</sup>  | 7.17±0.00×10 <sup>2</sup> | N/A                       |
|      |        |                   | Pigmented | 7.03±0.30×10 <sup>2</sup> | 1.47±0.35×10 <sup>3</sup> | 3.03±0.37×10 <sup>3</sup> | N/A                       | 8.67±2.00×10 <sup>1</sup>  | 2.83±0.40×10 <sup>2</sup> | N/A                       |
|      |        |                   | AAP       | 0                         | 0                         | 0                         | N/A                       | 6.19×10 <sup>0</sup>       | 0                         | N/A                       |
|      |        | BG-11             | Total     | 3.25±0.65×10 <sup>4</sup> | 2.02±0.22×10 <sup>5</sup> | 2.09±0.20×10 <sup>4</sup> | N/A                       | N/A                        | N/A                       | N/A                       |
|      |        |                   | AOP       | 1.87±0.35×10 <sup>3</sup> | 9.60±0.00×10 <sup>3</sup> | 1.67±0.47×10 <sup>1</sup> | N/A                       | 4.00±0.00×10 <sup>1</sup>  | 2.00±0.00×10 <sup>1</sup> | N/A                       |
|      |        |                   | AAP       | 0                         | 0                         | 0                         | N/A                       | 0                          | 0                         | N/A                       |
|      |        | PNSm              | Total     | 1.47±0.00×10 <sup>2</sup> | 2.54±0.13×10 <sup>3</sup> | 5.67±0.47×10 <sup>1</sup> | N/A                       | 2.00±0.50×10 <sup>1</sup>  | 1.00±1.00×10 <sup>1</sup> | N/A                       |
|      |        |                   | AnAnP     | 0                         | 3.33±5.00×10 <sup>0</sup> | 2.00±1.41×10 <sup>1</sup> | N/A                       | 0                          | 0                         | N/A                       |
|      |        |                   | AAP       | 0                         | 0                         | 0                         | 0                         | 0                          | 0                         | 0                         |
| 2019 | Winter | Alternative Sites | Total     | N/A                       | N/A                       | 3.83±0.80×10 <sup>2</sup> | 3.30±1.27×10 <sup>2</sup> | 5.10±0.10×10 <sup>2</sup>  | 3.00±0.40×10 <sup>2</sup> | 3.87±0.15×10 <sup>2</sup> |
|      |        |                   | Pigmented | N/A                       | N/A                       | 1.50±0.60×10 <sup>2</sup> | 1.37±0.97×10 <sup>2</sup> | 1.50±0.05×10 <sup>2</sup>  | 1.20±0.15×10 <sup>2</sup> | 1.47±0.05×10 <sup>2</sup> |
|      |        |                   | AAP       | N/A                       | N/A                       | 0                         | 0                         | 0                          | 0                         | 0                         |
|      |        | OM                | Total     | N/A                       | N/A                       | 4.90±0.20×10 <sup>2</sup> | 2.83±1.23×10 <sup>2</sup> | 6.27±0.75×10 <sup>2</sup>  | 2.10±0.05×10 <sup>2</sup> | 3.93±0.15×10 <sup>2</sup> |
|      |        |                   | Pigmented | N/A                       | N/A                       | 1.33±0.35×10 <sup>2</sup> | 2.00±1.63×10 <sup>1</sup> | 1.70±0.35×10 <sup>2</sup>  | 2.67±0.05×10 <sup>1</sup> | 8.67±1.00×10 <sup>1</sup> |
|      |        |                   | AAP       | N/A                       | N/A                       | 0                         | 0                         | 0                          | 0                         | 0                         |
|      |        | RO <sub>T</sub>   | Total     | N/A                       | N/A                       | 1.50±0.50×10 <sup>1</sup> | 0                         | 3.33±5.00×10 <sup>0</sup>  | 1.67±2.50×10 <sup>1</sup> | 3.33±5.00×10 <sup>0</sup> |
|      |        |                   | Pigmented | N/A                       | N/A                       | 1.50±0.50×10 <sup>1</sup> | 0                         | 3.33±5.00×10 <sup>0</sup>  | 0.66±1.00×10 <sup>1</sup> | 3.33±5.00×10 <sup>0</sup> |
|      |        |                   | AAP       | N/A                       | N/A                       | 0                         | 0                         | 0                          | 0                         | 0                         |
|      |        | Potato            | Total     | N/A                       | N/A                       | 3.20±1.20×10 <sup>2</sup> | 2.37±1.03×10 <sup>2</sup> | 3.90±0.20×10 <sup>2</sup>  | 1.27±0.20×10 <sup>2</sup> | 3.10±0.40×10 <sup>2</sup> |
|      |        |                   | Pigmented | N/A                       | N/A                       | 1.50±0.50×10 <sup>2</sup> | 1.27±0.56×10 <sup>2</sup> | 2.10±0.20×10 <sup>2</sup>  | 5.33±2.00×10 <sup>1</sup> | 1.80±0.00×10 <sup>2</sup> |
|      |        |                   | AAP       | N/A                       | N/A                       | 0                         | 0                         | 0                          | 0                         | 0                         |
|      |        | R2A               | Total     | N/A                       | N/A                       | N/A                       | 5.40±2.79×10 <sup>2</sup> | N/A                        | 5.40±0.90×10 <sup>2</sup> | N/A                       |
|      |        |                   | Pigmented | N/A                       | N/A                       | N/A                       | 2.50±1.10×10 <sup>2</sup> | N/A                        | 2.50±0.60×10 <sup>2</sup> | N/A                       |
|      |        |                   | AAP       | N/A                       | N/A                       | N/A                       | 0                         | N/A                        | 0                         | N/A                       |
|      |        | BG-11             | Total     | N/A                       | N/A                       | 4.63±0.10×10 <sup>2</sup> | 4.77±0.73×10 <sup>2</sup> | 5.97±0.25×10 <sup>2</sup>  | 2.08±0.79×10 <sup>3</sup> | 5.43±0.05×10 <sup>2</sup> |
|      |        |                   | AOP       | N/A                       | N/A                       | 0                         | 3.33±4.71×10 <sup>0</sup> | 0                          | 0                         | 0                         |
|      |        |                   | AAP       | N/A                       | N/A                       | 0                         | 0                         | 0                          | 0                         | 0                         |
|      |        | PNSm              | Total     | N/A                       | N/A                       | 0                         | 0                         | 0                          | 0                         | 0                         |
|      |        |                   | AnAnP     | N/A                       | N/A                       | 0                         | 0                         | 0                          | 0                         | 0                         |
|      |        |                   | AAP       | N/A                       | N/A                       | 0                         | 0                         | 0                          | 0                         | 0                         |

**Table S4. Continued (7/7).**

|           |                 |                 |                   | 5                         |                           | 6                         |                           | 7                         |                           | 8                         |                           | 9      |        | 10     |        |
|-----------|-----------------|-----------------|-------------------|---------------------------|---------------------------|---------------------------|---------------------------|---------------------------|---------------------------|---------------------------|---------------------------|--------|--------|--------|--------|
| Year      | Season          | Medium          |                   | liquid                    | sediment                  | liquid                    | liquid                    | liquid                    | liquid                    | liquid                    | liquid                    | liquid | liquid | liquid | liquid |
| 2019      | Spring          | RO              | Total             | 4.80±0.35×10 <sup>4</sup> | 9.33±0.30×10 <sup>3</sup> | 1.51±0.07×10 <sup>5</sup> | 7.60±0.45×10 <sup>3</sup> | 3.56±1.28×10 <sup>3</sup> | 9.77±1.60×10 <sup>3</sup> | 5.87±0.05×10 <sup>2</sup> |                           |        |        |        |        |
|           |                 |                 | Pigmented         | 1.17±0.20×10 <sup>4</sup> | 2.70±0.50×10 <sup>3</sup> | 1.29±0.20×10 <sup>5</sup> | 7.27±0.40×10 <sup>3</sup> | 2.81±0.87×10 <sup>3</sup> | 4.47±0.25×10 <sup>3</sup> | 4.30±0.85×10 <sup>2</sup> |                           |        |        |        |        |
|           |                 |                 | AAP               | 7.07×10 <sup>2</sup>      | 0                         | 2.52×10 <sup>3</sup>      | 8.38×10 <sup>2</sup>      | 1.59×10 <sup>2</sup>      | 5.32×10 <sup>2</sup>      | 1.72×10 <sup>1</sup>      |                           |        |        |        |        |
|           |                 | OM              | Total             | 7.73±0.25×10 <sup>4</sup> | 3.53±0.50×10 <sup>4</sup> | 2.30±0.78×10 <sup>4</sup> | 1.16±0.04×10 <sup>4</sup> | 2.14±0.08×10 <sup>4</sup> | 1.18±0.16×10 <sup>4</sup> | 5.13±0.65×10 <sup>3</sup> |                           |        |        |        |        |
|           |                 |                 | Pigmented         | 4.00±2.50×10 <sup>3</sup> | 7.67±3.00×10 <sup>3</sup> | 1.23±0.39×10 <sup>4</sup> | 8.20±0.50×10 <sup>3</sup> | 9.70±0.60×10 <sup>3</sup> | 3.80±0.45×10 <sup>3</sup> | 6.60±0.10×10 <sup>2</sup> |                           |        |        |        |        |
|           |                 |                 | AAP               | 2.22×10 <sup>2</sup>      | 1.21×10 <sup>3</sup>      | 0                         | 5.13×10 <sup>2</sup>      | 1.01×10 <sup>3</sup>      | 7.04×10 <sup>2</sup>      | 0                         |                           |        |        |        |        |
|           |                 | RO <sub>T</sub> | Total             | 2.20±0.25×10 <sup>3</sup> | 1.79±0.20×10 <sup>3</sup> | 6.07±0.29×10 <sup>3</sup> | 2.24±0.16×10 <sup>3</sup> | 1.97±0.25×10 <sup>3</sup> | 9.03±0.05×10 <sup>2</sup> | 8.67±2.00×10 <sup>1</sup> |                           |        |        |        |        |
|           |                 |                 | Pigmented         | 2.13±0.18×10 <sup>3</sup> | 1.58±0.42×10 <sup>3</sup> | 6.07±0.29×10 <sup>3</sup> | 2.20±0.13×10 <sup>3</sup> | 1.93±0.26×10 <sup>3</sup> | 8.47±0.00×10 <sup>2</sup> | 8.67±2.00×10 <sup>1</sup> |                           |        |        |        |        |
|           |                 |                 | AAP               | 0                         | 5.91×10 <sup>2</sup>      | 0                         | 0                         | 0                         | 0                         | 0                         |                           |        |        |        |        |
|           |                 | Potato          | Total             | 2.93±0.85×10 <sup>4</sup> | 5.37±0.05×10 <sup>3</sup> | 1.00±0.13×10 <sup>4</sup> | 3.67±0.25×10 <sup>3</sup> | 1.00±0.00×10 <sup>4</sup> | 2.13±0.03×10 <sup>3</sup> | 1.21±0.13×10 <sup>3</sup> |                           |        |        |        |        |
|           |                 |                 | Pigmented         | 1.30±0.45×10 <sup>4</sup> | 1.73±0.20×10 <sup>3</sup> | 8.77±0.87×10 <sup>3</sup> | 3.43±0.30×10 <sup>3</sup> | 1.00±0.00×10 <sup>4</sup> | 6.33±9.50×10 <sup>2</sup> | 7.80±1.45×10 <sup>2</sup> |                           |        |        |        |        |
|           |                 |                 | AAP               | 7.65×10 <sup>2</sup>      | 3.47×10 <sup>2</sup>      | 1.95×10 <sup>3</sup>      | 4.29×10 <sup>2</sup>      | 0                         | 3.17×10 <sup>1</sup>      | 4.88×10 <sup>1</sup>      |                           |        |        |        |        |
|           |                 | R2A             | Total             | 8.40±2.45×10 <sup>4</sup> | 3.67±0.25×10 <sup>4</sup> | 1.91±0.10×10 <sup>4</sup> | N/A                       | 1.49±0.01×10 <sup>4</sup> | 1.11±0.07×10 <sup>4</sup> | 6.50±1.05×10 <sup>3</sup> |                           |        |        |        |        |
|           |                 |                 | Pigmented         | 2.33±0.70×10 <sup>4</sup> | 1.30±0.20×10 <sup>4</sup> | 9.13±6.46×10 <sup>3</sup> | N/A                       | 8.40±0.50×10 <sup>3</sup> | 5.43±0.20×10 <sup>3</sup> | 2.80±0.45×10 <sup>3</sup> |                           |        |        |        |        |
|           |                 |                 | AAP               | 0                         | 3.36×10 <sup>3</sup>      | 4.35×10 <sup>2</sup>      | N/A                       | 1.80×10 <sup>3</sup>      | 0                         | 1.08×10 <sup>2</sup>      |                           |        |        |        |        |
|           |                 | BG-11           | Total             | 8.33±0.85×10 <sup>4</sup> | 3.09±0.44×10 <sup>4</sup> | 1.78±0.26×10 <sup>4</sup> | 5.35±0.00×10 <sup>4</sup> | 1.78±0.07×10 <sup>4</sup> | 1.29±0.26×10 <sup>4</sup> | 2.41±0.45×10 <sup>4</sup> |                           |        |        |        |        |
|           |                 |                 | AOP               | 0                         | 3.33±5.00×10 <sup>0</sup> | 1.33±1.25×10 <sup>1</sup> | 0                         | 0                         | 6.67±1.00×10 <sup>1</sup> | 0                         |                           |        |        |        |        |
|           |                 |                 | PNSm              | 9.37±0.25×10 <sup>3</sup> | 1.05±0.01×10 <sup>4</sup> | 1.33±1.25×10 <sup>1</sup> | 2.33±2.00×10 <sup>1</sup> | 3.33±0.00×10 <sup>0</sup> | 1.33±0.05×10 <sup>1</sup> | 0.67±1.00×10 <sup>1</sup> |                           |        |        |        |        |
|           |                 | AnAnP           | Total             | 0                         | 0                         | 0                         | 0                         | 0                         | 0                         | 0                         |                           |        |        |        |        |
|           |                 |                 | Pigmented         | 0                         | 0                         | 0                         | 0                         | 0                         | 0                         | 0                         |                           |        |        |        |        |
|           |                 |                 | AAP               | 0                         | 0                         | 0                         | 0                         | 0                         | 0                         | 0                         |                           |        |        |        |        |
|           | Summer          | RO              | Total             | 7.40±0.10×10 <sup>2</sup> | 5.45±0.00×10 <sup>5</sup> | 2.85±0.06×10 <sup>3</sup> | 2.83±0.03×10 <sup>3</sup> | 2.63±0.25×10 <sup>3</sup> | 3.24±1.07×10 <sup>3</sup> | 7.77±1.05×10 <sup>3</sup> |                           |        |        |        |        |
|           |                 |                 | Pigmented         | 1.13±0.20×10 <sup>2</sup> | 1.30±0.00×10 <sup>5</sup> | 1.23±0.06×10 <sup>3</sup> | 1.08±0.14×10 <sup>3</sup> | 8.33±2.50×10 <sup>2</sup> | 6.47±1.30×10 <sup>2</sup> | 4.13±0.20×10 <sup>3</sup> |                           |        |        |        |        |
|           |                 |                 | AAP               | 0                         | 1.34×10 <sup>4</sup>      | 0                         | 0                         | 0                         | 0                         | 1.80×10 <sup>2</sup>      |                           |        |        |        |        |
|           |                 | OM              | Total             | 1.85±0.00×10 <sup>3</sup> | 6.10±1.85×10 <sup>5</sup> | 4.50±0.80×10 <sup>3</sup> | 5.33±0.75×10 <sup>3</sup> | 1.83±0.18×10 <sup>4</sup> | 5.30±0.45×10 <sup>3</sup> | 1.41±0.00×10 <sup>4</sup> |                           |        |        |        |        |
|           |                 |                 | Pigmented         | 2.10±0.00×10 <sup>2</sup> | 8.00±1.00×10 <sup>4</sup> | 2.33±1.25×10 <sup>2</sup> | 2.67±0.00×10 <sup>2</sup> | 2.20±0.05×10 <sup>3</sup> | 1.77±0.00×10 <sup>3</sup> | 1.65±0.00×10 <sup>3</sup> |                           |        |        |        |        |
|           |                 |                 | AAP               | 0                         | 3.08×10 <sup>3</sup>      | 8.33×10 <sup>0</sup>      | 9.52×10 <sup>0</sup>      | 0                         | 0                         | 1.10×10 <sup>2</sup>      |                           |        |        |        |        |
|           |                 | RO <sub>T</sub> | Total             | 4.00±0.50×10 <sup>1</sup> | 3.77±1.20×10 <sup>4</sup> | 3.50±1.61×10 <sup>2</sup> | 7.33±5.00×10 <sup>1</sup> | 4.33±1.00×10 <sup>1</sup> | 1.00±0.10×10 <sup>2</sup> | 3.00±0.50×10 <sup>1</sup> |                           |        |        |        |        |
|           |                 |                 | Pigmented         | 3.33±0.00×10 <sup>1</sup> | 3.60±1.05×10 <sup>4</sup> | 3.50±1.61×10 <sup>2</sup> | 7.33±5.00×10 <sup>1</sup> | 4.33±1.00×10 <sup>1</sup> | 1.00±0.10×10 <sup>2</sup> | 3.00±0.50×10 <sup>1</sup> |                           |        |        |        |        |
|           |                 |                 | AAP               | 4.76×10 <sup>0</sup>      | 7.20×10 <sup>3</sup>      | 7.00×10 <sup>1</sup>      | 1.47×10 <sup>1</sup>      | 7.88×10 <sup>0</sup>      | 0                         | 0                         |                           |        |        |        |        |
|           |                 | Potato          | Total             | 4.07±0.75×10 <sup>2</sup> | 4.23±0.30×10 <sup>4</sup> | 9.60±0.78×10 <sup>3</sup> | 1.35±0.06×10 <sup>3</sup> | 7.07±0.35×10 <sup>3</sup> | 8.00±0.00×10 <sup>3</sup> | 2.40±0.00×10 <sup>3</sup> |                           |        |        |        |        |
|           |                 |                 | Pigmented         | 9.67±0.50×10 <sup>1</sup> | 1.77±0.10×10 <sup>4</sup> | 2.03±0.24×10 <sup>3</sup> | 8.13±0.25×10 <sup>2</sup> | 3.33±0.15×10 <sup>3</sup> | 1.20±0.00×10 <sup>3</sup> | 1.91±0.00×10 <sup>3</sup> |                           |        |        |        |        |
|           |                 |                 | AAP               | 1.76×10 <sup>1</sup>      | 2.52×10 <sup>3</sup>      | 1.45×10 <sup>2</sup>      | 4.78×10 <sup>1</sup>      | 1.52×10 <sup>2</sup>      | 0                         | 1.12×10 <sup>2</sup>      |                           |        |        |        |        |
|           |                 | R2A             | Total             | 1.54±0.36×10 <sup>3</sup> | 1.90±0.29×10 <sup>5</sup> | 1.45±0.12×10 <sup>3</sup> | 1.86±0.08×10 <sup>3</sup> | 5.43±0.90×10 <sup>3</sup> | 1.10±0.26×10 <sup>4</sup> | 5.57±1.20×10 <sup>3</sup> |                           |        |        |        |        |
|           |                 |                 | Pigmented         | 2.27±0.30×10 <sup>2</sup> | 2.57±0.25×10 <sup>4</sup> | 7.67±0.63×10 <sup>2</sup> | 7.53±0.20×10 <sup>2</sup> | 1.53±0.20×10 <sup>3</sup> | 1.47±0.30×10 <sup>3</sup> | 2.77±0.30×10 <sup>3</sup> |                           |        |        |        |        |
|           |                 |                 | AAP               | 0                         | 2.14×10 <sup>3</sup>      | 3.65×10 <sup>1</sup>      | 3.42×10 <sup>1</sup>      | 1.92×10 <sup>2</sup>      | 0                         | 3.95×10 <sup>2</sup>      |                           |        |        |        |        |
|           |                 | BG-11           | Total             | 3.07±0.10×10 <sup>4</sup> | 1.22±0.01×10 <sup>6</sup> | 7.73±0.46×10 <sup>3</sup> | 4.53±0.05×10 <sup>3</sup> | 5.43±1.85×10 <sup>3</sup> | 1.22±0.71×10 <sup>4</sup> | 6.23±0.10×10 <sup>3</sup> |                           |        |        |        |        |
|           |                 |                 | AOP               | 1.27±0.13×10 <sup>3</sup> | 2.97±0.03×10 <sup>3</sup> | 1.67±0.47×10 <sup>1</sup> | 2.33±0.50×10 <sup>1</sup> | 6.33±2.50×10 <sup>1</sup> | 5.37±1.55×10 <sup>2</sup> | 2.40±1.20×10 <sup>2</sup> |                           |        |        |        |        |
|           |                 |                 | PNSm              | 4.53±0.10×10 <sup>3</sup> | 1.12±0.06×10 <sup>4</sup> | 8.87±2.19×10 <sup>2</sup> | 1.23±0.15×10 <sup>3</sup> | 3.33±0.00×10 <sup>1</sup> | 7.90±0.10×10 <sup>2</sup> | 3.67±1.50×10 <sup>1</sup> |                           |        |        |        |        |
|           |                 | AnAnP           | Total             | 7.33±2.00×10 <sup>2</sup> | 0                         | 7.67±2.96×10 <sup>2</sup> | 5.40±0.40×10 <sup>2</sup> | 0                         | 0                         | 0                         |                           |        |        |        |        |
|           |                 |                 | Pigmented         | 2.06±0.11×10 <sup>4</sup> | 1.72±0.47×10 <sup>5</sup> | 1.47±0.03×10 <sup>4</sup> | 1.78±0.07×10 <sup>3</sup> | 1.66±0.14×10 <sup>4</sup> | 5.80±1.70×10 <sup>3</sup> | 6.13±0.35×10 <sup>4</sup> |                           |        |        |        |        |
|           |                 |                 | AAP               | 4.17±0.35×10 <sup>3</sup> | 5.53±0.80×10 <sup>4</sup> | 1.03±0.05×10 <sup>4</sup> | 9.47±0.40×10 <sup>2</sup> | 8.57±1.40×10 <sup>3</sup> | 3.00±0.60×10 <sup>3</sup> | 1.27±0.95×10 <sup>4</sup> |                           |        |        |        |        |
|           | Fall            | OM              | Total             | 5.73±0.15×10 <sup>4</sup> | 9.07±0.50×10 <sup>5</sup> | 1.80±0.10×10 <sup>4</sup> | 7.97±3.50×10 <sup>3</sup> | 1.62±0.33×10 <sup>4</sup> | 9.17±0.15×10 <sup>3</sup> | 4.70±3.80×10 <sup>4</sup> |                           |        |        |        |        |
|           |                 |                 | Pigmented         | 7.00±1.00×10 <sup>3</sup> | 1.17±0.05×10 <sup>5</sup> | 1.25±0.15×10 <sup>4</sup> | 1.57±0.15×10 <sup>3</sup> | 5.60±1.20×10 <sup>3</sup> | 2.43±0.15×10 <sup>3</sup> | 7.33±3.50×10 <sup>3</sup> |                           |        |        |        |        |
|           |                 |                 | AAP               | 0                         | 5.83×10 <sup>3</sup>      | 2.27×10 <sup>2</sup>      | 0                         | 0                         | 0                         | 8.84×10 <sup>1</sup>      |                           |        |        |        |        |
|           |                 | RO <sub>T</sub> | Total             | 3.23±0.65×10 <sup>3</sup> | 5.03±0.80×10 <sup>4</sup> | 2.60±1.10×10 <sup>3</sup> | 3.73±0.25×10 <sup>2</sup> | 2.47±0.40×10 <sup>2</sup> | 1.13±0.71×10 <sup>3</sup> | 7.07±0.85×10 <sup>2</sup> |                           |        |        |        |        |
|           |                 |                 | Pigmented         | 3.00±0.60×10 <sup>3</sup> | 4.97±0.70×10 <sup>4</sup> | 2.60±1.10×10 <sup>3</sup> | 3.63±0.15×10 <sup>2</sup> | 2.40±0.35×10 <sup>2</sup> | 1.11±0.73×10 <sup>3</sup> | 7.07±0.85×10 <sup>2</sup> |                           |        |        |        |        |
|           |                 |                 | AAP               | 9.23×10 <sup>2</sup>      | 0                         | 0                         | 0                         | 1.26×10 <sup>1</sup>      | 0                         | 1.09×10 <sup>2</sup>      |                           |        |        |        |        |
|           |                 | Potato          | Total             | 5.73±2.65×10 <sup>3</sup> | 5.57±0.85×10 <sup>4</sup> | 1.43±0.07×10 <sup>4</sup> | 1.44±0.12×10 <sup>3</sup> | 8.47±0.65×10 <sup>2</sup> | 2.30±0.21×10 <sup>3</sup> | 3.90±0.50×10 <sup>3</sup> |                           |        |        |        |        |
|           |                 |                 | Pigmented         | 2.47±0.20×10 <sup>3</sup> | 1.83±0.55×10 <sup>4</sup> | 1.03±0.08×10 <sup>4</sup> | 8.47±0.50×10 <sup>2</sup> | 5.00±0.90×10 <sup>2</sup> | 1.17±0.32×10 <sup>3</sup> | 1.60±0.25×10 <sup>3</sup> |                           |        |        |        |        |
|           |                 |                 | AAP               | 0                         | 2.62×10 <sup>3</sup>      | 0                         | 8.06×10 <sup>1</sup>      | 0                         | 0                         | 0                         |                           |        |        |        |        |
|           |                 | R2A             | Total             | 1.60±0.15×10 <sup>4</sup> | 2.25±0.22×10 <sup>5</sup> | 2.60±1.10×10 <sup>3</sup> | 8.20±0.15×10 <sup>3</sup> | 7.63±0.70×10 <sup>3</sup> | 4.43±0.50×10 <sup>3</sup> | 1.61±0.30×10 <sup>4</sup> |                           |        |        |        |        |
|           |                 |                 | Pigmented         | 2.97±1.25×10 <sup>3</sup> | 6.03±1.05×10 <sup>4</sup> | 2.60±1.10×10 <sup>3</sup> | 1.63±0.10×10 <sup>3</sup> | 1.93±0.10×10 <sup>3</sup> | 2.23±0.50×10 <sup>3</sup> | 2.23±0.85×10 <sup>3</sup> |                           |        |        |        |        |
|           |                 |                 | AAP               | 0                         | 1.51×10 <sup>4</sup>      | 1.04×10 <sup>2</sup>      | 0                         | 0                         | 0                         | 9.71×10 <sup>1</sup>      |                           |        |        |        |        |
|           |                 | BG-11           | Total             | 7.33±1.35×10 <sup>4</sup> | 9.67±1.60×10 <sup>5</sup> | 4.23±0.13×10 <sup>4</sup> | 5.37±1.90×10 <sup>2</sup> | 1.86±0.10×10 <sup>4</sup> | 2.17±0.15×10 <sup>4</sup> | 6.57±5.00×10 <sup>4</sup> |                           |        |        |        |        |
|           |                 |                 | AOP               | 1.10±0.30×10 <sup>2</sup> | 4.50±0.00×10 <sup>3</sup> | 0                         | 0                         | 6.67±0.00×10 <sup>0</sup> | 8.67±0.50×10 <sup>1</sup> | 2.33±0.40×10 <sup>2</sup> |                           |        |        |        |        |
|           |                 |                 | PNSm              | 3.17±0.15×10 <sup>2</sup> | 4.63±1.33×10 <sup>3</sup> | 1.47±0.41×10 <sup>2</sup> | 6.33±4.50×10 <sup>1</sup> | 3.33±5.00×10 <sup>0</sup> | 1.33±1.00×10 <sup>1</sup> | 2.67±0.50×10 <sup>1</sup> |                           |        |        |        |        |
|           |                 | AnAnP           | Total             | 0                         | 0                         | 0                         | 0                         | 0                         | 0                         | 0                         |                           |        |        |        |        |
| Pigmented |                 |                 | 0                 | 0                         | 0                         | 0                         | 0                         | 0                         | 0                         |                           |                           |        |        |        |        |
| AAP       |                 |                 | 0                 | 0                         | 0                         | 0                         | 0                         | 0                         | 0                         |                           |                           |        |        |        |        |
| 2020      |                 | Winter          | Alternative Sites | Total                     | N/A                       | N/A                       | W10                       | W1                        | W9                        | W6                        | W8                        |        |        |        |        |
|           |                 |                 |                   | Pigmented                 | N/A                       | N/A                       | 8.67±1.00×10 <sup>1</sup> | 1.93±0.31×10 <sup>2</sup> | 2.33±1.00×10 <sup>1</sup> | 1.20±0.05×10 <sup>2</sup> | 9.67±2.00×10 <sup>1</sup> |        |        |        |        |
|           |                 |                 |                   | AAP                       | N/A                       | N/A                       | 0                         | 5.00±2.16×10 <sup>1</sup> | 1.33±1.00×10 <sup>1</sup> | 3.33±1.50×10 <sup>1</sup> | 2.33±0.00×10 <sup>1</sup> |        |        |        |        |
|           | OM              |                 | Total             | N/A                       | N/A                       | 6.53±0.35×10 <sup>2</sup> | 7.00±0.00×10 <sup>1</sup> | 6.00±0.00×10 <sup>1</sup> | 2.70±0.55×10 <sup>2</sup> | 3.00±0.50×10 <sup>1</sup> |                           |        |        |        |        |
|           |                 |                 | Pigmented         | N/A                       | N/A                       | 0                         | 2.33±1.70×10 <sup>1</sup> | 0                         | 2.67±2.50×10 <sup>1</sup> | 0                         |                           |        |        |        |        |
|           |                 |                 | AAP               | N/A                       | N/A                       | 0                         | 0                         | 0                         | 0                         | 0                         |                           |        |        |        |        |
|           | RO <sub>T</sub> |                 | Total             | N/A                       | N/A                       | 6.67±0.00×10 <sup>0</sup> | 6.33±1.25×10 <sup>1</sup> | 4.00±1.00×10 <sup>1</sup> | 0                         | 1.00±0.50×10 <sup>1</sup> |                           |        |        |        |        |
|           |                 |                 | Pigmented         | N/A                       | N/A                       | 0                         | 6.67±4.71×10 <sup>0</sup> | 0                         | 3.00±1.00×10 <sup>1</sup> | 1.00±0.50×10 <sup>1</sup> |                           |        |        |        |        |
|           |                 |                 | AAP               | N/A                       | N/A                       | 0                         | 0                         | 0                         | 0                         | 0                         |                           |        |        |        |        |
|           | Potato          |                 | Total             | N/A                       | N/A                       | 6.67±0.00×10 <sup>0</sup> | 6.00±1.41×10 <sup>1</sup> | 0                         | 3.00±1.50×10 <sup>1</sup> | 2.33±1.00×10 <sup>1</sup> |                           |        |        |        |        |
|           |                 |                 | Pigmented         | N/A                       | N/A                       | 0                         | 1.00±0.82×10 <sup>1</sup> | 0                         | 3.33±0.00×10 <sup>0</sup> | 0                         |                           |        |        |        |        |
|           |                 |                 | AAP               | N/A                       | N/A                       | 0                         | 0                         | 0                         | 0                         | 0                         |                           |        |        |        |        |
|           | R2A             |                 | Total             | N/A                       | N/A                       | 2.90±1.10×10 <sup>2</sup> | 5.90±0.71×10 <sup>2</sup> | 1.27±0.20×10 <sup>2</sup> | 5.67±2.5×10 <sup>1</sup>  | 1.27±0.05×10 <sup>2</sup> |                           |        |        |        |        |
|           |                 |                 | Pigmented         | N/A                       | N/A                       | 5.67±2.00×10 <sup>1</sup> | 0                         | 3.67±1.00×10 <sup>1</sup> | 6.67±0.00×10 <sup>0</sup> | 2.00±1.00×10 <sup>1</sup> |                           |        |        |        |        |
|           |                 |                 | AAP               | N/A                       | N/A                       | 0                         | 0                         | 0                         | 0                         | 1.13×10 <sup>1</sup>      |                           |        |        |        |        |
|           | BG-11           |                 | Total             | N/A                       | N/A                       | 1.28±0.31×10 <sup>3</sup> | 2.70±0.29×10 <sup>2</sup> | 4.17±0.55×10 <sup>2</sup> | 4.00±0.00×10 <sup>1</sup> | 6.00±3.00×10 <sup>1</sup> |                           |        |        |        |        |
|           |                 |                 | AOP               | N/A                       | N/A                       | 1.33±0.50×10 <sup>1</sup> | 3.67±2.49×10 <sup>1</sup> | 0                         | 3.33±5.00×10 <sup>0</sup> | 0                         |                           |        |        |        |        |
| PNSm      |                 | Total           | N/A               | N/A                       | 0                         | 0                         | 6.00±0.00×10 <sup>1</sup> | 0                         | 0                         |                           |                           |        |        |        |        |
| AnAnP     | Total           | N/A             | N/A               | 0                         | 0                         | 0                         | 0                         | 0                         |                           |                           |                           |        |        |        |        |
|           | Pigmented       | N/A             | N/A               | 0                         | 0                         | 0                         | 0                         | 0                         |                           |                           |                           |        |        |        |        |
|           | AAP             | N/A             | N/A               | 0                         | 0                         | 0                         | 0                         | 0                         |                           |                           |                           |        |        |        |        |

**Table S5. AAP type species used as reference for eDNA 16S V4 rRNA gene analysis.**

| Phylum           | Class                    | Order            | Family              | Genus               | Species           | Reference |
|------------------|--------------------------|------------------|---------------------|---------------------|-------------------|-----------|
| Proteobacteria   | $\alpha$ -Proteobacteria | Sphingomonadales | Erythromonadaceae   | Erythrobacter       | litoralis         | [17]      |
| Proteobacteria   | $\alpha$ -Proteobacteria | Sphingomonadales | Erythromonadaceae   | Erythromicrobium    | ramosum           | [17]      |
| Proteobacteria   | $\alpha$ -Proteobacteria | Sphingomonadales | Erythromonadaceae   | Porphyrobacter      | sanguineus        | [17]      |
| Proteobacteria   | $\alpha$ -Proteobacteria | Sphingomonadales | Sphingomonadaceae   | Blastomonas         | ursincola         | [17]      |
| Proteobacteria   | $\alpha$ -Proteobacteria | Sphingomonadales | Sphingomonadaceae   | Sphingomonas        | kaistensis        | [71]      |
| Proteobacteria   | $\alpha$ -Proteobacteria | Sphingomonadales | Sphingomonadaceae   | Citromicrobium      | bathymarinum      | [70]      |
| Proteobacteria   | $\alpha$ -Proteobacteria | Sphingomonadales | Sphingomonadaceae   | Citrimicrobium      | luteum            | [18]      |
| Proteobacteria   | $\alpha$ -Proteobacteria | Sphingomonadales | Sphingosinellaceae  | Sandaracinobacter   | sibiricus         | [17]      |
| Proteobacteria   | $\alpha$ -Proteobacteria | Sphingomonadales | Sphingosinellaceae  | Sandarakinorhabdus  | limnophila        | [71]      |
| Proteobacteria   | $\alpha$ -Proteobacteria | Rhodobacterales  | Rhodobacteraceae    | Roseobacter         | denitrificans     | [17]      |
| Proteobacteria   | $\alpha$ -Proteobacteria | Rhodobacterales  | Rhodobacteraceae    | Roseovarius         | tolerans          | [70]      |
| Proteobacteria   | $\alpha$ -Proteobacteria | Rhodobacterales  | Rhodobacteraceae    | Roseibium           | denhamense        | [70]      |
| Proteobacteria   | $\alpha$ -Proteobacteria | Rhodobacterales  | Rhodobacteraceae    | Rubrimonas          | cliftonensis      | [70]      |
| Proteobacteria   | $\alpha$ -Proteobacteria | Rhodobacterales  | Rhodobacteraceae    | Roseivivax          | halodurans        | [70]      |
| Proteobacteria   | $\alpha$ -Proteobacteria | Rhodobacterales  | Rhodobacteraceae    | Sulfitobacter       | guttiformis       | [70]      |
| Proteobacteria   | $\alpha$ -Proteobacteria | Rhodobacterales  | Rhodobacteraceae    | Roseinatronobacter  | thiooxidans       | [70]      |
| Proteobacteria   | $\alpha$ -Proteobacteria | Rhodobacterales  | Rhodobacteraceae    | Roseicyclus         | mahoneyensis      | [71]      |
| Proteobacteria   | $\alpha$ -Proteobacteria | Rhodobacterales  | Rhodobacteraceae    | Thalassobacter      | stenotrophicus    | [71]      |
| Proteobacteria   | $\alpha$ -Proteobacteria | Rhodobacterales  | Rhodobacteraceae    | Dinoroseobacter     | shibae            | [71]      |
| Proteobacteria   | $\alpha$ -Proteobacteria | Rhodobacterales  | Rhodobacteraceae    | Roseibacterium      | elongatum         | [71]      |
| Proteobacteria   | $\alpha$ -Proteobacteria | Rhodobacterales  | Rhodobacteraceae    | Roseisalinus        | antarcticus       | [71]      |
| Proteobacteria   | $\alpha$ -Proteobacteria | Rhodobacterales  | Rhodobacteraceae    | Labrenzia           | alexandrii        | [71]      |
| Proteobacteria   | $\alpha$ -Proteobacteria | Rhodobacterales  | Rhodobacteraceae    | Roseibaca           | ekhonensis        | [72]      |
| Proteobacteria   | $\alpha$ -Proteobacteria | Rhodobacterales  | Rhodobacteraceae    | Roseicitereum       | antarcticum       | [72]      |
| Proteobacteria   | $\alpha$ -Proteobacteria | Rhodobacterales  | Rhodobacteraceae    | Charonimicrobium    | ambiphotophilum   | [72]      |
| Proteobacteria   | $\alpha$ -Proteobacteria | Rhodobacterales  | Rhodobacteraceae    | Roseibacula         | alcaliphilum      | [18]      |
| Proteobacteria   | $\alpha$ -Proteobacteria | Rhodospirillales | Acetobacteraceae    | Roseococcus         | thiosulfatophilus | [17]      |
| Proteobacteria   | $\alpha$ -Proteobacteria | Rhodospirillales | Acetobacteraceae    | Acidiphilium        | rubrum            | [17]      |
| Proteobacteria   | $\alpha$ -Proteobacteria | Rhodospirillales | Acetobacteraceae    | Acidishaera         | rubrifaciens      | [70]      |
| Proteobacteria   | $\alpha$ -Proteobacteria | Rhodospirillales | Acetobacteraceae    | Rubritepida         | flocculans        | [70]      |
| Proteobacteria   | $\alpha$ -Proteobacteria | Rhodospirillales | Acetobacteraceae    | Craurococcus        | roseus            | [70]      |
| Proteobacteria   | $\alpha$ -Proteobacteria | Rhodospirillales | Acetobacteraceae    | Paracraurococcus    | ruber             | [70]      |
| Proteobacteria   | $\alpha$ -Proteobacteria | Rhodospirillales | Acetobacteraceae    | Geminicoccus        | roseus            | [71]      |
| Proteobacteria   | $\alpha$ -Proteobacteria | Rhodospirillales | Acetobacteraceae    | Humitalea           | rosea             | [18]      |
| Proteobacteria   | $\alpha$ -Proteobacteria | Rhodospirillales | Acetobacteraceae    | Roseomonas          | aestuarii         | [72]      |
| Proteobacteria   | $\alpha$ -Proteobacteria | Caulobacterales  | Maricaulaceae       | Alkalicaulis        | satelles          | [68]      |
| Proteobacteria   | $\alpha$ -Proteobacteria | Caulobacterales  | Maricaulaceae       | Photocaulis         | sulfatitolerans   | [68]      |
| Proteobacteria   | $\alpha$ -Proteobacteria | Rhodospirillales | Rhodospirillaceae   | Aerophototrophica   | crusticola        | [74]      |
| Proteobacteria   | $\alpha$ -Proteobacteria | Hyphomicrobiales | Phyllobacteriaceae  | Hoeflea             | phototrophica     | [71]      |
| Proteobacteria   | $\alpha$ -Proteobacteria | Hyphomicrobiales | Methylobacteriaceae | Methylorubrum       | extorquens        | [73]      |
| Proteobacteria   | $\beta$ -Proteobacteria  | Burkholderiales  | Comamonadaceae      | Limnohabitans       | planktonicus      | [63]      |
| Proteobacteria   | $\beta$ -Proteobacteria  | Burkholderiales  | Comamonadaceae      | Roseateles          | depolymerans      | [70]      |
| Proteobacteria   | $\beta$ -Proteobacteria  | Rhodocyclales    | Rhodocyclaceae      | Aquicola            | tertiaricarbonis  | [20]      |
| Proteobacteria   | $\gamma$ -Proteobacteria | Cellvibrionales  | Halieaceae          | Congregibacter      | litoralis         | [72]      |
| Proteobacteria   | $\gamma$ -Proteobacteria | Cellvibrionales  | Halieaceae          | Chromocurvus        | halotolerans      | [72]      |
| Gemmatimonadetes | Gemmatimonadetes         | Gemmatimonales   | Gemmatimonaceae     | Gemmatimonas        | phototrophica     | [20]      |
| Acidobacteriota  | "Acidobacteria"          | Acidobacteriales | Acidobacteriaceae   | Chloracidobacterium | thermophilum      | [69]      |

**Table S6. AnAnP type species used as reference for eDNA 16S V4 rRNA gene analysis.**

| Phylum         | Class                    | Order            | Family                 | Genus              | Species           | Reference |
|----------------|--------------------------|------------------|------------------------|--------------------|-------------------|-----------|
| Chloroflexi    | Chloroflexia             | Chloroflexales   | Chloroflexiaceae       | Chloroflexus       | aurantiacus       | [75]      |
| Chloroflexi    | Chloroflexia             | Chloroflexales   | Chloroflexiaceae       | Oscillochloris     | trichoides        | [75]      |
| Chloroflexi    | Chloroflexia             | Chloroflexales   | Chloroflexiaceae       | Chloroploca        | asiatica          | [75]      |
| Chloroflexi    | Chloroflexia             | Chloroflexales   | Roseiflexiaceae        | Roseiflexus        | castenholzii      | [75]      |
| Chloroflexi    | Chloroflexia             | Chloroflexales   | Kouleothrichinae       | Kouleothrix        | aurantiaca        | [75]      |
| Firmicutes     | Clostridia               | Eubacteriales    | Hellobacteriaceae      | Hellobacterium     | chlorum           | [77]      |
| Firmicutes     | Clostridia               | Eubacteriales    | Hellobacteriaceae      | Heliomicrobium     | gestii            | [77]      |
| Firmicutes     | Clostridia               | Eubacteriales    | Hellobacteriaceae      | Heliophilum        | fasciatum         | [77]      |
| Firmicutes     | Clostridia               | Eubacteriales    | Hellobacteriaceae      | Heliorestis        | daurensis         | [77]      |
| Chlorobiota    | Chlorobia                | Chlorobiales     | Chlorobiaceae          | Ancalochloris      | perfilievii       | [78]      |
| Chlorobiota    | Chlorobia                | Chlorobiales     | Chlorobiaceae          | Chlorobaculum      | tepidum           | [78]      |
| Chlorobiota    | Chlorobia                | Chlorobiales     | Chlorobiaceae          | Chlorobium         | limicola          | [78]      |
| Chlorobiota    | Chlorobia                | Chlorobiales     | Chlorobiaceae          | Chloroherpeton     | thalassium        | [78]      |
| Chlorobiota    | Chlorobia                | Chlorobiales     | Chlorobiaceae          | Prosthecochloris   | aestuarii         | [78]      |
| Proteobacteria | $\alpha$ -Proteobacteria | Hyphomicrobiales | Blastochloridaceae     | Blastochloris      | viridis           | [75]      |
| Proteobacteria | $\alpha$ -Proteobacteria | Hyphomicrobiales | Hyphomicrobiaceae      | Rhodomicrobium     | vannielii         | [75]      |
| Proteobacteria | $\alpha$ -Proteobacteria | Hyphomicrobiales | Nitrobacteraceae       | Rhodoplanes        | roseus            | [75]      |
| Proteobacteria | Alphaproteobacteria      | Hyphomicrobiales | Nitrobacteraceae       | Rhodospseudomonas  | palustris         | [92]      |
| Proteobacteria | $\alpha$ -Proteobacteria | Rhodospirillales | Rhodospirillaceae      | Phaeospirillum     | fulvum            | [75]      |
| Proteobacteria | $\alpha$ -Proteobacteria | Rhodospirillales | Rhodospirillaceae      | Pararhodospirillum | photometricum     | [75]      |
| Proteobacteria | $\alpha$ -Proteobacteria | Rhodospirillales | Rhodospirillaceae      | Rhodospirillum     | rubrum            | [75]      |
| Proteobacteria | $\alpha$ -Proteobacteria | Rhodospirillales | Rhodospirillaceae      | Roseospora         | mediosalina       | [75]      |
| Proteobacteria | $\alpha$ -Proteobacteria | Rhodobacterales  | Rhodobacteraceae       | Planktomarina      | temperata         | [75]      |
| Proteobacteria | $\alpha$ -Proteobacteria | Rhodobacterales  | Rhodobacteraceae       | Rhodobacter        | capsulatus        | [75]      |
| Proteobacteria | $\alpha$ -Proteobacteria | Rhodobacterales  | Rhodobacteraceae       | Halovulum          | dunhuangense      | [75]      |
| Proteobacteria | $\alpha$ -Proteobacteria | Rhodobacterales  | Rhodobacteraceae       | Cereibacter        | changelensis      | [75]      |
| Proteobacteria | $\beta$ -Proteobacteria  | Rhodocyclales    | Rhodocyclaceae         | Rhodocyclus        | purpureus         | [75]      |
| Proteobacteria | $\beta$ -Proteobacteria  | Burkholderiales  | Comamonadaceae         | Rubrivivax         | gelatinosus       | [75]      |
| Proteobacteria | $\beta$ -Proteobacteria  | Burkholderiales  | Comamonadaceae         | Hydrogenophaga     | flava             | [75]      |
| Proteobacteria | $\beta$ -Proteobacteria  | Burkholderiales  | Comamonadaceae         | Rhodoferax         | fermentans        | [75]      |
| Proteobacteria | $\gamma$ -Proteobacteria | Chromatiales     | Ectothiorhodospiraceae | Ectothiorhodosinus | mongolicus        | [76]      |
| Proteobacteria | $\gamma$ -Proteobacteria | Chromatiales     | Ectothiorhodospiraceae | Ectothiorhodospira | mobilis           | [76]      |
| Proteobacteria | $\gamma$ -Proteobacteria | Chromatiales     | Chromatiaceae          | Allochrochromatium | vinosum           | [76]      |
| Proteobacteria | $\gamma$ -Proteobacteria | Chromatiales     | Chromatiaceae          | Caldichromatium    | japonicum         | [79]      |
| Proteobacteria | $\gamma$ -Proteobacteria | Chromatiales     | Chromatiaceae          | Chromatium         | okenii            | [76]      |
| Proteobacteria | $\gamma$ -Proteobacteria | Chromatiales     | Chromatiaceae          | Halochromatium     | salexigenens      | [76]      |
| Proteobacteria | $\gamma$ -Proteobacteria | Chromatiales     | Chromatiaceae          | Imhoffiella        | purpurea          | [80]      |
| Proteobacteria | $\gamma$ -Proteobacteria | Chromatiales     | Chromatiaceae          | Isochromatium      | buderi            | [81]      |
| Proteobacteria | $\gamma$ -Proteobacteria | Chromatiales     | Chromatiaceae          | Lamprobacter       | modestohalophilus | [82]      |
| Proteobacteria | $\gamma$ -Proteobacteria | Chromatiales     | Chromatiaceae          | Lamprocystis       | roseopersicina    | [75]      |
| Proteobacteria | $\gamma$ -Proteobacteria | Chromatiales     | Chromatiaceae          | Marichromatium     | gracile           | [76]      |
| Proteobacteria | $\gamma$ -Proteobacteria | Chromatiales     | Chromatiaceae          | Nitrosococcus      | nitrosus          | [83]      |
| Proteobacteria | $\gamma$ -Proteobacteria | Chromatiales     | Chromatiaceae          | Phaeobacterium     | nitratireducens   | [84]      |
| Proteobacteria | $\gamma$ -Proteobacteria | Chromatiales     | Chromatiaceae          | Phaeochromatium    | fluminis          | [85]      |
| Proteobacteria | $\gamma$ -Proteobacteria | Chromatiales     | Chromatiaceae          | Rhabdochromatium   | marinum           | [86]      |
| Proteobacteria | $\gamma$ -Proteobacteria | Chromatiales     | Chromatiaceae          | Thermochromatium   | tepidum           | [75]      |
| Proteobacteria | $\gamma$ -Proteobacteria | Chromatiales     | Chromatiaceae          | Thioalkalicoccus   | limnaeus          | [87]      |
| Proteobacteria | $\gamma$ -Proteobacteria | Chromatiales     | Chromatiaceae          | Thiobaca           | trueperi          | [88]      |
| Proteobacteria | $\gamma$ -Proteobacteria | Chromatiales     | Chromatiaceae          | Thiocapsa          | roseopersicina    | [75]      |
| Proteobacteria | $\gamma$ -Proteobacteria | Chromatiales     | Chromatiaceae          | Thiococcus         | pfennigii         | [75]      |
| Proteobacteria | $\gamma$ -Proteobacteria | Chromatiales     | Chromatiaceae          | Thiocystis         | violacea          | [75]      |
| Proteobacteria | $\gamma$ -Proteobacteria | Chromatiales     | Chromatiaceae          | Thiodictyon        | elegans           | [89]      |
| Proteobacteria | $\gamma$ -Proteobacteria | Chromatiales     | Chromatiaceae          | Thiohalocapsa      | halophila         | [75]      |
| Proteobacteria | $\gamma$ -Proteobacteria | Chromatiales     | Chromatiaceae          | Thiolamprovum      | pedioforme        | [75]      |
| Proteobacteria | $\gamma$ -Proteobacteria | Chromatiales     | Chromatiaceae          | Thiopedia          | rosea             | [90]      |
| Proteobacteria | $\gamma$ -Proteobacteria | Chromatiales     | Chromatiaceae          | Thiophaeococcus    | mangrovi          | [75]      |
| Proteobacteria | $\gamma$ -Proteobacteria | Chromatiales     | Chromatiaceae          | Thiorhodococcus    | minor             | [75]      |
| Proteobacteria | $\gamma$ -Proteobacteria | Chromatiales     | Chromatiaceae          | Thiorhodovibrio    | winogradskyi      | [75]      |
| Proteobacteria | $\gamma$ -Proteobacteria | Chromatiales     | Chromatiaceae          | Thiospirillum      | jenense           | [91]      |
| Proteobacteria | $\gamma$ -Proteobacteria | Chromatiales     | Halorhodospiraceae     | Halochlorospira    | halochloris       | [76]      |
| Proteobacteria | $\gamma$ -Proteobacteria | Chromatiales     | Halorhodospiraceae     | Halorhodospira     | halophila         | [76]      |
